# Supplementary material for: Pathways to sustaining tuna-dependent Pacific Island economies during climate change
Source: Springer Nature journal article supplement (doi:10.1038/s41893-021-00745-z), 2021-07-29
Supplement: 41893_2021_745_MOESM1_ESM.pdf [file 41893_2021_745_MOESM1_ESM.pdf]

---

**Supplementary information**

---

**Pathways to sustaining tuna-dependent  
Pacific Island economies during climate  
change**

---

In the format provided by the  
authors and unedited

## Supplementary information

### Pathways to sustaining tuna-dependent Pacific Island economies during climate change

Johann D. Bell, Inna Senina, Timothy Adams, Olivier Aumont, Beatriz Calmettes, Sangaalofa Clark, Morgane Dessert, Marion Gehlen, Thomas Gorgues, John Hampton, Quentin Hanich, Harriet Harden-Davies, Steven R. Hare, Glen Holmes, Patrick Lehodey, Matthieu Lengaigne, William Mansfield, Christophe Menkes, Simon Nicol, Coral Pasisi, Graham Pilling, Yoshitaka Ota, Chis Reid, Espen Ronneberg, Alex Sen Gupta, Katherine L. Seto, Neville Smith, Sue Taei, Martin Tsamenyi, Peter Williams

Correspondence to: [jbelle@conservation.org](mailto:jbelle@conservation.org)

| Contents                                                                                          | Page      |
|---------------------------------------------------------------------------------------------------|-----------|
| <b>Supplementary Notes</b> .....                                                                  | <b>2</b>  |
| Supplementary Note 1: Economic dependence of Pacific Small Island Developing States on tuna ..... | 2         |
| Supplementary Note 2: Status of tuna stocks in the Western and Central Pacific Ocean .....        | 2         |
| Supplementary Note 3: Co-operative management of tuna by the Parties to the Nauru Agreement.....  | 3         |
| Supplementary Note 4: ‘Vessel Day Scheme’ provisions for adaptation to climate .....              | 4         |
| Supplementary Note 5: Influence of climate change on the Western Pacific Warm Pool .....          | 5         |
| Supplementary Note 6: Climate change concerns by Pacific SIDS and initiatives within WCPFC .....  | 6         |
| Supplementary Note 7: Introduction to SEAPODYM.....                                               | 7         |
| Supplementary Note 8: Interactions with the BBNJ Agreement .....                                  | 8         |
| Supplementary Note 9: Climate justice considerations for tuna-dependent Pacific SIDS .....        | 9         |
| Supplementary Note 10: Provisions for sustaining tuna-dependent economies .....                   | 9         |
| 10.1 <i>The international legal framework</i> .....                                               | 9         |
| 10.2 <i>Possible legal pathways for achieving sustained economies and climate justice</i> .....   | 12        |
| Supplementary Note 11: Allocation of high-seas fishing rights .....                               | 15        |
| Supplementary Note 12: Loss and damage provisions .....                                           | 15        |
| Supplementary Note 13: United Nations Climate Security Mechanism.....                             | 16        |
| <b>Supplementary Methods</b> .....                                                                | <b>17</b> |
| Summary of projected climates from NEMO-PISCES outputs .....                                      | 17        |
| Sensitivity analyses .....                                                                        | 17        |
| Limitations of RCP2.6 modelling .....                                                             | 19        |
| <b>Supplementary References</b> .....                                                             | <b>20</b> |
| <b>Supplementary Figures 1–17</b> .....                                                           | <b>26</b> |
| <b>Supplementary Tables 1–21</b> .....                                                            | <b>43</b> |

## Supplementary Notes

### Supplementary Note 1: Economic dependence of Pacific Small Island Developing States on tuna

On average, only 2% of the combined jurisdictions of all Pacific Small Island Developing States (SIDS) is comprised of land, with the remaining 98% consisting of the combined area of their territorial waters (and in some cases archipelagic waters) and exclusive economic zones (EEZs)<sup>9</sup>. For this reason, Pacific SIDS are often referred to as ‘large ocean developing states’ (PIFS 2002)<sup>72</sup>. Furthermore, the EEZs of the 10 tuna-dependent Pacific SIDS are the prime purse-seine fishing grounds in the Western and Central Pacific Ocean (WCPO). Within the Pacific Island region of the WCPO (130°E–120°W and 20°S–20°N), ~90% of the average purse-seine catch for the 10-year period 2009–2018 came from the combined EEZs of these 10 Pacific SIDS (see Supplementary Table 3 for details), with most of the remaining catch from this area coming from the high-seas areas in the WCPO between 20°S and 20°N (see areas I1, I2, I3, I4, I5, I8, I9, H4, H5 in Supplementary Figure 1, and Supplementary Table 4 for catch details). A negligible proportion of the average annual purse-seine catch from the region (~2,000 tonnes) comes from the combined EEZs of the other 12 Pacific SIDS.

As the information in Supplementary Table 2 illustrates, access fees earned from purse-seine fishing operations catching tuna within their EEZs enables nine Pacific SIDS (Cook Islands, Federated States of Micronesia, Kiribati, Marshall Islands, Nauru, Palau, Solomon Islands, Tokelau, and Tuvalu) to derive an average of 9–84% of their government revenue (excluding grants) from tuna. Papua New Guinea (PNG) can also be considered to have a tuna-dependent economy, despite the fact that average annual fishing access fees (\$134 million) contribute only 4% of government revenue due to the much larger size of its economy compared to those of other Pacific SIDS (Supplementary Table 2). The dependence of PNG’s economy on tuna also stems from the employment opportunities associated with the numerous national canneries processing tuna caught by purse-seine fishing and the extent of industrial tuna fishing that occurs in PNG’s waters, which have collectively created 12,000 jobs<sup>1</sup>.

Tuna are also caught by longline fleets in the EEZs of the 10 Pacific SIDS, and by pole-and-line fishing in Federated States of Micronesia, Papua New Guinea and Solomon Islands. However, the quantities of fish caught using these methods, and their contributions to national economies, are much lower than for the purse-seine fishery. Information on the respective contribution of purse-seine, longline and pole-and line fishing to license and access fee revenue and GDP of Pacific SIDS can be found in the annual Tuna Fishery Report Card for the Regional Roadmap for Sustainable Pacific Fisheries produced by the Pacific Islands Forum Fisheries Agency (FFA) and the Pacific Community (SPC) (<https://fame1.spc.int/en/publications/roadmap-a-report-cards>).

### Supplementary Note 2: Status of tuna stocks in the Western and Central Pacific Ocean

Regional assessments of tropical tuna stocks within the WCPO are performed under the auspices of the Western and Central Pacific Fisheries Commission (WCPFC) ([www.wcpfc.int/about-wcpfc](http://www.wcpfc.int/about-wcpfc)) by the scientific services provider, the Oceanic Fisheries Programme at SPC. For each species of tuna, a stock assessment is generally performed every three years. Assessments are reviewed by the WCPFC’s Scientific Committee to provide the best scientific information available.

WCPFC adopted a limit reference point for the key tuna stocks of 20% of the potential spawning (adult) population estimated in the absence of fishing. The Scientific Committee considers that populations below this level pose a risk to stock sustainability. For fishing mortality, the default limit is the level associated with achieving Maximum Sustainable Yield (FMSY). WCPFC had also adopted an interim biomass target reference point for skipjack tuna in 2016, at 50% of the spawning biomass estimated in the absence of fishing. This is currently under review by WCPFC.

The most recent assessments of bigeye tuna<sup>73</sup>, skipjack tuna<sup>74</sup> and yellowfin tuna<sup>75</sup> in the WCPO were conducted in 2020, 2019 and 2020, respectively. All assessments include an evaluation of uncertainties in stock dynamics (creating the ‘structural uncertainty grid’). The estimated probability that current fishing mortalities exceeded FMSY was low (i.e., no stocks were considered likely to be subject to overfishing). Similarly, the estimated probability that the current spawning biomass of any tuna species is below the level that would cause concern for sustainability is low (i.e., no stocks were considered likely to be in an overfished state). These findings are summarised in the ‘Majuro plot’ shown in Supplementary Figure 16. In short, good management of purse-seine fishing by the Parties to the Nauru Agreement (PNA), supported by WCPFC’s complementary conservation and management measures, has resulted in none of the three tuna species in the WCPO being overfished, and agreement that overfishing is not occurring. This is not the case for stocks of these species in other oceans under the oversight of other regional fisheries management organisations (Supplementary Figure 17).

Given the regular analysis of stock status for the key tuna species, fisheries management agencies in the WCPO are well placed to identify and react to the impacts of climate change. The present strategy of these agencies is to buffer the impacts of climate change on the status of the key tuna stocks by ensuring that target population levels are sufficiently far away from the limit reference points used to maintain stocks at robust levels.

### **Supplementary Note 3: Co-operative management of tuna by the Parties to the Nauru Agreement**

Eight of the tuna-dependent Pacific SIDS<sup>a</sup> co-operate as the Parties to the Nauru Agreement<sup>b</sup> in the management of the tuna within their EEZs to maximize the sustainable benefits derived from these valuable resources. The average total purse-seine catch of tuna from PNA waters, i.e., 1.4 million tonnes of skipjack, yellowfin and bigeye tuna combined per year (Supplementary Table 3), provides ~30% of the global tuna catch<sup>76,77</sup>.

The PNA Vessel Day Scheme (VDS)<sup>c</sup> is a zone-based management tool – in legal terms a scheme under the Palau Arrangement – that limits purse-seine fishing effort in the EEZs of Parties in terms of fishing days to an annual Total Allowable Effort (TAE). The TAE is established in accordance with an effort limit for purse-seine fishing in PNA EEZs agreed within a set of broader measures for the conservation and management of tropical tunas (skipjack, yellowfin, and bigeye) by WCPFC. These measures are agreed on a three- or four-year cycle, taking into account advice from the WCPFC

---

<sup>a</sup> Federated States of Micronesia, Kiribati, Marshall Islands, Nauru, Palau, Papua New Guinea, Solomon Islands, Tuvalu.

<sup>b</sup> Nauru Agreement Concerning Cooperation in the Management of Fisheries of Common Interest, <https://www.pnatuna.com/content/nauru-agreement>.

<sup>c</sup> Purse Seine Vessel Day Scheme, <https://www.pnatuna.com/content/purse-seine-vds>.

Scientific Committee on the management of the major tropical tuna stocks taken in the purse seine-fishery<sup>70</sup>.

The TAE is allocated among the eight Parties as a set of Party Allowable Effort limits (PAEs) that constitute national, zone-based, transferable, effort limits for use in each Party's EEZ. Parties have substantial freedom in how they use their PAEs, but are required by the VDS to take all necessary measures to ensure that their PAE is not exceeded.

Tokelau participates in the VDS under a Memorandum of Understanding agreed with PNA. Tokelau brings its own TAE/PAE and is not included in the allocation process, but its days are adjusted in relation to changes to the PNA TAE and are transferable to other Parties under the VDS. For the purpose of this Analysis, reference to PNA includes participation by Tokelau.

Decisions on the VDS are recommended by PNA officials, meeting at least annually, and ratified by annual meetings of PNA Ministers. High-level oversight of the VDS is exercised by PNA Leaders, meeting in occasional summits.

#### **Supplementary Note 4: 'Vessel Day Scheme' provisions for adaptation to climate**

The main objective of the VDS is to enable PNA members to maximize their net economic returns from the sustainable use of tuna resources within their EEZs. The design of the VDS to achieve this objective takes into account climate variability in the form of variations in the distribution and abundance of tuna across the equatorial Pacific Ocean associated with El Niño Southern Oscillation (ENSO) events. Its structural elements and provisions are designed to minimise the effects of climatic variability on equitable distribution of access revenue earned from the purse-seine fishery among PNA members<sup>70,71</sup>, but they can also assist PNA members to adapt to the effects of climate change. The relevant provisions of the VDS include 'transferability', 'pooling', 'roaming' and the way in which 'Party Allowable Effort' is adjusted<sup>70</sup>.

Transferability allows PNA members to trade PAE VDS days among themselves and, consequently, among EEZs, but not among vessel operators. It allows Parties to respond to the effects of ENSO or climate change, on the location of the prime tuna fishing grounds. During La Niña events, the fleets fish in the west of the region, whereas the converse occurs during El Niño episodes. As skipjack and yellowfin tuna are progressively redistributed eastwards (Figure 2), transferability will allow Parties in the west to cushion the impact of climate change by selling days to those in the east.

Pooling involves more than one Party putting their fishing days together into a pool of days that can be used in any of those Parties' EEZs. This not only increases the value of the days because it allows fleets more flexibility to 'follow the fish', it also provides more scope for effort to be adjusted in response to redistribution of tuna due to climate change.

Roaming enables national vessels to fish in other Parties' EEZs beyond their Home Party's EEZ, using fishing days provided from the PAE of their Home Party, outside the provisions of the VDS related to transferability and pooling. Designed primarily to provide support for development of domestic fishing

fleets, this arrangement allows for greater flexibility in adjusting effort to short-, medium- and long-term changes in distribution of tuna resources targeted by purse-seine fishing.

PAEs are generally adjusted annually with substantial weighting given to historical (previous 8–10 years) fishing effort within Parties' EEZs (EEZ area is a fixed factor that may also be taken into account). Under this arrangement, the PAE allocations reflect the patterns of fishing effort driven by the influence of ENSO and climate change on the distribution of tuna, and are enabled by the transferability, pooling, and roaming provisions of the VDS. As tuna are redistributed due to climate change (Figure 2), PNA members in the east are expected to accrue a greater number of vessel days, whereas those in the west are expected to lose days. The agreed provisions of the VDS enable the reallocation of fishing effort among the Parties in a non-confrontational way.

#### **Supplementary Note 5: Influence of climate change on the Western Pacific Warm Pool**

Several previous studies have used climate models to forecast how the tropical Pacific Ocean is likely to change in the future as a result of increased greenhouse gas (GHG) emissions<sup>10,78-80</sup>. All models used in the Coupled Model Intercomparison Project versions 3 and 5 (CMIP3 & CMIP5) show continued warming of the tropical Pacific Ocean with slightly enhanced warming along the equatorial Pacific, possibly associated with a projected slowdown in the equatorial trade winds. Warming anomalies extend to a depth of many hundreds of metres in the water column. This results in a large eastward shift in the location of the edge of the Western Pacific Warm Pool (hereafter 'warm pool') (as defined by a fixed isotherm, e.g., 28.5 or 29 °C) and an associated deepening of the thermocline<sup>78</sup>. Based on CMIP3 models, the historical area contained within the 29 °C isotherm: 9 Mkm<sup>2</sup> (averaged over 1980–2000) expands to 29–33 Mkm<sup>2</sup> (model ensemble 90% confidence interval) by 2050 (ref 10). Despite the dramatic increase in the extent of the warm pool, there is no corresponding shift in the dynamical edge of this important feature of the tropical Pacific Ocean defined by the maximum salinity gradient<sup>80</sup>.

Climate models also project consistent changes in circulation for the tropical Pacific Ocean, with implications for the transport of nutrients and distribution of pelagic species. In the western basin, the New Guinea Coastal Undercurrent – the main Southern Hemisphere, lower-latitude, western boundary current and a major source of dissolved iron for the equatorial Pacific – is projected to increase. In contrast, the Mindanao Current which feeds both the equatorial circulation and the Indonesian Throughflow is projected to decrease<sup>81-83</sup>. Although model agreement is less consistent, the Equatorial Undercurrent that transports large volumes of water and nutrients along the equator from the western Pacific to the eastern Pacific upwelling zone is projected to intensify in the western basin while decreasing slightly in the east.

Projections of subsurface dissolved oxygen (O<sub>2</sub>) concentration in the tropical Pacific Ocean are mixed across the models<sup>84,85</sup>. This is a consequence of competing effects of decreased solubility associated with warmer water, changes in circulation, and modified rates of biological remineralisation<sup>85</sup>.

## **Supplementary Note 6: Climate change concerns by Pacific SIDS and initiatives within WCPFC**

The Presidents and Prime Ministers of Pacific Islands Forum (PIF) member governments meet every year to discuss their most significant shared problems and priorities. In 2019, in ranking different threats to the security of the PIF region, Pacific Island Leaders “reaffirmed climate change as the single greatest threat to the livelihoods, security and well-being of the peoples of the Pacific”<sup>86</sup>.

FFA member governments took this concern to WCPFC in December 2019, pointing out that “climate change places a great risk on the benefits to Small Island Developing States in the Pacific from our region’s tuna fisheries. For many of our countries, tuna fisheries are a critical, if not the most critical, renewable resource providing essential social, cultural and economic benefits”. They also drew attention to the strong support that Pacific Island Fisheries Ministers had given to assisting fisheries to respond to climate change, including: “work on adaptive management regimes; the securing of baselines and associated maritime boundaries in the face of sea-level rise; and the importance of ensuring tuna stocks are managed at levels that continue to contribute to the food security of Pacific Island communities given the predicted declines in coastal fisheries resources”<sup>87</sup>.

FFA members proposed action by WCPFC on several fronts, including “increased focus and attention by the Scientific Committee’s Ecosystem and Bycatch Working Group on the implications of climate change for the region’s tuna stocks”, and “active consideration by the Commission of how, through agreement of appropriate Conservation and Management Measures, it can mitigate the impacts of climate change on Pacific Island countries arising from the influence of climate change on regional tuna stocks”<sup>87</sup>.

Following this proposal, WCPFC adopted Resolution 2019-01 on Climate Change<sup>88</sup> (see below). WCPFC Resolutions are non-binding, but set the stage to work on the development of a binding Measure. Some FFA members are considering proposing, for example, a requirement for ecosystem and climate indicators to be taken formally into account in WCPFC fishery conservation, management and allocation measures, based on exploratory work led SPC<sup>89</sup>.

Under the Resolution 2019-01 on Climate Change, WCPFC resolved to:

- 1) Consider the potential impacts of climate change on highly-migratory fish stocks in the Convention Area and any related impacts on the economies of Commission Country Members (CCMs) and food security and livelihoods of their people, in particular Small Island Developing States and Participating Territories.
- 2) Support further development of science on the relationship between climate change and target stocks, non-target species, and species belonging to the same ecosystem or dependent on or associated with the target stocks, as well as interrelationships with other factors that affect these stocks and species and estimates of the associated uncertainties.
- 3) Take into account in its deliberations, including in the development of conservation and management measures, scientific information available from the Scientific Committee on the potential impacts of climate change on target stocks, non-target species, and species belonging to the same ecosystem or dependent on or associated with the target stocks.

- 4) Consider how climate change and fishing activities may be related and address any potential impacts in a manner consistent with the Convention.
- 5) Consider options to reduce the environmental impacts of the Commission related to headquarters operation and meetings of the Commission and its subsidiary bodies.

### **Supplementary Note 7: Introduction to SEAPODYM**

SEAPODYM (Spatial Ecosystem And POPulation DYnamics Model; [www.seapodym.eu](http://www.seapodym.eu)) is a numerical model developed for investigating physical-biological interactions between fish populations and the ocean pelagic ecosystem<sup>15,17,65,90-92</sup>. SEAPODYM simulates the change in abundance of a target fish species over time, using their age dimensions in a simplified 3D space (three pelagic layers of the oceanic environment). The model also considers the life-history stages of fish species, from the larval stage to the mature adult stage, and includes a representation of the prey density fields of the modelled species, simulated as functional groups of zooplankton and micronekton<sup>16,62,91,93</sup>. SEAPODYM uses a small number of parameters linking rates of reproduction, mortality, and movement with environmental variables to model the dynamics of target species. Quantitative methods, including global sensitivity analysis, a maximum likelihood estimation (MLE) approach, and statistical validation, have been developed to estimate these parameters<sup>17,64,65</sup>.

SEAPODYM has been used extensively to study the population dynamics of tropical tunas and the impact of fishing, environmental variability (including ENSO) and climate change on tuna stocks<sup>10,12,13,17,64-67,94,95</sup>.

The numerical modelling of fish population dynamics in SEAPODYM relies on underlying advection-diffusion-reaction equations, approximated by finite differences, and integrated on a latitude-longitude grid over the model domain at a selected temporal and spatial resolution. Fish movements are simulated based on relationships with environmental variables, with rules that change according to the life-history stage of the fish species. Thus, larvae and small juveniles drift passively with currents. At older life-history stages, fish movement has both passive and active components, the latter including directed and non-directional movements at rates dependent on fish size and habitat quality. The model accounts for both natural and fishing mortality.

SEAPODYM considers two habitat indices – spawning and feeding – to describe conditions for reproduction and survival, respectively. For tropical tuna species, the movement of the autonomous part of the population is assumed to be controlled by feeding habitat. Considering tropical tunas as opportunistic spawners, the spawning occurs in the areas where the highest spawning habitat index coincides with non-zero densities of mature tunas. Both habitat indices depend on environmental variables: temperature, O<sub>2</sub>, zooplankton (or primary production as a proxy) and the density of micronekton.

The quantitative MLE approach uses the massive number of observations available from the monitoring of industrial tuna catches, e.g., catch/effort and length-frequency records, available at the spatio-temporal resolutions of the model. In addition, recent integration of release-recapture tagging data into the likelihood function has allowed substantial improvements in the estimation of movement and habitat parameters<sup>65</sup>. Once the reference MLE model is achieved for a given species of tuna, and



validated with independent data, it provides a quantitative estimation of population dynamics and allows the effects of fishing and environmental variability to be investigated. Based on this robust modelling of tuna stocks and IPCC climate model forcing, it is also possible to project the future distribution and abundance of tropical tuna species.

### **Supplementary Note 8: Interactions with the BBNJ Agreement**

The international, legally-binding instrument for the conservation and sustainable use of marine biological diversity of areas beyond national jurisdiction under the United Nations Convention on the Law of the Sea (BBNJ Agreement)<sup>24</sup> addresses:

- marine genetic resources, including questions on the sharing of benefits;
- environmental impact assessments;
- area-based management tools, including marine protected areas; and
- capacity-building and the transfer of marine technology.

The ‘General Principles and Approaches’ of the latest draft of the BBNJ Agreement (UNGA, 2019)<sup>96</sup> include building ecosystem resilience to the adverse effects of climate change, see Draft Article 5(h).

The BBNJ Agreement also includes recognition of the special requirements of developing States, including SIDS (Draft Articles 11, 42, 43, 51). In particular, there are two requirements potentially related to sustainability and climate justice in the context of tuna-dependent Pacific SIDS.

- 1) Advance and share scientific knowledge relating to climate change impacts on the ocean, in the following ways:
  - strengthen cooperation in marine scientific research to identify, predict and monitor ocean ecosystems, enable access to genetic tools and technologies; and promote the generation of knowledge and technological innovations (including as an element of benefit-sharing from marine genetic resources);
  - build capacity and technology transfer, for example, information dissemination and awareness-raising, including effects of climate change and ocean acidification [Draft Annex II (b)(iv)]; and development and strengthening of institutional capacity, including at a subregional or regional level [Draft Annex II (d) (ii)]; and
  - institutional mechanisms to evaluate and disseminate scientific knowledge relevant to the impacts of climate change on high-seas biodiversity (Scientific and Technical Body; Clearinghouse mechanism); and provide international fora for cooperation, information exchange and coordination between global, regional, and sectoral organisations on climate change impacts on the high seas and the special requirements of SIDS.
- 2) Address climate change impacts and alleviate the burden by:
  - providing a mechanism to address cumulative impacts on marine biodiversity in areas beyond national jurisdiction, which may include climate change (warming, deoxygenation, acidification) (Draft Article 25); and
  - establishing area-based management tools, including marine protected areas, to provide climate refugia<sup>97</sup> and boost ecosystem resilience, see Draft Article 14(e).

## **Supplementary Note 9: Climate justice considerations for tuna-dependent Pacific SIDS**

The basis for raising awareness of climate-driven redistribution of tuna as a climate justice issue is that 10 Pacific SIDS have a deep economic dependence on tuna fishing (Supplementary Table 2) but make trivial contributions to GHG emissions. In contrast, the distant-water fishing nations that are responsible for 60% of historical GHG emissions (see below) are likely to benefit from climate change by taking a greater proportion of their tuna catches from high-seas areas, where access fees do not apply.

Based on the ‘PRIMAP-hist’ national historical emissions time series<sup>98</sup>, global emissions were 47 gigatons of CO<sub>2</sub> equivalent in 2016 (this includes Kyoto greenhouse gases, but does not include emissions from land use, land-use change, and forestry). Of these total emissions, 26 gigatons or 55% were from the developed countries that are the ‘distant-water fishing nations’ (DWFNs) operating in the tropical Pacific Ocean (USA, China, EU, Japan, South Korea, and Taiwan). When the historical emissions from 1850 to 2016 are considered, these DWFNs have accounted for 60% of the total.

Pacific SIDS contribute trivial amounts of GHG due to their small population size and low per capita emissions. For example, Kiribati is the second lowest emitter in the world. According to Kiribati’s 2<sup>nd</sup> National Communication to the United Nations Framework Convention on Climate Change (UNFCCC), Kiribati’s emissions in per capita terms are 7% of the global average and 2% of the USA average.

## **Supplementary Note 10: Provisions for sustaining tuna-dependent economies**

### *10.1 The international legal framework*

Several international legal instruments govern the conservation, management and utilisation of tuna resources that occur within the maritime jurisdiction of Pacific SIDS and the adjacent high seas. The climate change impacts on these tuna resources need to be considered within these existing global and regional legal frameworks. The relevant international instruments include:

- The United Nations Convention on the Law of the Sea 1982 (The Law of the Sea Convention);
- The Agreement for the Implementation of the Provisions of the United Nations Convention on the Law of the Sea of 10 December 1982 Relating to the Conservation and Management of Straddling Fish Stocks and Highly Migratory Fish stocks (UN Fish Stocks Agreement); and
- The Convention for the Conservation and Management of Highly Migratory Fish Stocks in the Western and Central Pacific Ocean (WCPF Convention).

Climate change and its likely impacts on fisheries were not considered during the negotiation of the above international legal instruments. Accordingly, there are no provisions in these instruments that specifically address the migration of tunas from the EEZs of Pacific SIDS to the high seas as a result of climate change. However, these international legal instruments, especially the Law of the Sea Convention and the UN Fish Stocks Agreement, enshrined a number of principles that may be drawn upon in addressing the impacts of climate change on the distribution of migratory fish stocks and the economies that depend on these resources. The relevant principles include international cooperation, equity, and long-term conservation and sustainable use of fish stocks.

Below, we summarise how the application of these principles will ensure continued involvement of Pacific SIDS in the conservation and long-term sustainable management of tuna resources in their region. We also show how these principles may minimise impacts on the revenue Pacific SIDS derive from exercising their sovereign rights to the existing resources in their EEZs, as those resources move progressively to the high seas as a result of climate change.

#### 10.1.1 The Law of the Sea Convention

The Law of the Sea Convention is the principal international legal instrument governing marine fisheries conservation and utilisation. The Law of the Sea Convention was negotiated during the Third United Nations Conference on the Law of the Sea from 1973–1982.

For the regulation of maritime activities, the Law of the Sea Convention adopts a zonal approach which divides the sea into various maritime zones of jurisdiction, including internal waters, archipelagic waters, territorial seas, exclusive economic zones (EEZ) and the high seas. Fisheries located within the internal waters, archipelagic waters and territorial seas fall within the sovereignty of coastal States<sup>99</sup>. In respect of fisheries in the EEZ, coastal States have certain sovereign rights and duties as explained under ‘EEZ’ below.

#### EEZ

Part V of the Law of the Sea Convention established the concept of the EEZ, which is defined as an area beyond and adjacent to the territorial sea, extending not more than 200 nautical miles from the baseline from which the breadth of the territorial sea is measured (Law of the Sea Convention, Article 57). The EEZ regime was revolutionary in the sense that it brought under national jurisdiction large tracts of ocean that had previously belonged to the regime of the high seas. With respect to fisheries, the EEZ regime transferred property rights over the majority of the world’s then active fisheries from the international commons to the jurisdiction of coastal States.

Within the EEZ, the Law of the Sea Convention grants to each coastal State “sovereign rights for the purpose of exploring and exploiting, conserving and managing the natural resources, whether living or non-living of the waters superjacent to the sea-bed and of the sea-bed and its subsoil, and with regard to other activities for the economic exploitation and exploration of the zone...” [Law of the Sea Convention, Article 56(1)].

The sovereign rights of coastal States in their EEZs come with significant conservation obligations. Coastal States must take into account the best scientific evidence available to them to ensure through proper conservation and management measures that the living resources in the EEZ are not endangered by over-exploitation. To discharge their conservation obligations, coastal States are required, among other things, to:

- determine the allowable catch of the living resources in their EEZs;
- determine their capacity to harvest the allowable catch, and
- allocate the surplus of the allowable catch to the nationals of other States through access agreements, where coastal States do not have the capacity to harvest the allowable catch.

Conservation and management measures in the EEZ are to be designed “to maintain or restore populations of harvested species at levels which produce the maximum sustainable yield as qualified by relevant environmental and economic factors, including the economic needs of coastal fishing communities and the special requirements of developing States, and fishing patterns”.

It is important to observe that the EEZ is a hybrid zone within which other states continue to enjoy specified established freedoms of the high seas – navigation and overflight, the laying of pipelines and other associated uses.

Under the EEZ regime, the Law of the Sea Convention has specific provisions, relating respectively to straddling fish stocks and highly migratory species, that apply to tunas. These provisions oblige coastal States and States whose nationals fish on the high seas for these species to cooperate through appropriate international organizations (establishing such organisations where necessary) with a view to ensuring conservation and promoting the objective of optimum utilization of such species within the region.

### The High Seas

Beyond the EEZ, the Law of the Sea Convention creates the high seas, defined as “all parts of the sea that are not included in the exclusive economic zone, in the territorial sea or in the internal waters or in the archipelagic waters of an archipelagic State” (Law of the Sea Convention, Article 86). On the high seas, the Law of the Sea Convention upholds the freedom of the high seas, which includes the freedom of fishing (Article 87, Law of the Sea Convention). However, the freedom of fishing on the high seas is subject to the treaty obligations of the fishing States and “the rights and duties as well as the interests of coastal States in the EEZ” (Article 116, Law of the Sea Convention).

Importantly, the Law of the Sea Convention imposes a duty on all States to cooperate through the establishment of subregional or regional fisheries organizations to ensure the conservation of the living resources on the high seas (Law of the Sea Convention, Articles 117 and 118). In discharging their conservation and management obligations on the high seas, States are required to determine the allowable catch and establish other conservation and management measures for the living resources. Conservation and management measures on the high seas are to be guided by: the best scientific evidence available; the need to restore populations of harvested species at levels which can produce the maximum sustainable yield as qualified by environmental and economic factors; the special requirements of developing States; fishing patterns; the interdependence of stocks; existing general recommended regional or subregional standards; and available catch and effort information and statistics [Law of the Sea Convention, Article 119(2)].

#### 10.1.2 The UN Fish Stocks Agreement

The provisions of the Law of the Sea Convention on straddling stocks and highly migratory fish stocks were fashioned on the premise that EEZ claimant States, and States fishing for such stocks in the adjacent high seas, would be diligent in their conservation of these stocks and in their obligation to cooperate. Within a decade of negotiating the Law of the Sea Convention, it became obvious to the international community that additional legal mechanisms were required to supplement and strengthen

the Convention with regard to the conservation and utilisation of straddling stocks and highly migratory species. The response by the international community was the development and ratification of the UN Fish Stocks Agreement.

Under this Agreement, States fishing for straddling stocks or highly migratory stocks are obliged to give effect to their duty to cooperate by joining the appropriate regional fisheries management organisation or by agreeing to apply its conservation and management measures. This obligation is supported by a rule that only those States that are members of the relevant regional fisheries management organisation (RFMO) or agree to apply its conservation and management measures can have access to the resources to which the measures apply [UN Fish Stocks Agreement Article 8(4)]. The Agreement also prescribes that conservation and management measures shall be compatible across the high seas and waters under national jurisdiction, without prejudice to the sovereign rights of coastal States (Article 7). The special requirements of developing States must also be considered, requiring, among other things, that conservation and management measures do not apply a disproportionate burden of conservation action onto developing States (Article 24). In this context, it is also important to note that the United Nations Sustainable Development Goal 14.7 aims to increase the economic benefits to SIDS and least developed countries from the sustainable use of marine resources, including through sustainable management of fisheries, aquaculture and tourism, by 2030 (UN 2015)<sup>100</sup>.

### 10.1.3 The WCPF Convention

Because international law classifies tunas as either straddling stocks or highly migratory species, it has become customary to establish RFMOs to manage them throughout their geographical range. Before the UN Fish Stocks Agreement in 1995, a number of such RFMOs were established in all oceans of the world except the Western and Central Pacific Ocean. Following the conclusion of the UN Fish Stocks Agreement, the imperative to establish an RFMO in the WCPO became paramount. This was achieved through the ‘Convention on the Conservation and Management of Highly Migratory Fish Stocks in the Western and Central Pacific Ocean (WCPF Convention) 2004’. The primary objective of the WCPF Convention is to ensure, through effective management, the long-term conservation and sustainable use of highly migratory fish stocks in the WCPO in accordance with the 1982 United Nations Convention on the Law of the Sea and the 1995 UN Fish Stocks Agreement. The WCPF Convention re-iterates the major principles under the UN Fish Stocks Agreement, including international cooperation and long-term sustainability.

### 10.2 *Possible legal pathways for achieving sustained economies and climate justice*

The potential impact of climate change on the continuation of the current sustainable management of tuna resources in the WCPF Convention area is a matter of international concern and requires international cooperation, consistent with the international legal framework. The RFMO for the WCPO, the Western and Central Pacific Fisheries Commission, has already begun to consider this issue and adopted a Resolution on Climate Change in 2019 (see Supplementary Note 6).

It is now apparent that climate-driven redistribution of tuna from EEZs to high-seas areas will have implications for the principle of ‘freedom of fishing’ on the high seas. At present, the right to fish is conditional and expressly subject to conditions concerning the conservation and management of the

living resources not only in the EEZ, but also on the high seas. Within the regulatory area of the WCPFC, the fundamental principles are the duty to cooperate, long-term conservation and sustainable use, compatibility across the range of the stocks, and consideration for the special requirements of developing States. There are obvious practical reasons why the duty to cooperate and the commitment to long-term conservation and sustainable use are fundamental applicable principles. It is in the nature of straddling or highly migratory stocks to move in response to changes in water temperature, food supply, shorter-term climate variability, longer-term climate change (including its effects on the ecosystems that support such stocks) or other factors – both known and unknown.

However, such stocks cannot be managed sustainably if, in the years in which they are concentrated in the high seas, they are overfished by distant water fleets and, in the years in which they are concentrated in EEZs, they are overfished by vessels authorised by the relevant coastal States. More generally, these stocks cannot be managed sustainably if the applicable conservation and management measures differ substantially between areas of high seas and areas under the jurisdiction of coastal States. They must be managed under a stable conservation and sustainable use regime that is not jeopardised in circumstances where a stock moves for a short or long period of time between the waters of coastal States and the high seas. The UN Fish Stocks Agreement and the WCPF Convention underscore this point by requiring compatibility of conservation and management measures between EEZs and the high seas.

In some respects, the overall situation has elements that are similar to a major hydrocarbon reserve that straddles the EEZs of two or more countries. Unilateral exploitation by one country could affect or even negate the rights of the other country or countries and lead to serious dispute. What is needed is a negotiated unitisation agreement. A major difference is that a hydrocarbon reserve is a finite resource, whereas a straddling or highly migratory fish stock is a potentially indefinitely renewable resource if managed sustainably. But this difference only strengthens the case for a negotiated outcome, preferably, the negotiation of a conservation and management measure by the WCPFC that takes account of all the interests involved. There may be many ways of achieving long-term equitable distribution of returns to both coastal States and DWFNs, possibly including some variation of the PNA Vessel Day Scheme (see Supplementary Note 4). Whatever system is developed must avoid any incentive for overfishing in either EEZs or the high seas.

Negotiation of such a conservation and management measure for tropical Pacific tuna will necessarily involve a number of coastal States, DWFNs and other entities with a complex set of interests. To be effective, these negotiations should result in the four outcomes described below.

- a) Total allowable levels of fishing effort/catches that are consistent with the objective of long-term conservation of Pacific tuna resources.
- b) Recognition of the special requirements of developing States, and the need to ensure conservation and management measures do not apply a disproportionate burden of conservation action onto developing States.
- c) Recognition of the respective dependence of coastal States and DWFNs on tuna resources.
- d) Procedures ensuring that short-term actions inconsistent with the long-term conservation objective are not incentivised, but actively discouraged.

With respect to points b) and c) above, it is important to note that these could be achieved through the mechanism for allocating rights to fish in the high seas that WCPFC has initiated (see Supplementary Note 11). To be a viable pathway to sustained economies and climate justice, the WCPFC allocation process will need to develop criteria that encompass the potential consequences of climate change on the reasonable expectations of all members.

The PNA member countries within FFA have a long and successful history of influencing WCPFC to protect and advance their interests and ensure that WCPFC's Conservation and Management Measures (CMMs) do not apply a disproportionate burden to Pacific SIDS. Examples of this successful advocacy can be seen in the 2008 decision to close two high-seas pockets to purse-seine fishing<sup>d</sup> and subsequent decisions to further expand restrictions on the use of drifting fish aggregating devices in high-seas areas<sup>e</sup>.

In addition to the point made in the main text about South Korea's acknowledgement of the dependence of Pacific SIDS on tuna and proposal to continue to pay access fees when fishing in high-seas areas, other distant-water fishing nations operating purse-seine vessels in the region have demonstrated that they are willing to consider new management arrangements for climate-driven changes to fish stocks occurring outside EEZs elsewhere. For example, USA, Japan, China, and the EU are all signatories to the International Agreement to Prevent Unregulated High Seas Fisheries in the Central Arctic Ocean: [www.dfo-mpo.gc.ca/international/agreement-accord-eng.htm](http://www.dfo-mpo.gc.ca/international/agreement-accord-eng.htm).

If negotiation within the WCPFC fails, a Conciliation Commission, utilising the dispute settlement mechanism under the WCPF Convention and international law, could greatly assist the process of devising a lasting solution that incorporates an appropriate level of flexibility and stability. The effectiveness of such a Conciliation Commission has been demonstrated by the Timor Sea Conciliation Commission involving Australia and Timor Leste (see Permanent Court of Arbitration, under the Timor Sea Treaty between Timor Leste and Australia, Case No. 2015-42).

Given that the threat to the continued effectiveness of the current regime stems from human-induced climate change attributable primarily to activities in States other than Pacific SIDS, it would also seem useful to consider in this context the principles developed by the International Law Commission on the allocation of loss in the case of transboundary harm arising out of hazardous activities, including Principle 7 on the development of specific regional arrangements concerning compensation and response measures (UNGA Resolution 61/36), in which the General Assembly of the United Nations took note of the principles and commended them to the attention of Governments.

---

<sup>d</sup> See WCPFC 2008 Annual Report

<sup>e</sup> See WCPFC Conservation and Management Measure 2018-01

## **Supplementary Note 11: Allocation of high-seas fishing rights**

The WCPF Convention explicitly identifies allocation as a function for WCPFC and provides a non-exclusive list of criteria to be considered (Article 10.3). Nevertheless, until relatively recently, WCPFC had not made progress on allocation due to disagreements between coastal States and DWFNs over the area of application, and whether any such allocation should include fisheries within EEZs<sup>101</sup>. In the absence of formal decisions on allocation, WCPFC adopted a series of CMMs that distributed fishing opportunities among members, while explicitly declaring that these did not confer any allocation of rights or prejudice future decisions<sup>f</sup>. Given the lack of a formalized allocation framework, these short-term decisions were primarily achieved through the adoption of flag-based limits founded on historical fishing with exemptions to developing States, for which historical fishing measures were not appropriate, to ensure they did not bear a disproportionate conservation burden.

However, in 2017, WCPFC reached consensus on a compromise for allocating long-term rights<sup>34</sup>. In particular, the Commission agreed to begin a process to establish hard limits first for high-seas purse-seine fisheries, then for longline fisheries, and a framework to allocate these limits for the high seas. A prime objective of these hard limits will be to achieve WCPFC's objectives for tuna stocks, for example, keeping the biomass for skipjack tuna around an adopted Target Reference Point. However, because the principles outlined by WCPFC for the guidance of this allocation framework (WCPF Convention Article 10.3) include environmental justice criteria, such as resource dependence and the special circumstances of developing States, this process has strong potential to enshrine values intrinsic to climate justice<sup>35</sup>. Addressing the disproportionate impacts of projected tuna migrations represents a merging of WCPFC's commitment to the allocation process with its commitment to consider the impacts of climate change and may present the most tractable approach to ensuring climate justice. The adoption and equitable allocation of high-seas limits to replace the current sets of limits based on historical fishing will also remove the need for exemptions for fleets from Pacific SIDS, thereby addressing the risks posed by unmanaged high-seas effort and ensuring the future sustainability and value of the fishery.

## **Supplementary Note 12: Loss and damage provisions**

The use of loss and damage mechanisms is gaining increased attention due to the severe impacts of climate change on developing countries. For example, in 2014, about 900 extreme weather events caused damage estimated at USD100 billion, with 60 per cent occurring in developing countries<sup>g</sup>. As a result, there is increasing, widespread international recognition that the current ambitions for adaptation and mitigation may not be effective for managing the consequences of global warming. The loss and damage debate has thus become an additional pillar of the international climate negotiations under UNFCCC. The topic has grown in importance since the Conference of the Parties in Warsaw (COP 19 in 2013) and the establishment of the Warsaw International Mechanism for Loss and Damage associated with climate change impacts (WIM). The Paris Agreement further underlined the

---

<sup>f</sup> See for example, paragraphs 8, 9, 28, and 42 of WCPFC (2018) CMM 2018-01 Conservation and Management Measure for Bigeye, Yellowfin and Skipjack Tuna in the Western and Central Pacific Ocean. Fifteenth Regular Session of the Western and Central Pacific Fisheries Commission. Honolulu, USA, 10-14 December 2018. WCPFC.

<sup>g</sup> [www.munichre.com/topics-online/en/climate-change-and-natural-disasters/natural-disasters/insurances-catch-breath-2014.html](http://www.munichre.com/topics-online/en/climate-change-and-natural-disasters/natural-disasters/insurances-catch-breath-2014.html)



importance of this issue, with a stand-alone provision on loss and damage (Article 8, Paragraphs 48–52 in the Decision Text). Accordingly, all Parties to UNFCCC are requested to develop and implement concrete and effective climate risk management (CRM) instruments and measures to avert, minimize, or – when the limits of adaptation are reached – effectively address residual loss and damage caused by climate-related extreme events and slow onset changes.

### **Supplementary Note 13: United Nations Climate Security Mechanism**

The Climate Security Mechanism of the United Nations was established to assist the UN and its membership to better understand the complex security implications of climate change, and effectively inform responses. The Climate Security Expert Network (CSEN),<sup>h</sup> which is comprised of experts from around the world, was established to support this mechanism and the Group of Friends on Climate and Security in the UN system by: synthesising scientific knowledge and expertise, advising on options for building resilience to climate-security risks, and helping to strengthen a shared understanding of the challenges and opportunities of addressing climate-related security risks across a range of stakeholders.

CSEN's members bring regional and thematic expertise from across the globe to develop important knowledge products and consultation processes supporting the climate security efforts of the UN and other stakeholders. Through support of the Climate Diplomacy effort – a partnership between Adelphi and the German Federal Foreign Office – the CSEN has recently developed a series of in-depth assessments of climate-fragility risks and factsheets, which are available from CSEN online.

The Climate Fragility Risk Brief and Fact Sheet on the Pacific Islands Region<sup>102</sup>, summarises the top five climate fragility challenges facing Pacific Island countries and advises on key entry points to address these challenges. The potential economic, employment and food security losses for Pacific SIDS associated with the projected changes in the distribution of tuna as a result of climate change are among the top challenges. The Climate Fragility Risk Brief for the region also highlights the modelling of climate-driven redistribution of tuna by SPC, Conservation International, and partners to inform the efforts of Pacific SIDS to build the necessary resilience and deal with the associated potential loss and damage. Specific recommendations include increased funding for improved modelling capacity and applied science, and exploring ways to retain the present-day benefits that Pacific SIDS receive from tuna fisheries regardless of climate-driven redistribution of stocks. The security risks posed to Pacific SIDS by climate-driven tuna redistribution was also highlighted in an open debate on climate change and security within the United Nations Security Council in July 2020, see presentation by Coral Pasisi at <http://webtv.un.org/watch/maintenance-of-international-peace-and-security-climate-and-securitysecurity-council-open-rtc/6174906506001>.

---

<sup>h</sup> <https://climate-security-expert-network.org/start>

## Supplementary Methods

### Summary of projected climates from NEMO-PISCES outputs

Outputs from the NEMO-PISCES framework<sup>i</sup> based on all Earth System Models (ESMs) (see Methods) except MPI showed an increase in epipelagic temperature in the WCPO and EPO, starting in the early 2030s (Supplementary Figure 3). There was, however, more variation among NEMO-PISCES outputs based on ESMs regarding projections for primary production. Although use of all ESMs predicted a slight and consistent decrease in primary production in the WCPO, there were notable differences for the EPO. PISCES-NEMO outputs based on MIROC and MPI produced a stable increase of primary production in the EPO until the late 2040s, whereas those based on GFDL and IPSL predicted a transition to lower primary production from the beginning of climate projections. In general, the decrease of primary producers in WCPO and EPO lead to a consistent thickening of the euphotic layers.

The effects of the RCP8.5 emissions scenario on SST and primary production (Supplementary Figure 3) were cascaded to the forage organisms and micronekton consumed by tuna. In general, there was a decline in biomass of forage and several functional groups of micronekton in the WCPO under all ESMs, whereas forage and all functional micronekton groups increased in the EPO until the late 2040s under two of the ESMs (MIROC and MPI) (Supplementary Figure 4).

### Sensitivity analyses

To account for uncertainty in decreased primary production associated with CMIP5 coupled ocean-biogeochemical models in SEAPODYM, we added one member to the simulation ensemble to include a gradual increase in primary production in warm tropical waters with SST >27°C, resulting in an increase of 10% relative to 2010 by the end of the century. We tested the sensitivity of our results for O<sub>2</sub> concentration by keeping the oxygen fields to their historical values. This enabled one more member of the simulation ensemble to use the climatological distribution of O<sub>2</sub> concentration instead of the model projections predicting a decrease of O<sub>2</sub> levels within tuna habitats.

We also investigated the effect of possible phenotypic plasticity within tuna populations as they respond to changing ocean temperatures. For that scenario, the estimated optimal spawning temperature increases linearly by 2°C at the end of the 21st Century, i.e., roughly following the temperature increase in the tropics under the RCP8.5 scenario.

For ocean acidification, we included the functional relationship based on the laboratory experiments with yellowfin tuna<sup>103</sup> to describe additional larval mortality due to decreasing pH. The uncertainty associated with laboratory experiments was integrated through three different parameterizations – low, medium, and high impact<sup>13</sup>.

---

<sup>i</sup> [www.nemo-ocean.eu](http://www.nemo-ocean.eu)

The rationale for performing additional sensitivity runs is explained below. The population dynamics of tropical tuna species are known to be highly sensitive to projected changes in primary production in the WCPO, and to the decline in O<sub>2</sub> concentration in the EPO<sup>12,67</sup>, however, long-term trends projected with coarse resolution coupled with physical-biogeochemical models show high uncertainty for these two variables. There are two apparent reasons for this. First, the CMIP5 coupled ocean-biogeochemical models projecting a decrease of primary production under RCP8.5 (ref 104) lack a number of processes that may change such projections, for example, mesoscale activity inducing stronger mixing<sup>105</sup> and a possible warming-induced increase in phytoplankton growth through intensification of the microbial loop<sup>106</sup>. Second, O<sub>2</sub> projections in the CMIP5 outputs are highly variable and uncertain<sup>107</sup>. Although decreasing trends in O<sub>2</sub> concentration have been detected from historical datasets<sup>108</sup>, their origin (in terms of possible observation errors, natural variability or climate change) is not yet clear. There is general agreement, however, that increasing the resolution of ESMs should provide a better representation of observed changes in O<sub>2</sub> (refs 109,110).

Supplementary Figure 11 shows average biomass for each tuna species in the WCPO and EPO for each sensitivity analysis scenario across four models. The thick grey line shows the multi-model mean biomass from the main projection simulation (REF). The SP scenario (10% increase of primary production in tropical region bounded by 27°C isotherm) confirms the high sensitivity of tropical tunas to primary production identified in previous studies<sup>12,62</sup>. An increase in primary production leads to larger stocks in the WCPO and EPO than those predicted by the reference forcing models. Except for skipjack tuna in the WCPO, the SP scenario results in increasing tuna stocks during the first half of the century even within the most pessimistic emission scenario.

The SO scenario, which assumes constant O<sub>2</sub> concentration at historical levels, highlights the critical role of oxygen in the EPO, and for tuna species accessing deeper pelagic layers, i.e., yellowfin and bigeye tuna. In the reference climate forcing, O<sub>2</sub> levels are decreasing in the epipelagic layer and increasing in both mesopelagic layers considered in SEAPODYM. Yellowfin tuna, which has a wider range of favourable habitat than skipjack tuna, both in horizontal and vertical dimensions, clearly benefits from the absence of trends in O<sub>2</sub> concentrations. However, in the EPO, the simulation for skipjack tuna, the species with the highest oxygen demands (preferred values  $\geq 3.8$ ml/l), shows no difference in biomass, or a slight and episodic reduction in biomass, under the SO scenario. In contrast, bigeye tuna which can tolerate oxygen levels as low as 0.5ml/l (ref 111) seems to be sensitive to this scenario and would have a lower biomass. These unlikely outcomes, however, might be an artefact of the simulation design for the sensitivity analysis, which uses monthly climatology of historical O<sub>2</sub> distributions, and should be interpreted with caution.

To examine the role that phenotypic plasticity within tuna populations may play on adaptation to changing ocean temperatures, we ran one additional scenario (ST) where preferred temperature for spawning increased by 1°C at mid-century. Adaptation to warmer temperatures in spawning grounds seems to be beneficial only to skipjack tuna in the WCPO. For skipjack tuna in the EPO, as well as for other tunas across the Pacific, the ST scenario leads to decreased tuna stock levels compared to simulations with reference forcing. This negative effect could be explained by two mechanisms. First, the constant rate of adaptation assumed through linear increase of preferred spawning temperature might not correspond to the rate of change of temperature in each climate model forcing. Second, the temperature increase in known spawning grounds of skipjack tuna is accompanied by decreasing ocean

productivity, effectively shrinking the areas suitable for larval survival in terms of food availability. Under such circumstances, adaptation to higher temperatures would drive skipjack tuna to spawn in less-productive zones, making this scenario less beneficial than in the absence of adaptation.

Finally, we tested the effect of interannual variability on the estimated relative change in tuna biomass under the simulated RCP4.5 scenario. To do this, we modified the method to simulate a synthetic RCP4.5 scenario over the time period 2011–2055 by reusing the RCP8.5 forcing. We generated another full time-series of environmental forcing, repeating the three 16-year cycles (2011–2026, 2019–2034 and 2030–2045) to ensure that CO<sub>2</sub> concentrations in the mid-century were similar to those in the RCP4.5 scenario. This sensitivity run was expected to result in a stronger impact on tuna biomass due to the use of forcing with a high rate of change in ocean conditions. However, it also enabled removal of the effect of interannual variability by comparing 2046–2055 to 2001–2010, the periods that have the same atmospheric variability in underlying ESM models. This method resulted in similar changes but with greater magnitude in the 10 Pacific SIDS, e.g., the average biomass of skipjack tuna in PNG and Solomon Islands is predicted to decrease by 25% and 16%, respectively, compared to the more moderate reductions by 19% and 10% in the reference simulation (Supplementary Table 7). The increase in average biomass in the EEZs of Pacific SIDS in the central Pacific Ocean, e.g., in Kiribati (Phoenix Islands) and Cook Islands, are computed as 16% and 13%, respectively, in these simulations compared to 8% and 9% as reported in Supplementary Table 7. Thus, the direct use of the forcing fields from the RCP8.5 scenario in this method gives more variable metrics, suggesting that the model projections are more sensitive to the method to generate a surrogate RCP4.5 forcing than to the effect of interannual variability.

### **Limitations of RCP2.6 modelling**

The simulations under the surrogate RCP2.6 forcing do not follow the expected pattern, i.e., there is a surprisingly large effect on tuna biomass, especially for skipjack tuna relative to RCP4.5 (Supplementary Figure 15). A possible explanation for the large shifts in tuna distribution projected by the surrogate RCP2.6 modelling is that the main assumption of independence in the rate of change for the ‘time-shift’ procedure is particularly fragile when the rates of change of forcing variables are significantly different between two simulations. This was the case for RCP2.6 and RCP8.5.

Another factor undermining the use of RCP8.5 forcing to imitate RCP2.6 is that the atmospheric variability in NEMO-PISCES forcings was repeated from the historical reanalysis during the projected time period. The time window from RCP8.5 simulations equivalent to RCP2.6 atmospheric CO<sub>2</sub> levels used to generate surrogate RCP2.6 forcings was 2011–2029 for the first four decades and 2021–2030 for the last decade (Supplementary Figure 14). As a result, the years of RCP8.5 simulation used to compute monthly climatological time series in RCP2.6 during the last decade, are characterised by the atmospheric variability between 1989 and 1998, a period known for a sequence of ENSO events, including the strongest El Niño on record in 1997–1998. As shown in Supplementary Figure 13, adult skipjack tuna responded by shifting eastward during this period. According to the classification of ENSO<sup>112</sup>, the resulting environmental conditions in the surrogate RCP2.6 forcing can be classified as a mixed-type El Niño. Therefore, such forcing fields represent an artificial thermal anomaly resulting in the greatest spatial shifts in tuna distributions and strong local impacts.

For the reasons outlined above, the uncertainty associated with using the time-shift method to estimate the effects of RCP2.6 is too high to have an acceptable level of confidence that it is a reasonable representation of the likely effects of this representative concentration pathway on the distribution of tropical Pacific tuna.

## Supplementary References

The section lists all references from the main text (1–71) (some of which are referred to in the supplementary information), followed by references cited only in the supplementary information (72–112).

1. FFA. *Economic and Development Indicators and Statistics: Tuna Fisheries of the Western and Central Pacific Ocean* (Pacific Islands Forum Fisheries Agency, 2017).
2. Bell, J. D. *et al.* Diversifying the use of tuna for food security and public health in Pacific Island countries and territories. *Mar. Policy* **51**, 584–591 (2015).
3. FFA & SPC. *Regional Roadmap for Sustainable Pacific Fisheries* (Pacific Islands Forum Fisheries Agency and Pacific Community, 2015).
4. Hare, S. R. *et al.* *The Western and Central Pacific Tuna Fishery: 2019 Overview and Status of Stocks*. Tuna Fisheries Assessment Report no. 20. (Pacific Community, 2020).
5. Lehodey, P., Bertignac, M., Hampton, J., Lewis, A. & Picaut, J. El Niño-Southern Oscillation and tuna in the western Pacific. *Nature* **389**, 715–718 (1997).
6. Lehodey, P. *et al.* in *Vulnerability of Tropical Pacific Fisheries and Aquaculture to Climate Change* (eds Bell, J. D., Johnson, J. E. & Hobday, A. J.) Ch. 8 (Secretariat of the Pacific Community, 2011).
7. Cai, W. *et al.* Increasing frequency of extreme El Niño events due to greenhouse warming. *Nat. Clim. Change* **4**, 111–116 (2014).
8. Cai, W. *et al.* ENSO and greenhouse warming. *Nat. Clim. Change* **5**, 849–859 (2015).
9. Bell, J. D., Johnson, J. E. & Hobday, A. J. (eds) *Vulnerability of Tropical Pacific Fisheries and Aquaculture to Climate Change*. (Secretariat of the Pacific Community, 2011).
10. Bell, J. D. *et al.* Mixed responses of tropical Pacific fisheries and aquaculture to climate change. *Nat. Clim. Change* **3**, 591–599 (2013).
11. Bell, J. D. *et al.* in *Impacts of Climate Change on Fisheries and Aquaculture: Synthesis of Current Knowledge, Adaptation and Mitigation Options* (eds Barange, M. *et al.*) Ch. 14 (Food and Agriculture Organisation of the United Nations, 2018).
12. Lehodey, P., Senina, I., Calmettes, B., Hampton, J. & Nicol, S. Modelling the impact of climate change on Pacific skipjack tuna population and fisheries. *Clim. Change* **119**, 95–109 (2013).
13. Senina, I. *et al.* Impact of Climate Change on Tropical Pacific Tuna and Their Fisheries in Pacific Islands Waters and High Seas Areas (Western and Central Pacific Fisheries Commission Scientific Committee, Working Paper WCPFC-SC14-2018/ EB-WP-01, 2018).
14. SPC. *Implications of Climate-driven Redistribution of Tuna on Pacific Island Economies*. SPC Policy Brief 32/2019. (Pacific Community, 2019).
15. Lehodey, P., Senina, I & Murtugudde, R. A spatial ecosystem and population dynamics model (SEAPODYM) – modelling of tuna and tuna-like populations. *Prog. Oceanogr.* **78**, 304–318 (2008).

16. Lehodey, P., Murtugudde, R. & Senina, I. Bridging the gap from ocean models to population dynamics of large marine predators: a model of mid-trophic functional groups. *Prog. Oceanogr.* **84**, 69–84 (2010).
17. Senina, I., Sibert, J. & Lehodey, P. Parameter investigation for basin-scale ecosystem-linked population models of large pelagic predators: Application to skipjack tuna. *Prog. Oceanogr.* **78**, 319–335 (2008).
18. McNamara, K. E. *et al.* An assessment of community-based adaptation initiatives in the Pacific Islands. *Nat. Clim. Change* **10**, 628–639 (2020).
19. Pecl, G. T. *et al.* Biodiversity redistribution under climate change: Impacts on ecosystems and human well-being. *Science* **355** (6332), eaai9214 (2017).
20. Lam, V. W. Y. *et al.* Climate change, tropical fisheries and prospects for sustainable development. *Nat. Rev. Earth Environ.* **1**, 440–454 (2020).
21. MRAG. *Towards the Quantification of Illegal, Unreported and Unregulated (IUU) Fishing in the Pacific Islands Region* (MRAG Asia Pacific, 2016).
22. Pinsky, M. L. *et al.* Preparing ocean governance for species on the move. *Science* **360** (6394), 1189–1191 (2018).
23. Oremus, K. L. *et al.* Governance challenges for tropical nations losing fish species due to climate change. *Nat. Sustainability* **3**, 277–280 (2020).
24. UNGA. *United Nations General Assembly Resolution 72/249* (United Nations, 2017).
25. Quirk, G. C. & Harden-Davies, H. R. Cooperation, Competence and Coherence: The Role of Regional Ocean Governance in the South West Pacific for the Conservation and Sustainable Use of Biodiversity beyond National Jurisdiction. *Int. J. Mar. Coast. Law* **32**, 672–708 (2017).
26. Haas, B., Haward, M., McGee, J. & Fleming, A. Regional fisheries management organizations and the new biodiversity agreement: Challenge or opportunity? *Fish Fish.* **22**, 226–231 (2021).
27. Tladi, D. The proposed implementing agreement: Options for coherence and consistency in the establishment of protected areas beyond national jurisdiction. *Int. J. Mar. Coast. Law.* **30**, 654–673 (2015).
28. Friedman, A. Beyond “not undermining”: possibilities for global cooperation to improve environmental protection in areas beyond national jurisdiction. *ICES Journal of Marine Science* **76**, 452–456 (2019).
29. Robinson, M. *Climate Justice* (Bloomsbury, 2018).
30. Robinson, M. & Shine, T. Achieving a climate justice pathway to 1.5 °C. *Nat. Clim. Change* **8**, 564–569 (2018).
31. Cheung, W. W. L., Reygondeau, G., Frölicher, T. L. Large benefits to marine fisheries of meeting the 1.5°C global warming target. *Science* **354** (6319), 1591–1594 (2016).
32. WCPFC. *Convention on the Conservation and Management of Highly Migratory Fish Stocks in the Western and Central Pacific Ocean* (WCPFC, 2004).
33. UNFSA. *Agreement for the Implementation of the Provisions of the United Nations Convention on the Law of the Sea of 10 December 1982 Relating to the Conservation and Management of Straddling Fish Stocks and Highly Migratory Fish Stocks* (United Nations, 1995).
34. WCPFC. *CMM 2018-01 Conservation and Management Measure for Bigeye, Yellowfin and Skipjack Tuna in the Western and Central Pacific Ocean*. Fifteenth Regular Session of the Western and Central Pacific Fisheries Commission. Honolulu, USA (WCPFC, 2018).
35. Seto, K. *et al.* Resource allocation in transboundary tuna fisheries: a global analysis. *Ambio* **50**, 242–259 (2021).

36. WCPFC, *Report of the Sixteenth Regular Session of the Western and Central Pacific Fisheries Commission*. Western and Central Pacific Fisheries Commission. Honolulu, USA (WCPFC, 2019).
37. Gardiner, S. M. Climate justice. In: *The Oxford Handbook of Climate Change and Society* EJ. S. Dryzek, R. B. Norgaard & D. Schlosberg, eds. (Oxford University Press, 2011).
38. Pellow, D. N. *What is Critical Environmental Justice?* (John Wiley & Sons, 2017).
39. Mikulewicz, M. Politicizing vulnerability and adaptation: On the need to democratize local responses to climate impacts in developing countries. *Climate and Development* **10**, 18–34 (2018).
40. Meehl G. A., Hu, A. & Teng, H. Initialized decadal prediction for transition to positive phase of the Interdecadal Pacific Oscillation. *Nature Communications* **7**, 11718 (2016).
41. Grewe, P. M. *et al.* Evidence of discrete yellowfin tuna (*Thunnus albacares*) populations demands rethink of management for this globally important resource. *Sci. Rep.* **5**, 16916 (2015).
42. Anderson, G., Lal, M., Hampton, J., Smith, N. & Rico, C. Close kin proximity in yellowfin tuna (*Thunnus albacares*) as a driver of population genetic structure in the tropical western and central Pacific Ocean. *Front. Mar. Sci.* **6**, 341 (2019).
43. Moore, B. R. *et al.* Defining the stock structures of commercial tunas in the Pacific Ocean I: Current knowledge and key uncertainties. *Fish. Res.* **230**, 105525 (2020).
44. Moore, B. R. *et al.* Defining the stock structures of commercial tunas in the Pacific Ocean II: Sampling considerations and future directions. *Fish. Res.* **230**, 105524 (2020).
45. Gaines, S. D. *et al.* Improved fisheries management could offset many negative effects of climate change. *Sci Adv.* **4**, eaao1378 (2018).
46. Madec, G. *et al.* NEMO ocean engine (Version v3.6-patch). Notes Du Pôle De Modélisation De L'institut Pierre-Simon Laplace (IPSL). *Zenodo* (2017).
47. Aumont, O., Ethé, C., Tagliabue, A., Bopp, L. & Gehlen, M. PISCES-v2: an ocean biogeochemical model for carbon and ecosystem studies. *Geosci. Model Dev.* **8**, 2465–2513 (2015).
48. Lee, Y. J. *et al.* Net primary productivity estimates and environmental variables in the Arctic Ocean: An assessment of coupled physical-biogeochemical models. *J. Geophys. Res.-Oceans* **121**, 8635–8669 (2016).
49. Dussin, R., Barnier, B., & Brodeau, L. The making of Drakkar forcing set DFS5. DRAKKAR/MyOcean Report 05-10-14 (2014).
50. Garcia, H. E. *et al.* World Ocean Atlas 2009, Volume 4: Nutrients (Phosphate, Nitrate, Silicate) (US Government Printing Office, 2010).
51. Menkes, C. E. *et al.* Global impact of tropical cyclones on primary production. *Global Biogeochem. Cycles* **30**, 767–786 (2016).
52. Nicol, S. *et al.* Oceanographic characterisation of the Pacific Ocean and the potential impact of climate variability on tuna stocks and tuna fisheries. *SPC Fish. Newsl.* **145**, 37–48 (2014).
53. Taylor, K. E., Stouffer, R. J. & Meehl, G. A. An overview of CMIP5 and the experiment design. *Bull. Amer. Meteor. Soc.* **93**, 485–498 (2012).
54. Bellenger, H., Guilyardi, E., Leloup, J., Lengaigne, M. & Vialard, J. ENSO representation in climate models: from CMIP3 to CMIP5. *Clim. Dyn.* **42**, 1999–2018 (2014).
55. Dufresne, J-L. *et al.* Climate change projections using the IPSL-CM5 Earth System Model: from CMIP3 to CMIP5. *Clim. Dyn.* **40**, 2123–2165 (2013).
56. Watanabe, S. *et al.* MIROC-ESM 2010: model description and basic results of CMIP5-20c3m experiments. *Geosci. Model Dev.* **4**, 845–872 (2011).
57. Dunne, J. P. *et al.* GFDL's ESM2 Global Coupled Climate–Carbon Earth System Models. Part I: Physical Formulation and Baseline Simulation Characteristics. *J. Climate* **25**, 6646–6665 (2012).

58. Mauritsen, T. *et al.* Tuning the climate of a global model. *J. Adv. Modeling Earth Syst.* **4**, (2012).
59. Brown, J. R. *et al.* South Pacific Convergence Zone dynamics, variability and impacts in a changing climate. *Nat. Rev. Earth Environ.* **1**, 530–543 (2020).
60. Dutheil, C. *et al.* Impact of surface temperature biases on climate change projections of the South Pacific Convergence Zone. *Clim. Dyn.* **53**, 3197–3219 (2019).
61. Brown, J. N., Langlais, C. & Maes, C. Zonal structure and variability of the Western Pacific dynamic warm pool edge in CMIP5. *Clim. Dyn.* **42**, 3061–3076 (2014).
62. Lehodey, P. *et al.* Optimization of a micronekton model with acoustic data. *ICES J. Mar. Sci.* **72**, 1399–1412 (2015).
63. Lehodey P. *et al.* Modelling the impact of climate change including ocean acidification on Pacific yellowfin tuna (Western and Central Pacific Fisheries Commission Scientific Committee, Working Paper WCPFC- SC13-2017/EB-WP-01, 2017).
64. Senina, I., Lehodey, P., Hampton, J. & Sibert, J. Quantitative modelling of the spatial dynamics of South Pacific and Atlantic albacore tuna populations. *Deep Sea Res. II* **175** 104667 (2020).
65. Senina, I., Lehodey, P., Sibert, J. & Hampton J. Integrating tagging and fisheries data into a spatial population dynamics model to improve its predictive skills. *Can. J. Aquat. Fish. Sci.* **77**, 576–593 (2020).
66. Lehodey, P., Senina, I., Sibert, J., Bopp, L., Calmettes, B., Hampton, J. & Murtugudde, R. Preliminary forecasts of population trends for Pacific bigeye tuna under the A2 IPCC scenario. *Prog. Oceanogr.* **86**, 302–315 (2010).
67. Lehodey, P., Senina, I., Nicol, S. & Hampton, J. Modelling the impact of climate change on South Pacific albacore tuna. *Deep Sea Res. II* **113**, 246–259 (2015).
68. Herger, N., Sanderson, B. M. & Knutti, R. Improved pattern scaling approaches for the use in climate impact studies. *Geophys. Lett.* **42**, 3486–3494 (2015).
69. Aqorau, T. Recent developments in Pacific tuna fisheries: The Palau Arrangement and the Vessel Day Scheme. *Int. J. Mar. Coast. Law* **24**, 557–581 (2009).
70. Clark, S. *et al.* The Parties to the Nauru Agreement (PNA) ‘Vessel Day Scheme’: A cooperative fishery management mechanism assisting member countries to adapt to climate variability and change. In: *Adaptive Management of Fisheries in Response to Climate Change* (T. Bahri, M. Vasconcellos, D. J. Welch, J. Johnson, R. I. Perry, X. Ma, R. Sharma, eds. (Food and Agriculture Organisation of the United Nations, Fisheries and Aquaculture Technical Paper 667, 2021).
71. Aqorau, T., Bell, J. & Kittinger, J. N. Good governance for migratory species. *Science* **361** (6408), 1208–1209 (2018).
72. PIFS. *Pacific Islands Regional Ocean Policy* (Pacific Islands Forum Secretariat, 2002).
73. Ducharme Barth, N. *et al.* Stock assessment of bigeye tuna in the western and central Pacific Ocean. (Western and Central Pacific Fisheries Commission Scientific Committee, Working Paper WCPFC-SC16-2020/SA-WP-03, 2020).
74. Vincent, M., Pilling, G. & Hampton, J. Stock assessment of skipjack tuna in the western and central Pacific Ocean. (Western and Central Pacific Fisheries Commission Scientific Committee, Working Paper WCPFC-SC15-2019/SA-WP-05, 2019)
75. Vincent, M. *et al.* Stock assessment of yellowfin tuna in the western and central Pacific Ocean. (Western and Central Pacific Fisheries Commission Scientific Committee, Working Paper WCPFC-SC16-2020/SA-WP-04, 2020).
76. Clark, S. Purse seine fishing activity in PNA waters. (Western and Central Pacific Fisheries Commission Scientific Committee, Information Paper WCPFC-SC15-2019/ST-IP-04, 2019).



77. SPC. Estimates of Annual Catches in the WCPFC Statistical Area. (Western and Central Pacific Fisheries Commission Scientific Committee, Information Paper WCPFC-SC15-2019/ST-IP-01, 2019).
78. Ganachaud, A. *et al.* Projected changes in the tropical Pacific Ocean of importance to tuna fisheries. *Clim. Change* **119**, 163–179 (2013).
79. Hennessy, K. *et al.* Projections based on global climate models. In: *Climate Change in the Pacific: Scientific Assessment and New Research. Volume 1: Regional Overview*. (Australian Bureau of Meteorology and CSIRO, 2011).
80. Brown, J. N., Langlais, C. & Sen Gupta, A. Projected sea surface temperature changes in the equatorial Pacific relative to the Warm Pool edge. *Deep Sea Res. II* **113**, 47–58 (2015).
81. Hu, D. *et al.* Pacific western boundary currents and their roles in climate. *Nature* **522**, 299–308 (2015).
82. Sen Gupta, A., Ganachaud, A., McGregor, S., Brown, J. N. & Muir, L. Drivers of the projected changes to the Pacific Ocean equatorial circulation. *Geophys. Res. Lett.* **39**, L09605 (2012).
83. Sen Gupta, A., McGregor, S., van Sebille, E., Ganachaud, A., Brown, J. & Santoso, A. Future changes to the Indonesian Throughflow and Pacific circulation: The differing role of wind and deep circulation changes. *Geophys. Res. Lett.* **43**, 1669–1678 (2016).
84. Cabré, A., Marinov, I., Bernardello, R. & Bianchi, D. Oxygen minimum zones in the tropical Pacific across CMIP5 models: mean state differences and climate change trends. *Biogeosciences* **12**, 5429–5454 (2015).
85. Takano, Y., Ito, T. & Deutsch, C. Projected centennial oxygen trends and their attribution to distinct ocean climate forcings. *Glob. Biogeochem. Cycles* **32**, 1329–1349 (2018).
86. PIFS. *Communiqué of the Fiftieth Pacific Islands Forum, Funafuti, Tuvalu* (Pacific Islands Forum Secretariat, 2019).
87. FFA. Climate Change. (Western and Central Pacific Fisheries Commission, Delegation Paper WCPFC16-2019-DP04, 2019).
88. WCPFC. *Resolution 2019-01: Resolution on Climate Change as it Relates to the Western and Central Pacific Fisheries Commission* (Western and Central Pacific Fisheries Commission, 2019).
89. Allain, V., Macdonald, J., Nicol, S., Scutt Phillips, J. & Vourey, E. Ecosystem and climate indicators for consideration within the WCPO. (Western and Central Pacific Fisheries Commission Scientific Committee, Information Paper WCPFC-SC16-2020/EB-IP-07, 2020).
90. Bertignac, M., Lehodey, P. & Hampton, J. A spatial population dynamics simulation model of tropical tunas using a habitat index based on environmental parameters. *Fish. Oceanogr.* **7**, 326–334 (1998).
91. Lehodey, P. *et al.* Predicting skipjack tuna forage distributions in the Equatorial Pacific using a coupled dynamical bio-geochemical model. *Fish. Oceanogr.* **7**, 317–325 (1998).
92. Lehodey, P., Chai, F. & Hampton, J. Modelling climate-related variability of tuna populations from a coupled ocean-biogeochemical-populations dynamics model. *Fish. Oceanogr.* **12**, 483–494 (2003).
93. Lehodey, P. The pelagic ecosystem of the tropical Pacific Ocean: dynamic spatial modelling and biological consequences of ENSO. *Prog. Oceanogr.* **49**, 439–468 (2001).
94. Sibert, J., Senina, I., Lehodey, P. & Hampton, J. Shifting from marine reserves to maritime zoning for conservation of Pacific bigeye tuna (*Thunnus obesus*). *Proc. Natl. Acad. Sci. USA* **109**, 18221–18225 (2012).

95. Dragon, A. C., Senina, I., Conchon, A., Titaud, O., Arrizabalaga, H. & Lehodey, P. Modeling spatial population dynamics of North Atlantic Albacore tuna under the influence of both fishing and climate variability. *Can. J. Fish. Aquat. Sci.* **72**, 864–878 (2015).
96. UNGA (United Nations General Assembly). Revised draft text of an agreement under the United Nations Convention on the Law of the Sea on the conservation and sustainable use of marine biological diversity of areas beyond national jurisdiction. A/CONF.232/2020/3 of 18<sup>th</sup> November 2019.
97. Levin, L. *et al.* Climate change considerations are fundamental to management of deep-sea resource extraction. *Glob. Change Biol.* **26**, 4664–4678 (2020).
98. Gütschow, J., Jeffery, L. & Gieseke, R. The PRIMAP-hist national historical emissions time series (1850–2016). V. 2.0. GFZ Data Services (2019).
99. Tsamenyi, M. & Hanich, Q. Fisheries jurisdiction under the Law of the Sea Convention: rights and obligations in maritime zones under the sovereignty of Coastal States. *Int. J. Mar. Coast. Law* **27**, 783–793 (2012).
100. United Nations. *Transforming our World: The 2030 Agenda for Sustainable Development* (United Nations, 2015).
101. Seto, K. & Hanich, Q. The Western and Central Pacific Fisheries Commission and the New Conservation and Management Measure for Tropical Tunas. *Asia-Pacific J. Ocean Law Policy* **3**, 146–151 (2018).
102. Pasisi, C. *Climate-Fragility Risk Brief: The Pacific Islands Region*. Climate Security Expert Network (Adelphi 2019).
103. Frommel, A. *et al.* Ocean acidification has lethal and sub-lethal effects on larval development of yellowfin tuna, *Thunnus albacares*. *J. Exp. Mar. Biol. Ecol.* **482**, 18–24 (2016).
104. Fu, W., Randerson, J. T. & Moore, J. K. Climate change impacts on net primary production (NPP) and export production (EP) regulated by increasing stratification and phytoplankton community structure in the CMIP5 models. *Biogeosciences* **13**, 5151–5170 (2016).
105. Matear, R. J., Chamberlain, M. A., Sun, C. & Feng, M. Climate change projection for the western tropical Pacific Ocean using a high-resolution ocean model: implications for tuna fisheries. *Deep Sea Res. II* **113**, 22–46 (2015).
106. Laufkötter, C. *et al.* Drivers and uncertainties of future global marine primary production in marine ecosystem models. *Biogeosciences* **12**, 6955–6984 (2015).
107. Bopp, L., *et al.* Multiple stressors of ocean ecosystems in the 21st century: Projections with CMIP5 models. *Biogeosciences* **10**, 6225–6245 (2013).
108. Schmidtko, S., Stramma, L. & Visbeck, M. Decline in global oceanic oxygen content during the past five decades. *Nature* **542**, 335–339 (2017).
109. Long, M. C., Deutsch, C. & Ito, T. Finding forced trends in oceanic oxygen. *Global Biogeochemical Cycles* **30**, 381–397 (2016).
110. Duteil, O., Böning, C. W. & Oschlies, A. Variability in subtropical-tropical cells drives oxygen levels in the tropical Pacific Ocean, *Geophys. Res. Lett.* **41**, 8926–8934 (2014).
111. Brill, R. A review of temperature and oxygen tolerance studies of tunas pertinent to fisheries oceanography, movement models and stock assessments. *Fish. Oceanogr.* **3**, 204–216 (1994).
112. Zhang, Z., Ren, B. & Zheng, J. A unified complex index to characterize two types of ENSO simultaneously. *Sci. Rep.* **9**, 8373 (2019).

## Supplementary Figures

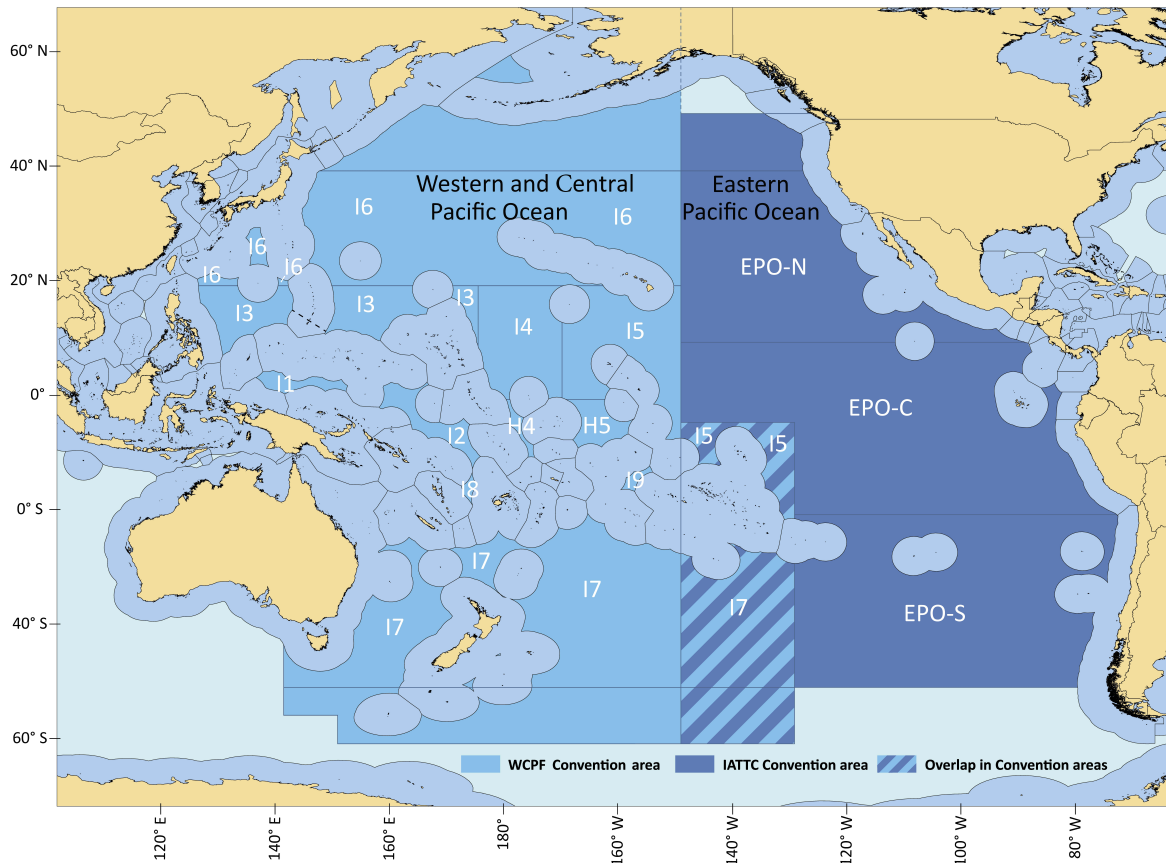

**Supplementary Figure 1.** Map of the Pacific Ocean basin showing the locations of the high-seas areas referred to in this study. The exclusive economic zones for all Pacific Small Island Developing States, and other coastal States, are also shown.

### **High-seas areas in the Western and Central Pacific Fisheries (WCPF) Convention Area.**

**I1:** ‘Doughnut hole’ between Papua New Guinea and Federated States of Micronesia; **I2:** Doughnut hole between Federated States of Micronesia, Solomon Islands, Kiribati, Marshall Islands, Nauru and Tuvalu; **I3:** Area east of the Philippines to Guam above Federated States of Micronesia, and around Marshall Islands, up to 20°N and west of 175°E; **I4:** Area around Marshall Islands and Kiribati from the Equator up to 20°N and east of 175°E to 170°W; **I5:** Area around Line Islands group of Kiribati from the Equator up to 20°N, east of 170°W to 150°W and south of the Equator to 20°S from 155°W; **I6:** Remainder of Western and Central Pacific Convention Area in the Northern Hemisphere as far as 40°N **I7:** Remainder of Western and Central Pacific Convention Area in the Southern Hemisphere as far as 50°S; **I8:** Area bordered by Fiji, Solomon Islands and Vanuatu; **I9:** International waters between Cook Islands and French Polynesia; **H4:** Area between Tuvalu, Phoenix Islands Group of Kiribati and Tokelau, from the equator to 10°S and east of 175°E to 170°W; **H5:** Area between Phoenix Islands and Line Islands Groups in Kiribati, from the Equator to 10°S, east of 170°W to 155°W.

### **High-seas areas in the Inter-American Tropical Tuna Commission (IATTC) Convention**

**Area.** **EPO-C:** Area east of Americas, as far as 150°W, bound by 10°N and 20°S and Area I5; **EPO-S:** Area east of Americas, as far as 130°W, below EPO-C and above to 50°S; **EPO-N:** Area east of Americas, as far as 150°W, above EPO-C and below 40°N.

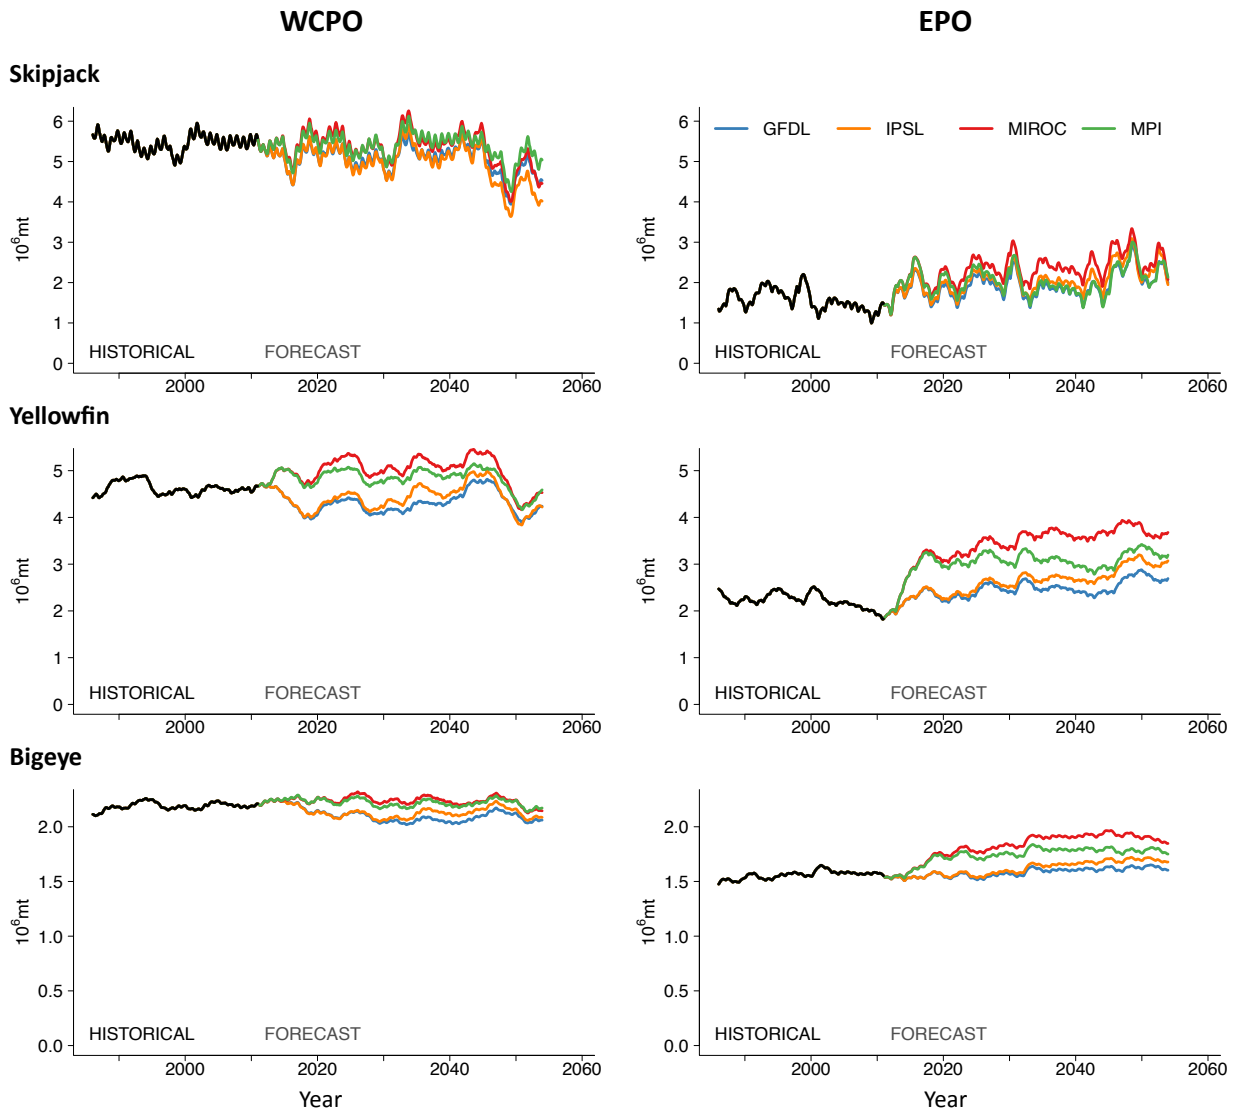

**Supplementary Figure 2.** Total biomass of adult skipjack, yellowfin and bigeye tuna predicted by SEAPODYM in the Western and Central Pacific Ocean (WCPO) (120°E–150°W; 45°S–50°N) and Eastern Pacific Ocean (EPO) (150°W–70°W; 45°S–50°N) during the historical time period (1980–2010), and forecast time period (2011–2053) based on four climate model forcings under the RCP8.5 emissions scenario.

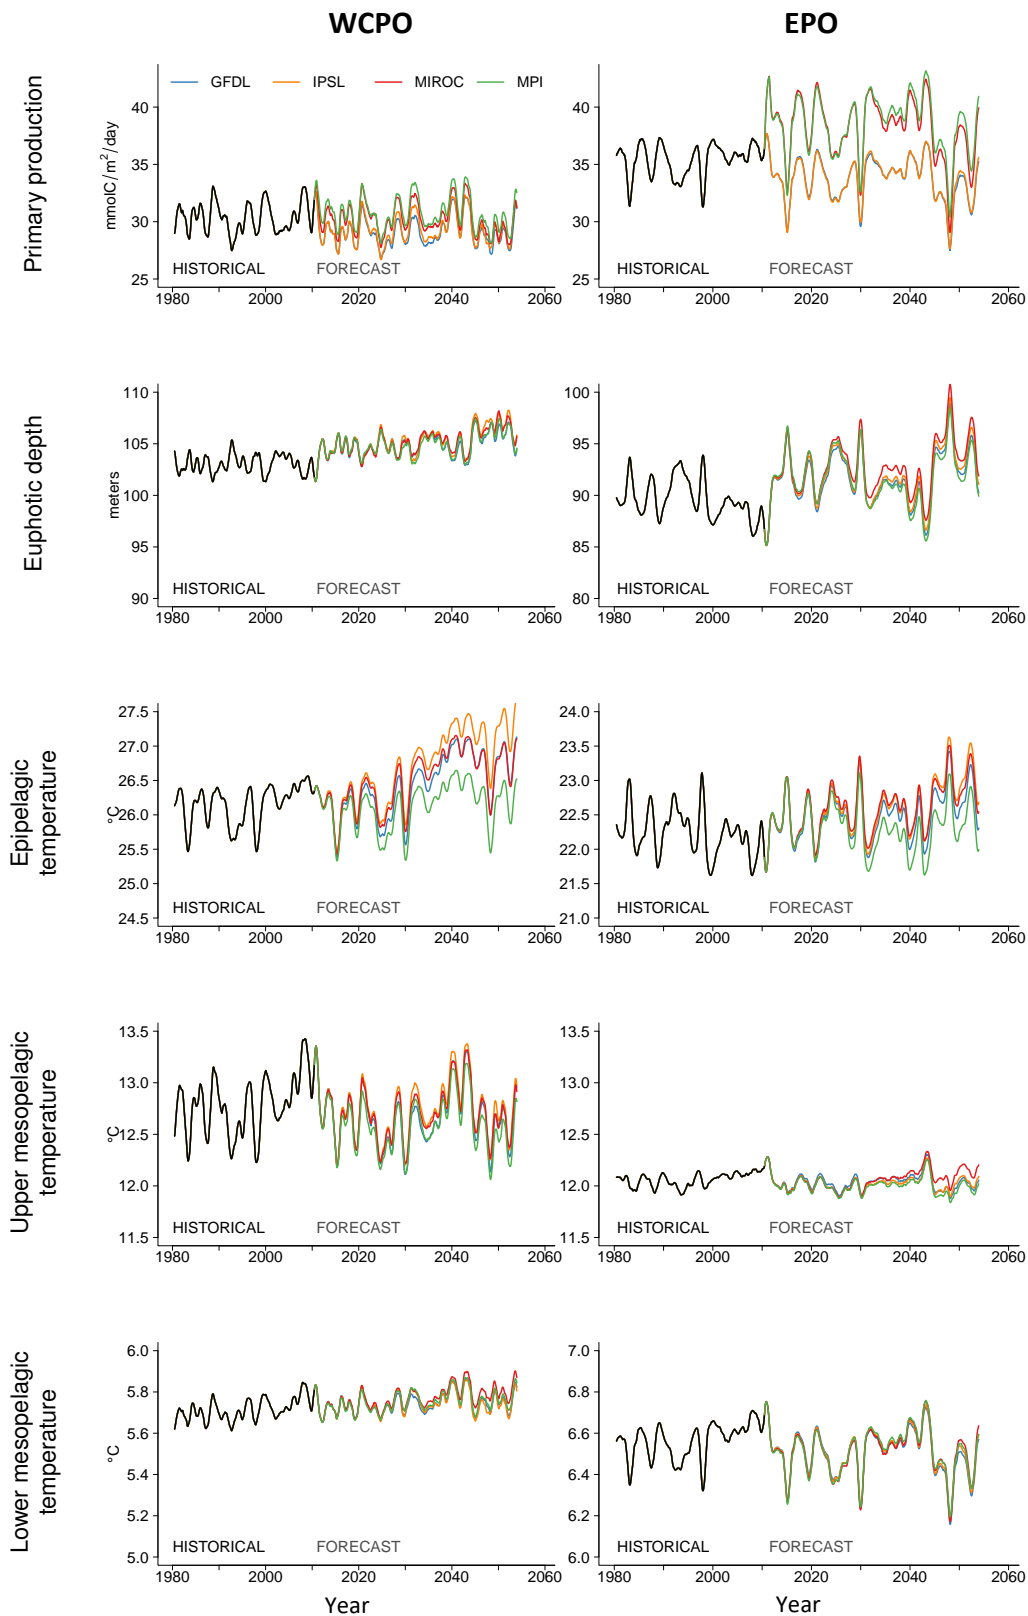

**Supplementary Figure 3.** Mean values of key environmental forcing variables in the tropical Western and Central Pacific Ocean (WCPO) (120°E–150°W, 20°S–20°S) and tropical Eastern Pacific Ocean (EPO) (150°W–70°W, 20°S–20°N). The historical simulation of NEMO-PISCES models (black line) and forecasts from four climate models: GFDL-derived (blue), IPSL-derived (orange), MIROC-derived (red) and MPI-derived (green), are plotted as 12-month moving averages. Note the difference in the y axes for some variables for the two ocean areas.

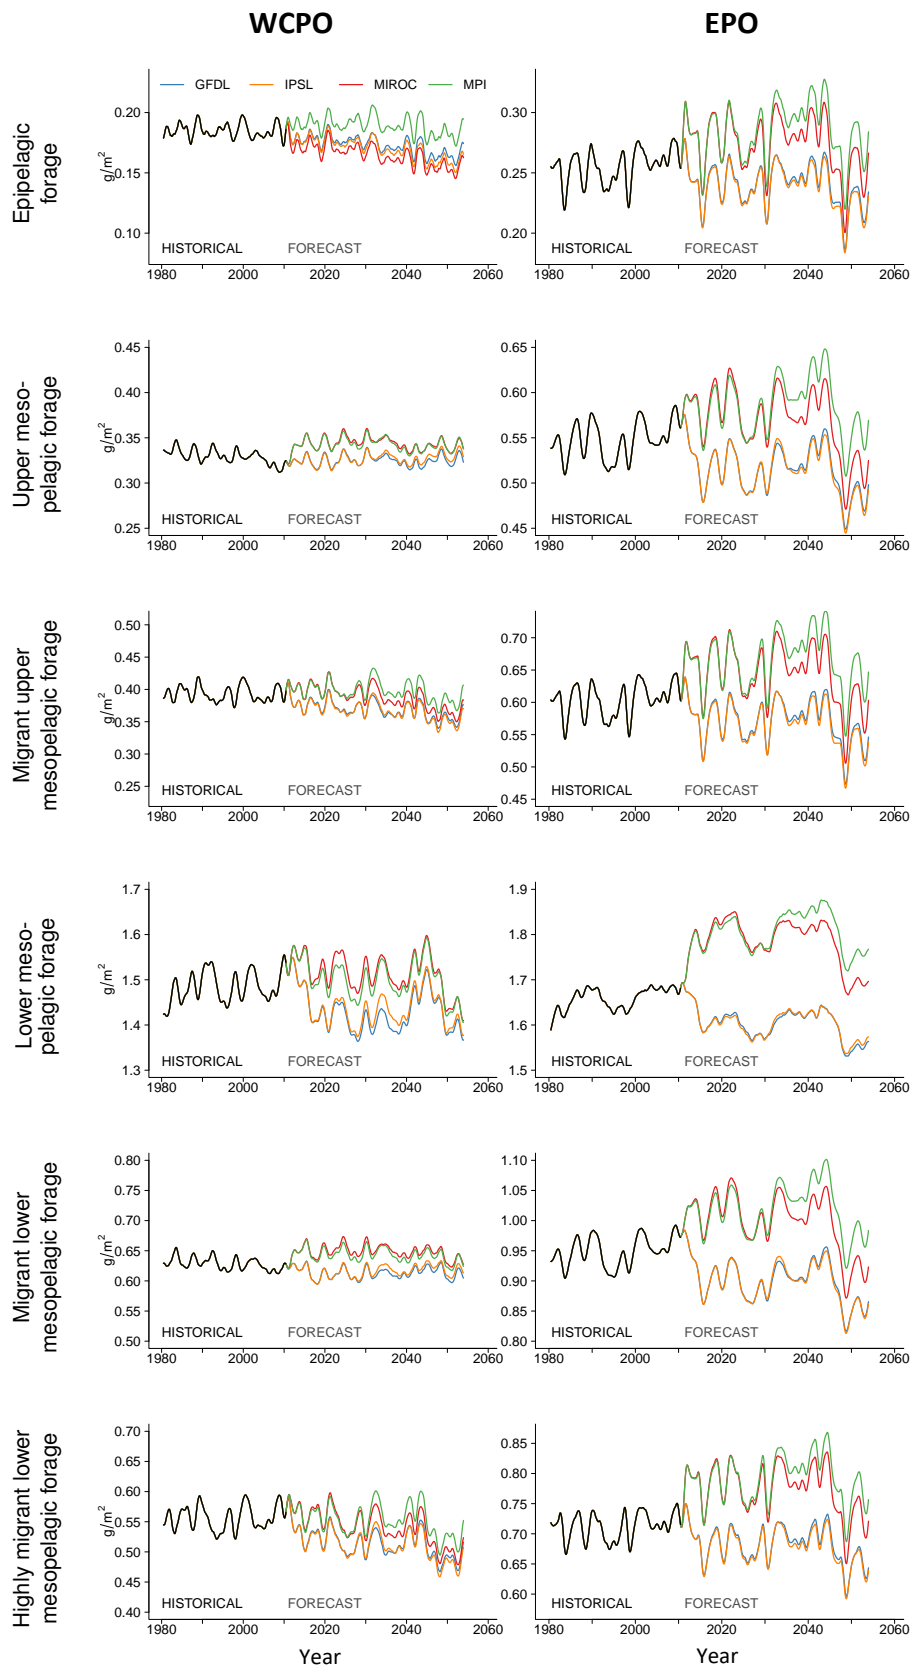

**Supplementary Figure 4.** Mean values of tuna prey (epipelagic forage and six functional groups of micronekton) in the tropical Western and Central Pacific Ocean (WCPO) (120°E–150°W, 20°S–20°S) and tropical Eastern Pacific Ocean (EPO) (150° W–70°W, 20°S–20°N). The historical simulation (black line) and forecasts from four NEMO-PISCES models: GFDL-derived (blue), IPSL-derived (orange), MIROC-derived (red) and MPI-derived (green), are plotted as 12-month moving averages. Note the differences in y axes for all variables between the two ocean areas (see Methods for details).

**a) Change in biomass**

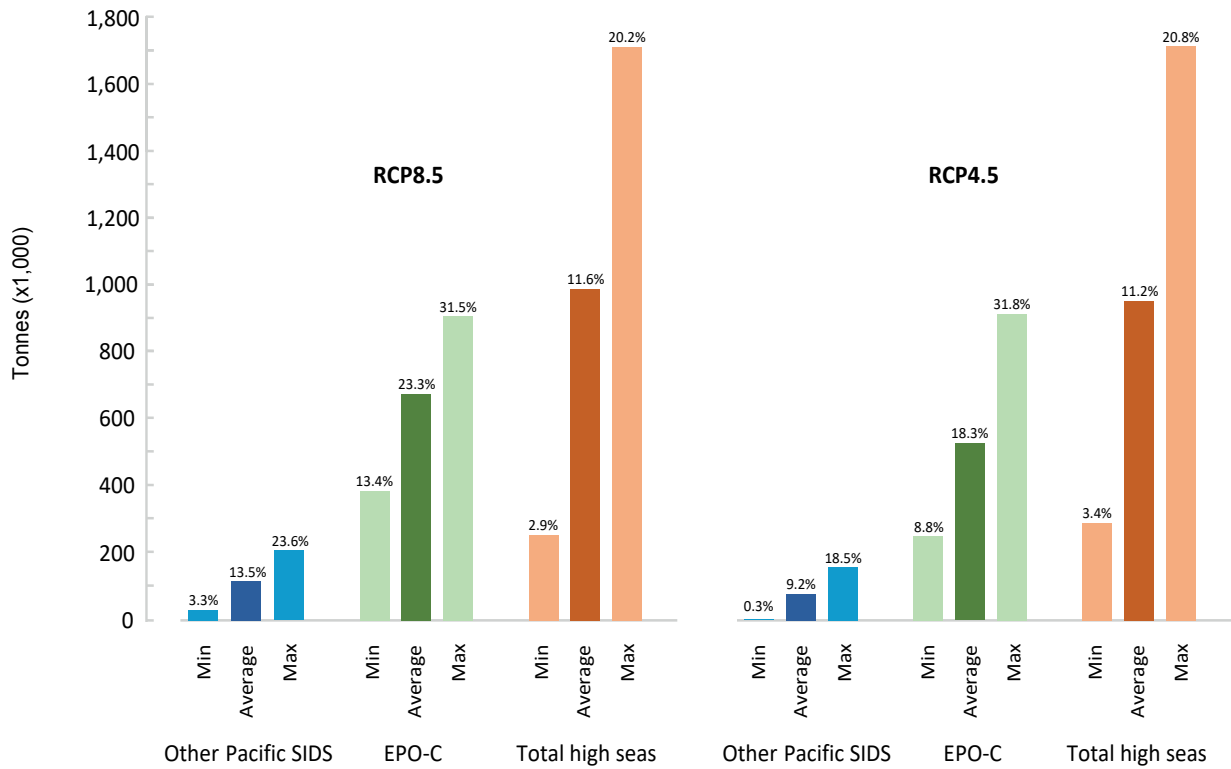

**b) Change in catch**

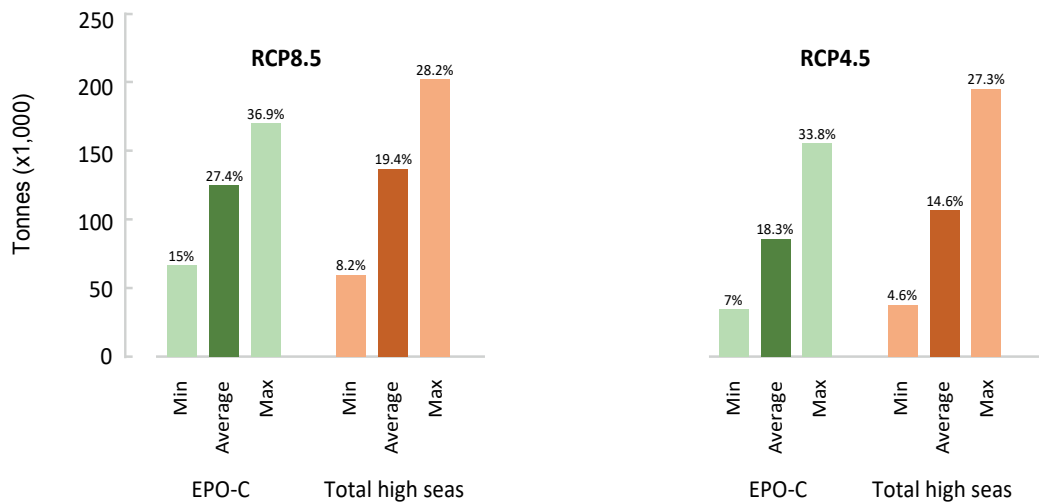

**Supplementary Figure 5. a)** Projected average (and maximum/minimum) changes of total biomass of skipjack, yellowfin and bigeye tuna in the combined exclusive economic zones (EEZs) of other Pacific Small Island Developing States (Other Pacific SIDS) (i.e., American Samoa, Fiji, French Polynesia, Guam, New Caledonia, Niue, Northern Mariana Islands, Pitcairn Islands, Samoa, Tonga, Vanuatu, Wallis and Futuna), high-seas area EPO-C, and in all high-seas areas combined, by 2050 under RCP8.5 and RCP4.5 relative to 2011–2020 (see also Supplementary Tables 6, 8, 9, 10); and **b)** projected average (and maximum/minimum) changes in purse-seine catch in high-seas area EPO-C, and in all high-seas areas combined, by 2050 under RCP8.5 and RCP4.5 relative to 2011–2020 (see also Supplementary Tables 12, 14).

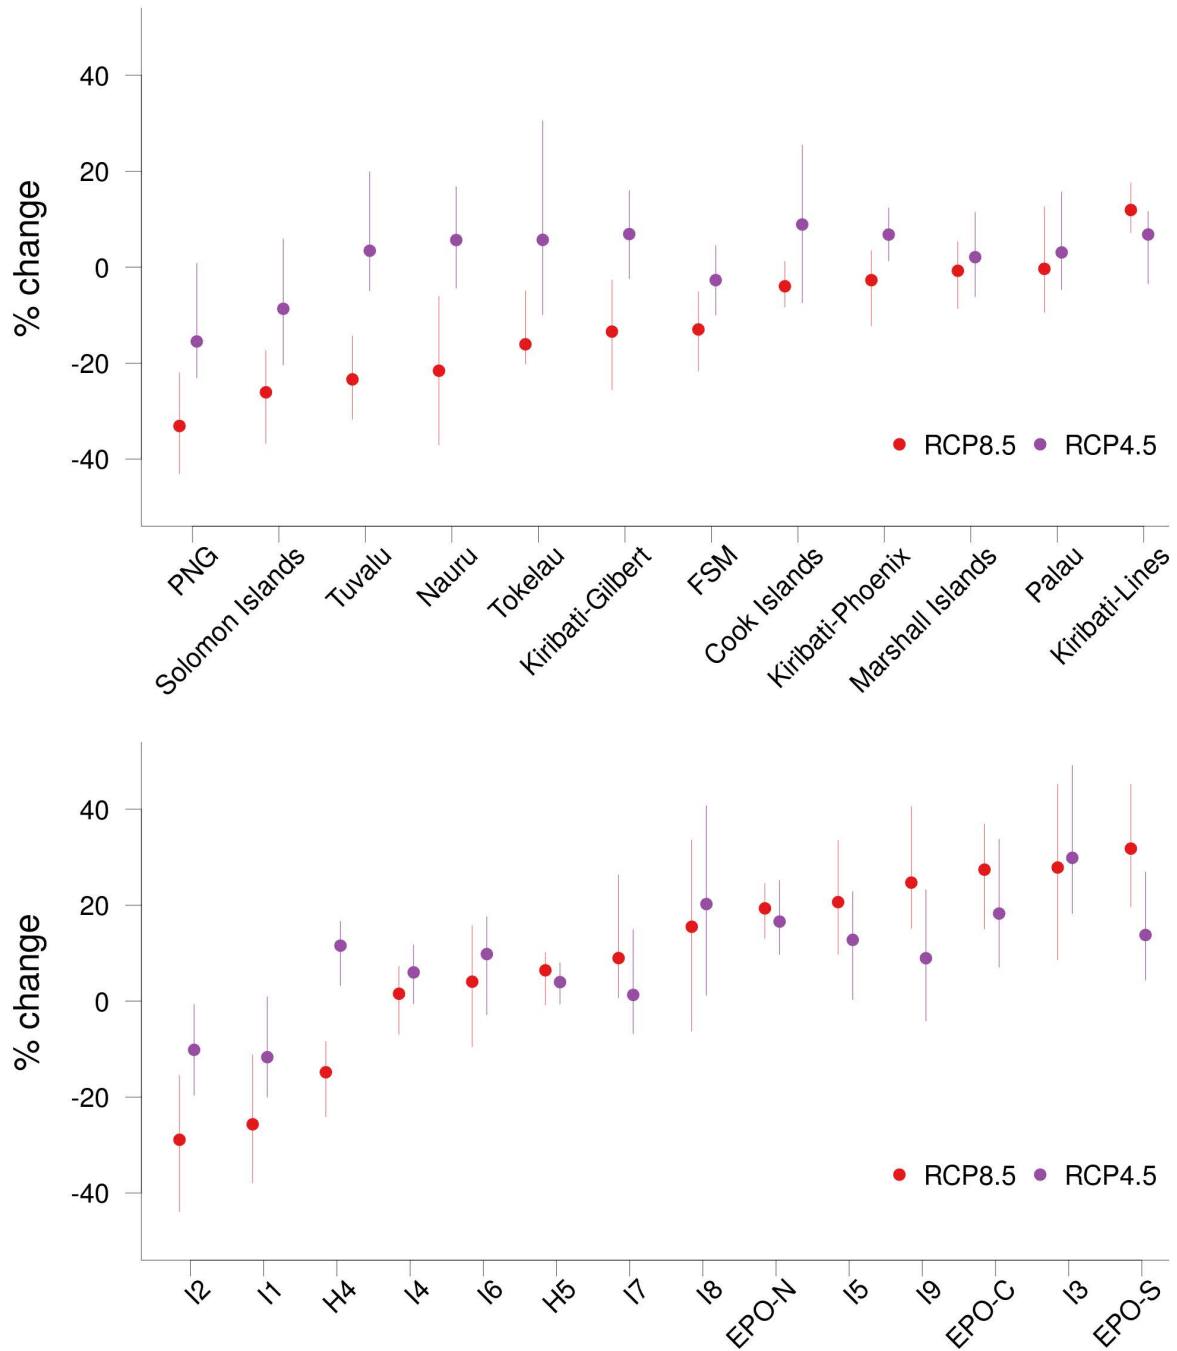

**Supplementary Figure 6.** Mean percentage change (circles) in purse-seine catch under the RCP8.5 and RCP4.5 emission scenarios by 2050, relative to the period 2011–2020 in the individual exclusive economic zones (EEZs) of the 10 tuna-dependent Pacific Small Island Developing States (top); and high-seas areas in the Western and Central Pacific Ocean and Eastern Pacific Ocean (see Supplementary Figure 1) (bottom). The range of percentage changes in purse-seine catch for each EEZ and high-seas areas derived from the four global climate models is also shown (see also Supplementary Tables 11–14).



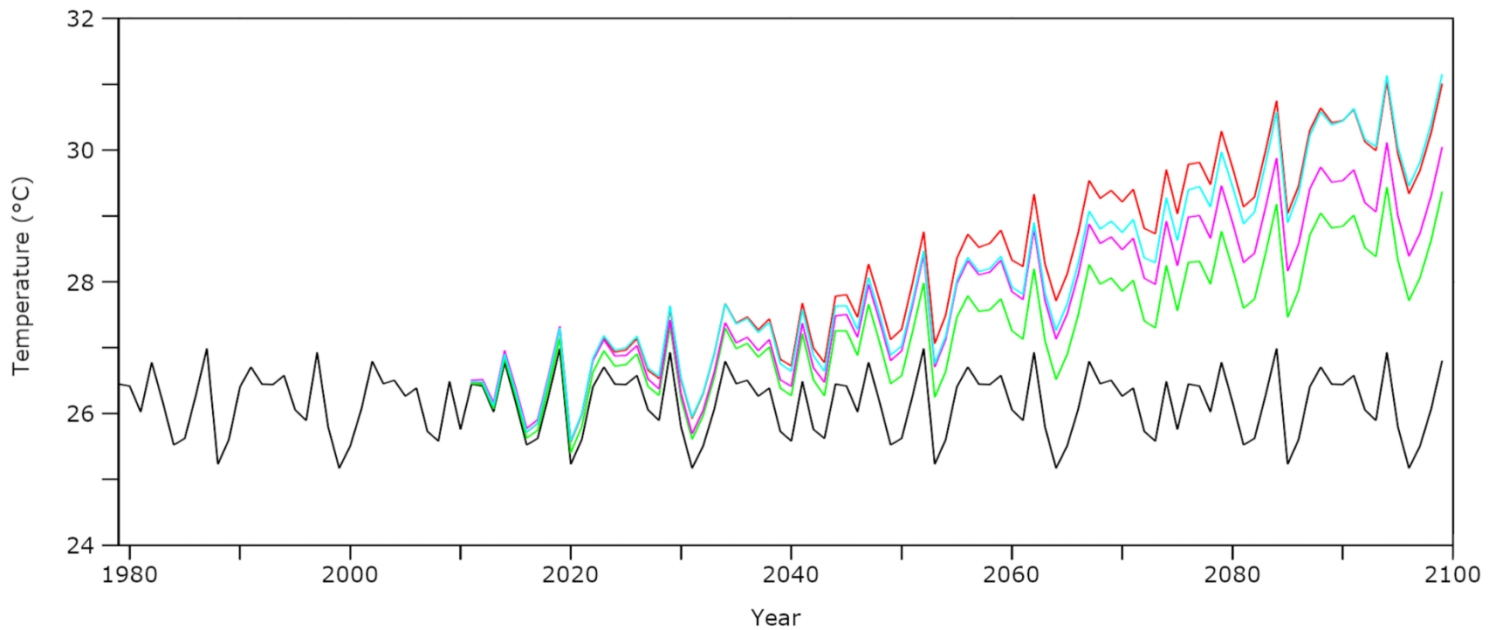

**Supplementary Figure 7.** Example of an atmospheric variable reconstructed by the pseudo-anomaly method. Time-series of the annual, mean air temperature at 2 m (averaged over the nino3.4 (5°N–5°S, 170°W–120°W box) (<https://climatedataguide.ucar.edu/climate-data/nino-sst-indices-nino-12-3-34-4-oni-and-tni>) for the DFS5.2 forcing set (black), and forcing built following the correction method for the IPSL (red), GFDL (green), MIROC (blue) and MPI (pink) Earth System Models.

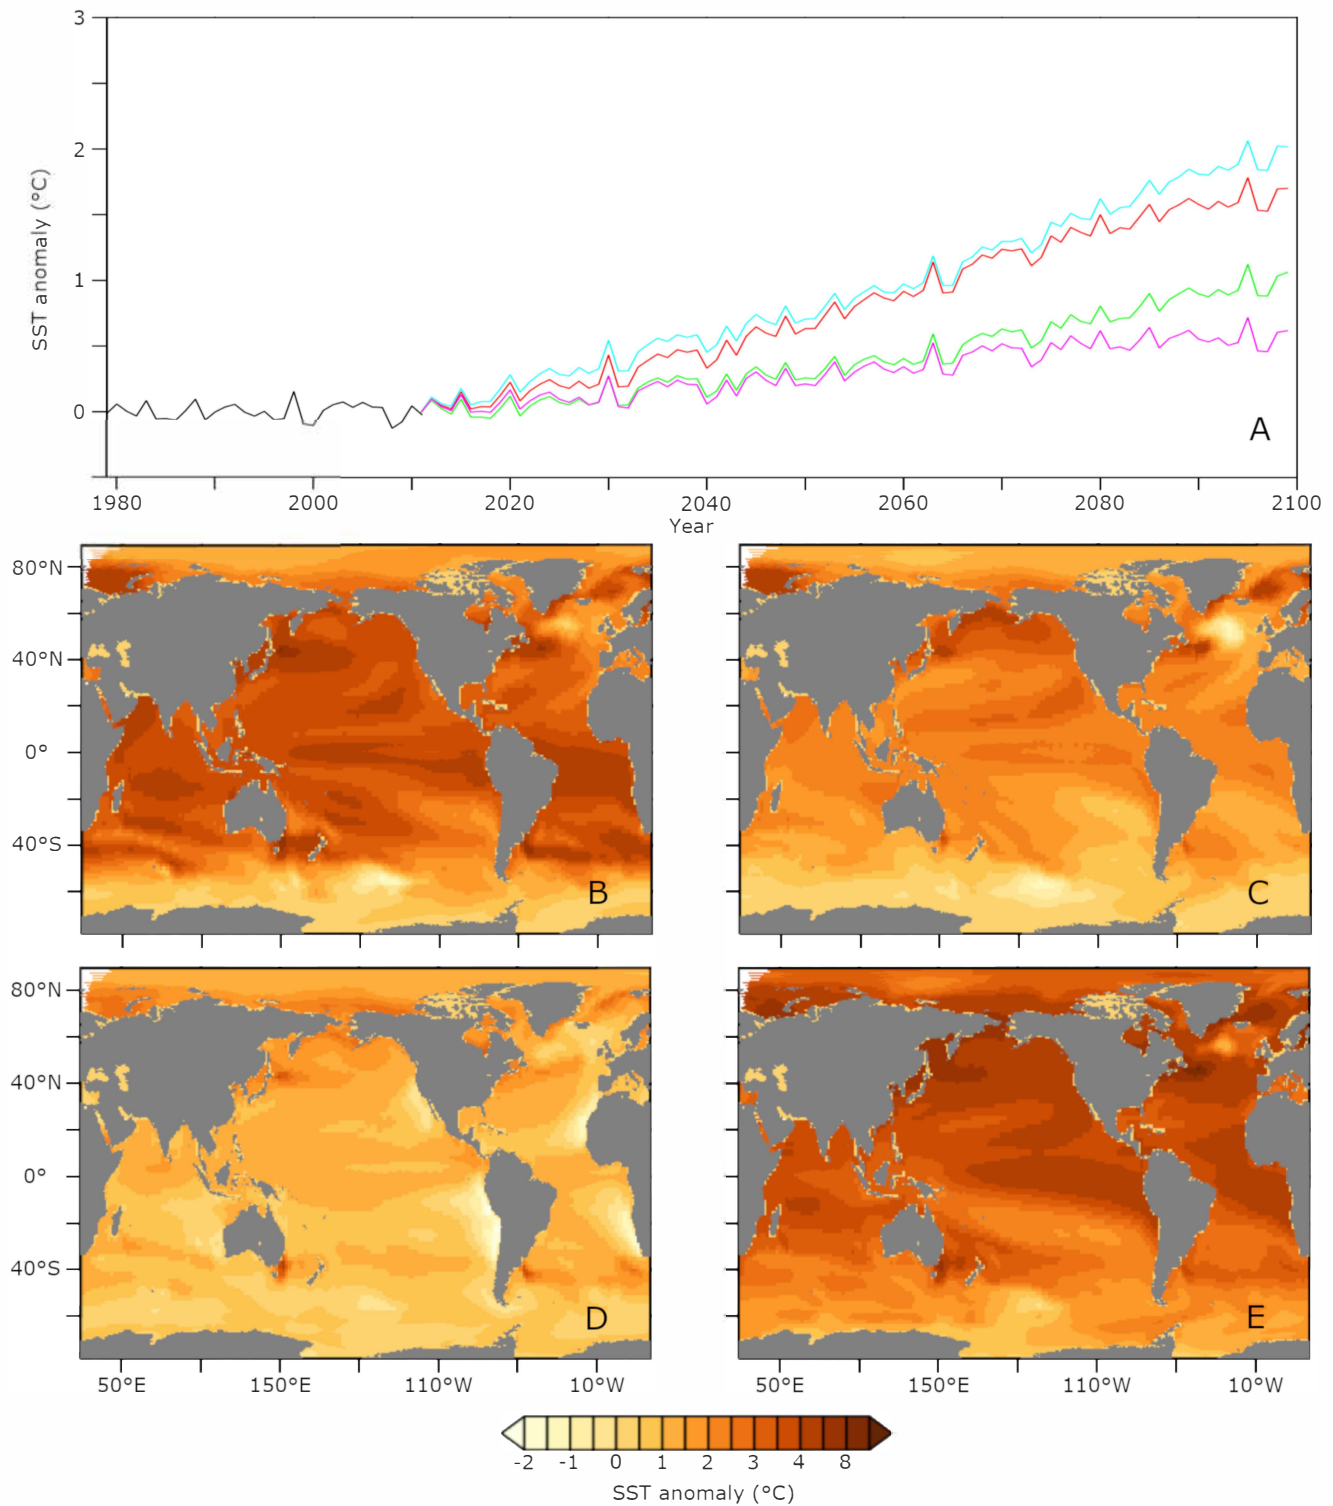

**Supplementary Figure 8.** (A) Time evolution of sea surface temperature (SST) anomalies ( $^{\circ}\text{C}$ ) referenced to the historical period 1979–2010 (black) for the four forced NEMO-PISCES simulations derived from IPSL (red), GFDL (green), MIROC (blue) and MPI (pink). Spatial variation in SST warming during the period 2090–2099, relative to historical mean temperatures (1979–2010), from the NEMO-PISCES simulations derived from ESM forcings from IPSL (B), GFDL (C), MPI (D) and MIROC (E) are also shown.

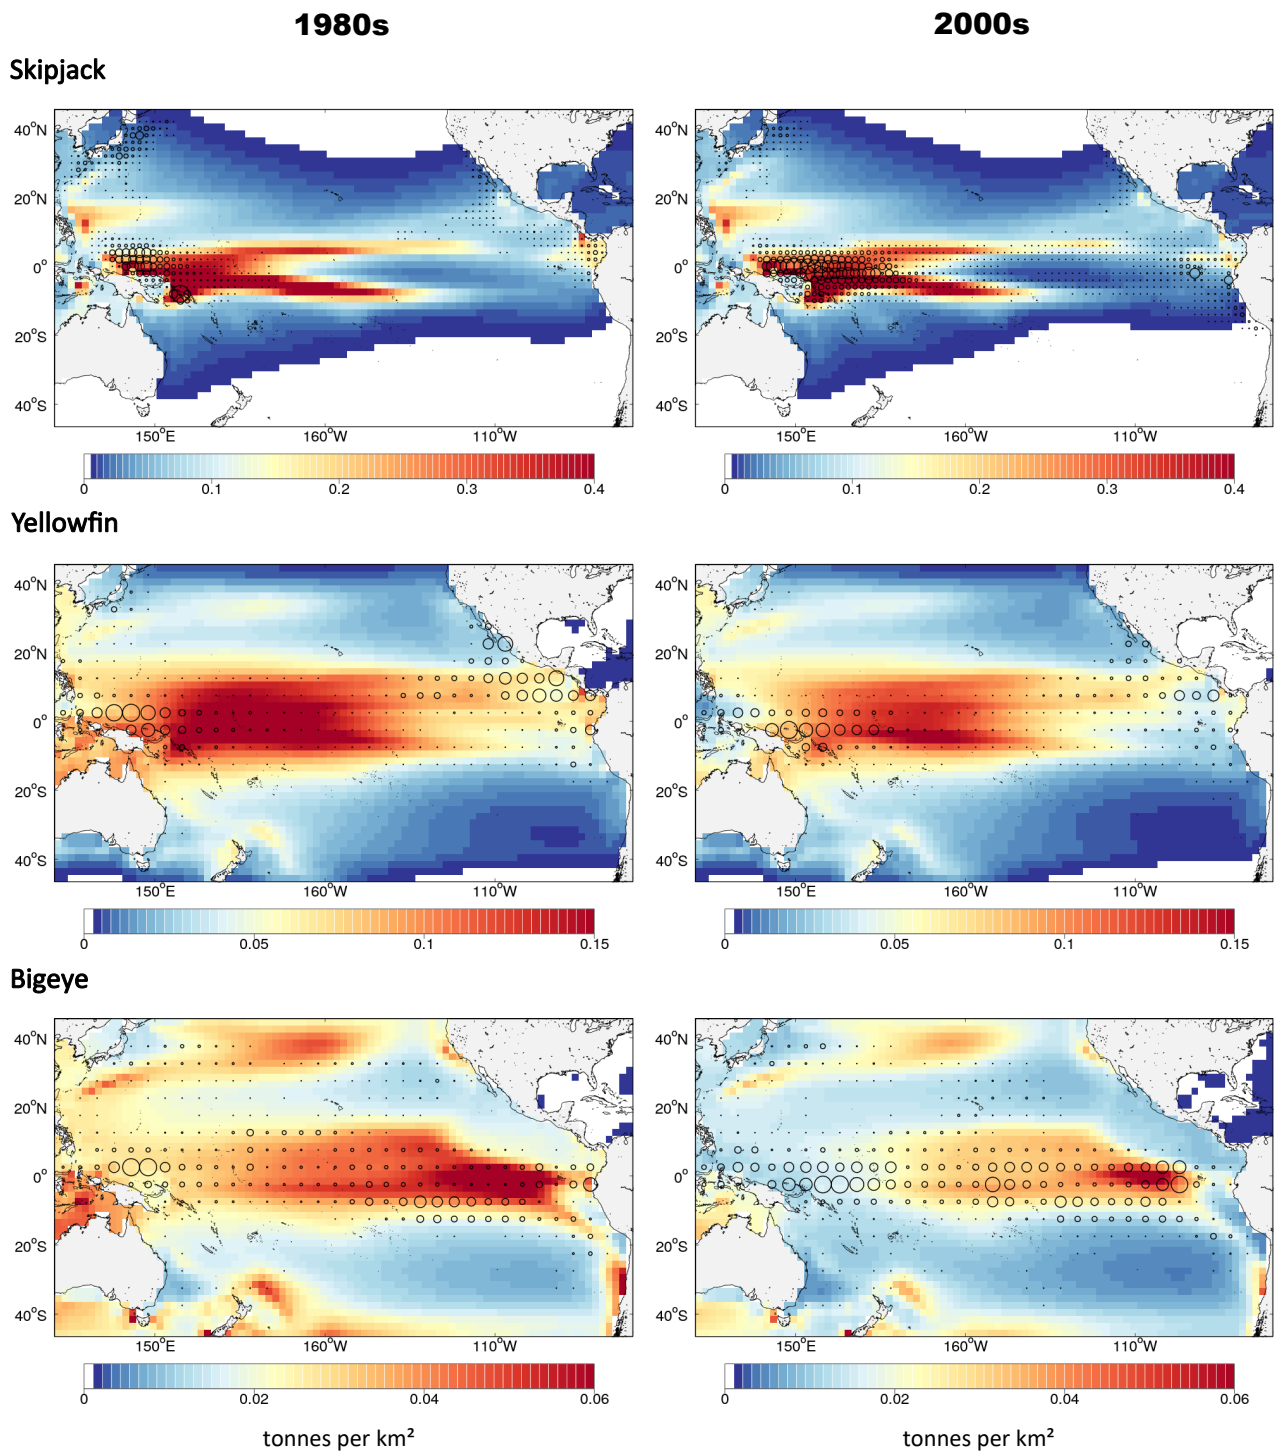

**Supplementary Figure 9.** Comparison of predicted average total biomass distributions (tonnes/km<sup>2</sup>) for the three tropical tuna species produced by SEAPODYM for the first (1980–1989) and last (2000–2009) decades of the historical time series of catch data for these species from the entire Pacific Ocean basin, and the distribution of catches for each species. Circles show the distribution of observed catches, with catch proportional to the size of the circles for each species, but not among species.

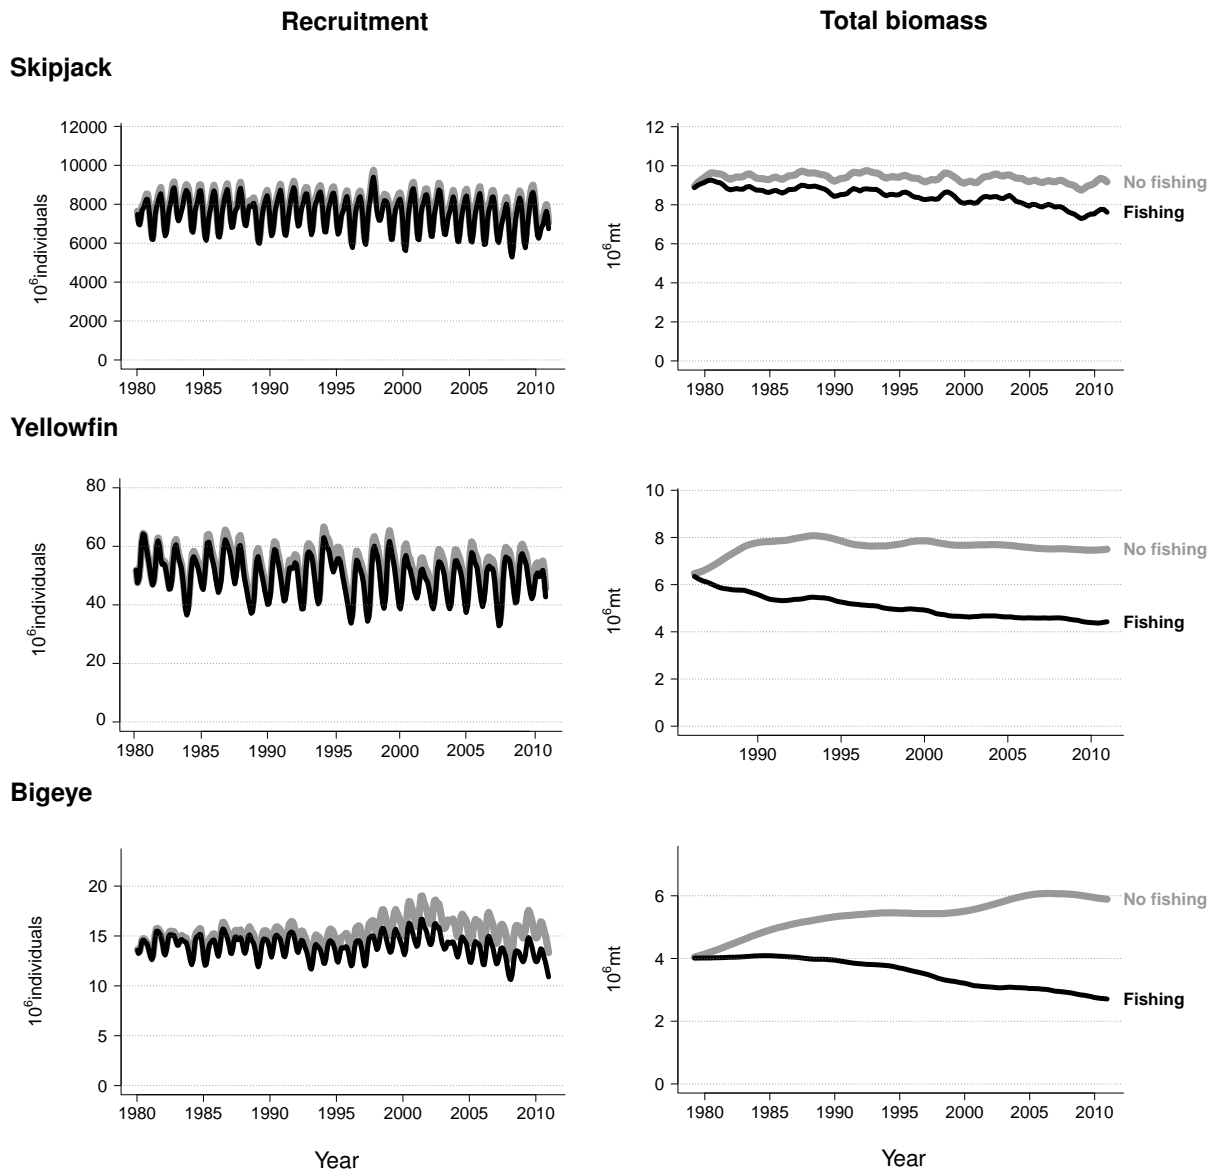

**Supplementary Figure 10.** Predictions from reference models of skipjack, yellowfin and bigeye tuna recruitment (small juveniles, 0–3 months of age) (left), and total biomass computed as the sum of young immature fish and mature adult fish over the Pacific Ocean model domain (right). Curves in all panels represent simulations with observed fishing pressure (black) and with the absence of fishing (grey).

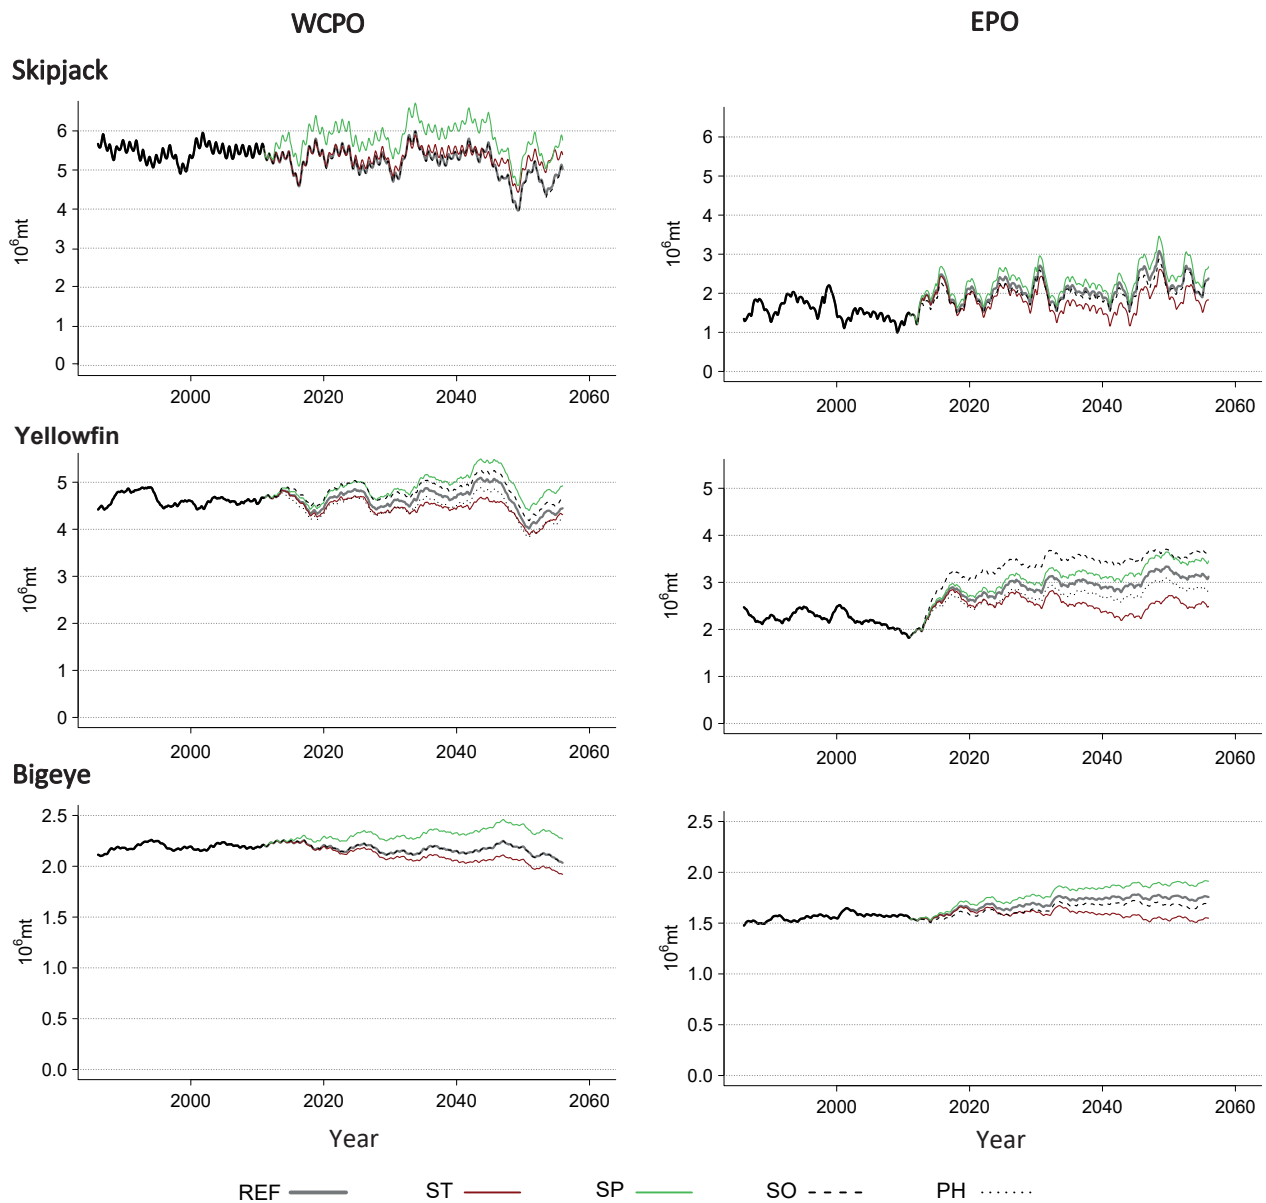

**Supplementary Figure 11.** Total biomass (in metric tonnes,  $\text{mt} \times 10^6$ ) of adult skipjack, yellowfin and bigeye tuna predicted by SEAPODYM in the Western and Central Pacific Ocean (WCPO) ( $120^\circ\text{E}$ – $150^\circ\text{W}$ ;  $45^\circ\text{S}$ – $50^\circ\text{N}$ ) and Eastern Pacific Ocean (EPO) ( $150^\circ\text{W}$ – $70^\circ\text{W}$ ;  $45^\circ\text{S}$ – $50^\circ\text{N}$ ) during the historical time period (1980–2010) and forecast time period (2011–2053) by ‘uncertainty’ scenario (Supplementary Table 21): REF = mean of four climate-derived (IPSL, GFDL, MIROC and MPI) NEMO-PISCES ocean simulations; ST = genetic adaptation to increasing temperature; SP = 10% increase of primary production in tropical region defined by  $27^\circ\text{C}$  isotherm; SO = no change in dissolved oxygen content over forecast period, and PH = negative impact of ocean acidification of larval survival (for yellowfin tuna only). All simulations were run under the RCP8.5 emissions scenario.

**IPCC AR5 simulated greenhouse gas concentrations  
(dashed – CO<sub>2</sub> only) and observed CO<sub>2</sub>**

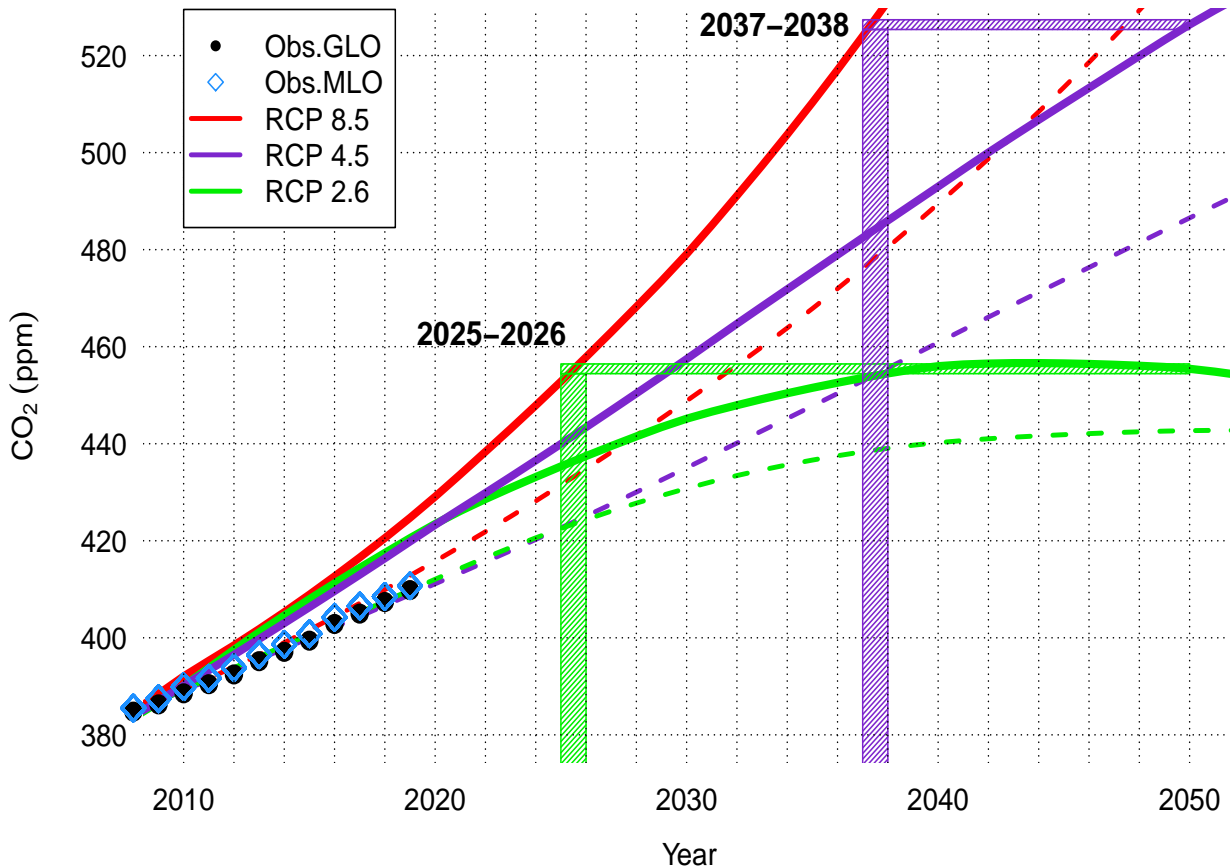

**Supplementary Figure 12.** IPCC (AR5) simulations of total greenhouse gas (GHG) concentrations (CO<sub>2</sub>-eq) (solid lines) and carbon dioxide (CO<sub>2</sub>) (dashed lines) under RCP8.5 (red), RCP4.5 (purple), and RCP2.6 (green) emission scenarios. Black dots represent the observed global mean of atmospheric CO<sub>2</sub> concentrations (Obs.GLO) and blue diamonds show the respective Mauna Loa observations for CO<sub>2</sub> (Obs.MLO). The green shaded areas mark the year when the total GHG concentrations under RCP8.5 equal those under RCP2.6 in 2050; and the purple shaded areas mark the year when the total GHG concentrations under RCP8.5 equal those under RCP4.5 in 2050.

a) Larval skipjack tuna

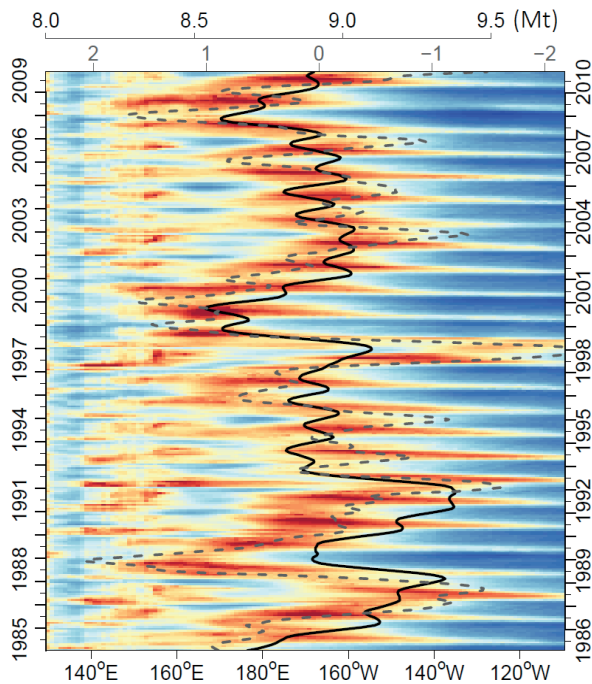

b) Adult skipjack tuna

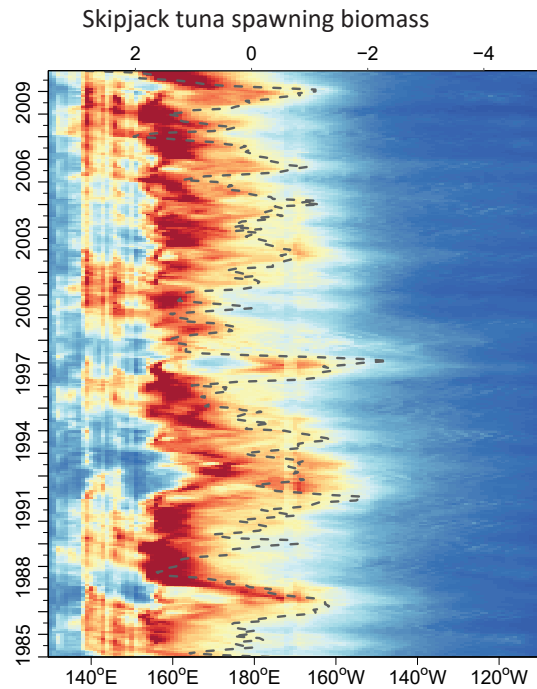

**Supplementary Figure 13.** Hovmöller diagrams showing simulated temporal-spatial variation of (a) larval skipjack tuna density, and (b) adult skipjack tuna density, in the equatorial Pacific (10°S–10°N) between 1985 and 2010. Densities are depicted with colours ranging from blue (near zero values), to dark red (maximum values). Both panels are overlaid with the 3-month moving average of the Southern Oscillation Index (SOI) (grey dashed line), with SOI values depicted on the upper x axis. Panel (a) is also overlaid with the total skipjack biomass (solid line), which has been time-lagged and drawn on the secondary y axis on the right, and quantified in tonnes ( $\times 10^6$ ) on the upper x axis.

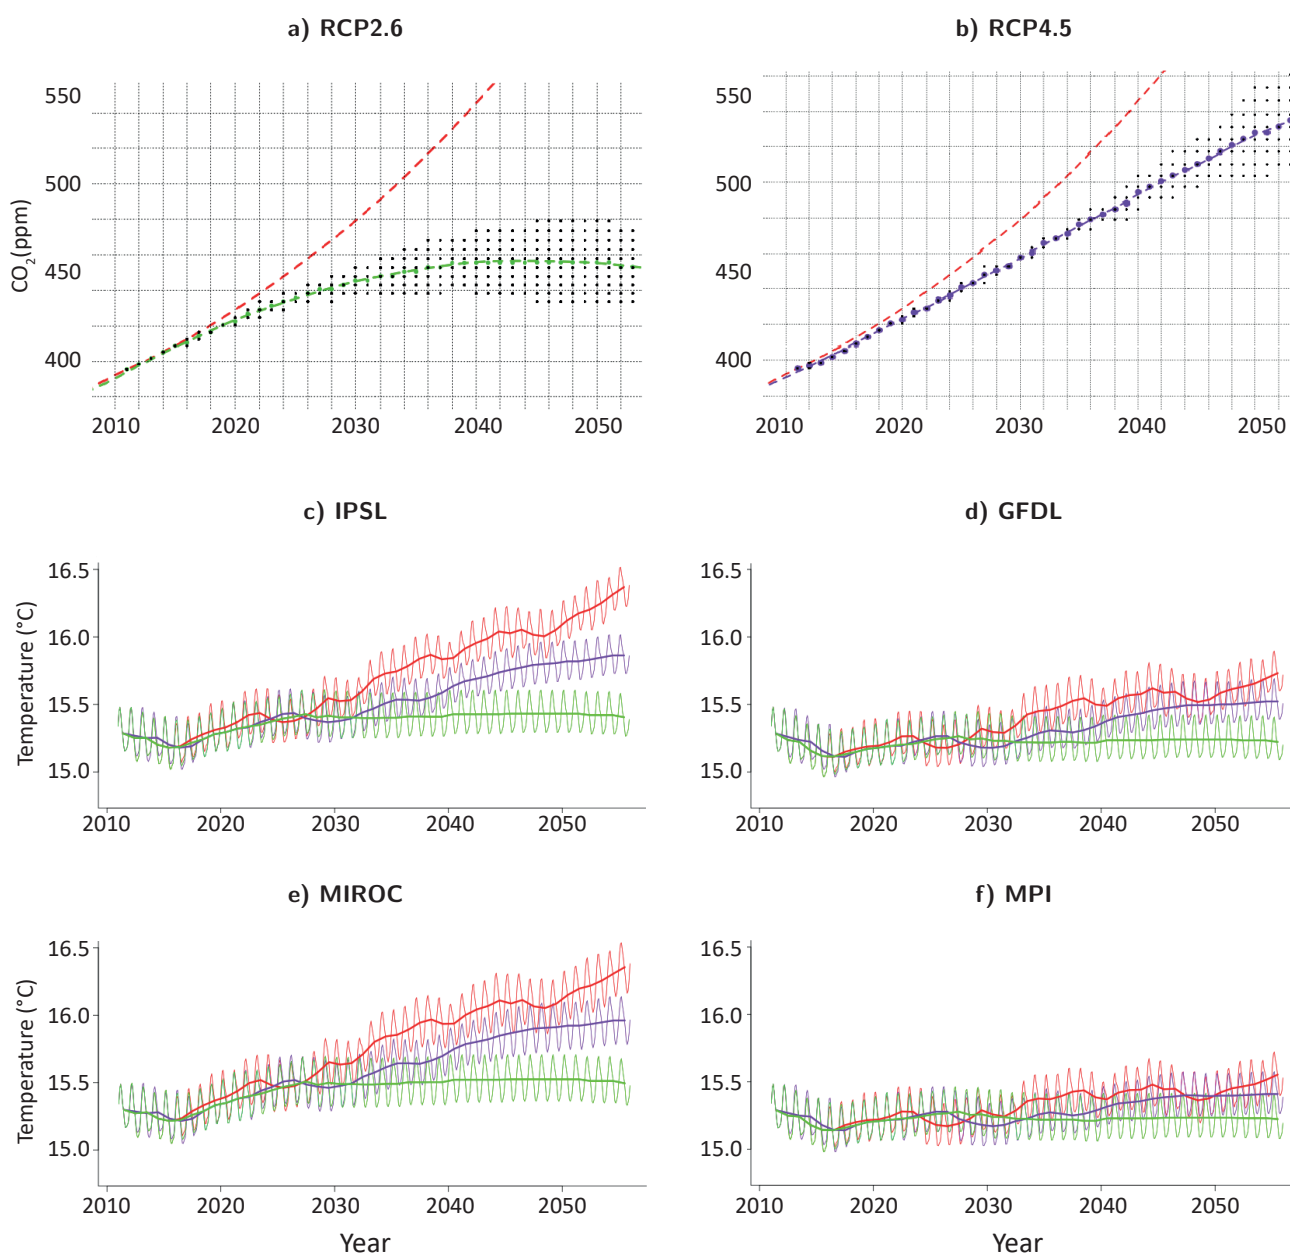

**Supplementary Figure 14.** The mapping of years between (a) RCP2.6 and RCP8.5, and (b) RCP4.5 and RCP8.5, forcings based on equivalent CO<sub>2</sub>-eq concentration to compute smoothed time series for RCP2.6 and RCP4.5 scenarios (see Methods for details); and average ocean temperatures in the epipelagic layer under RCP8.5 forcing (red) and surrogate RCP4.5 (purple) and RCP2.6 (green) forcings in the four climate models (c-f). Thin lines show monthly dynamics and thick lines correspond to the annual average.



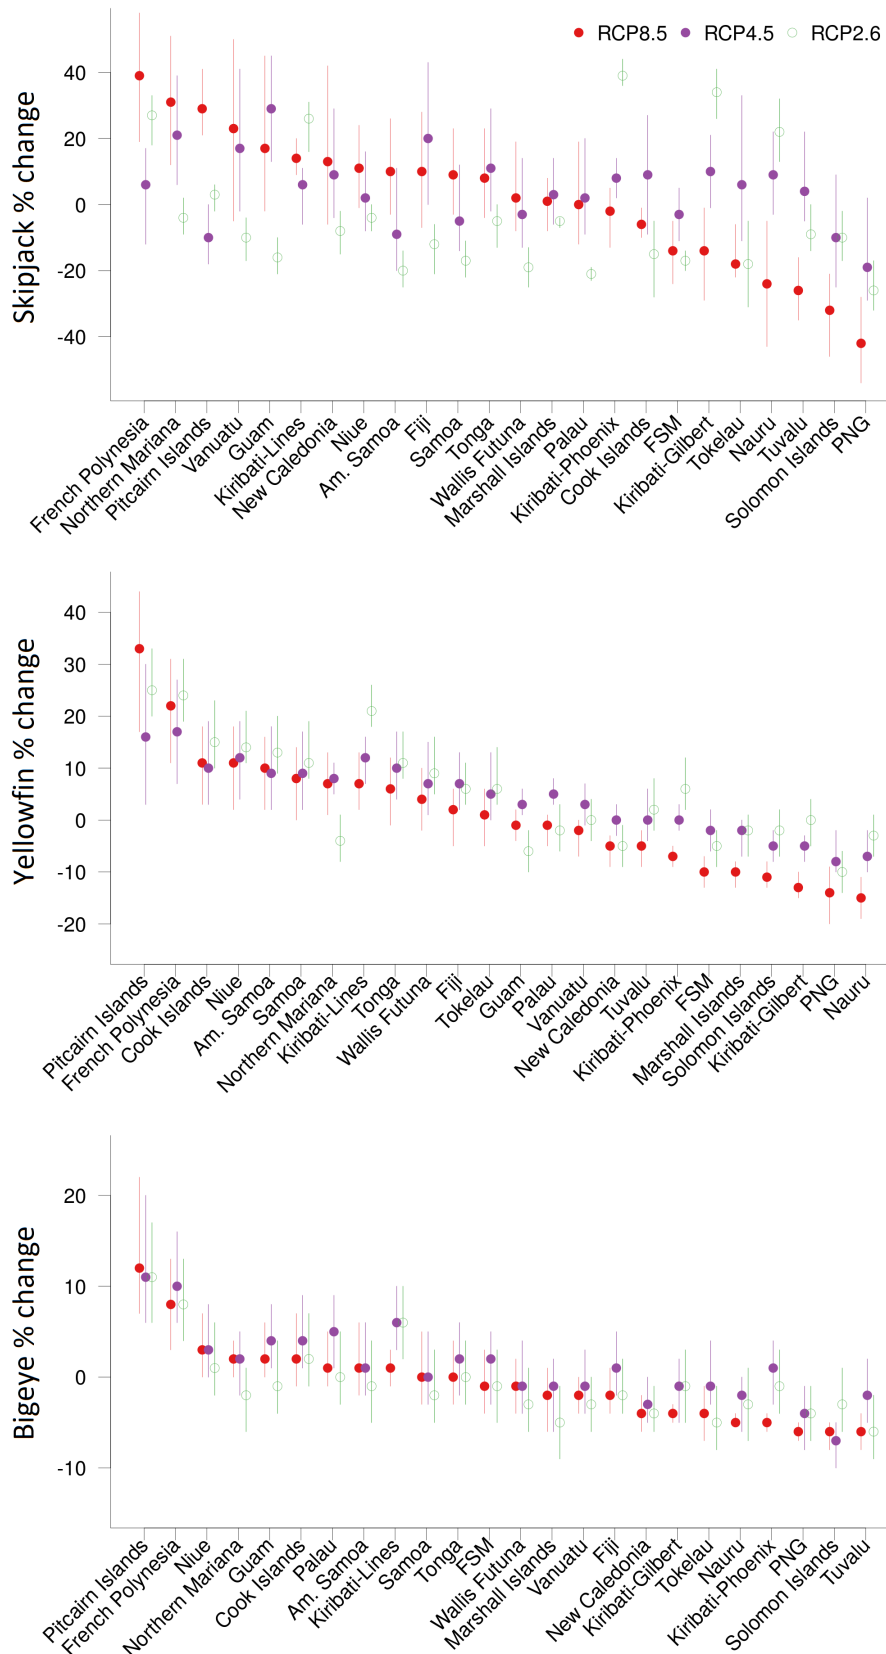

**Supplementary Figure 15.** Percentage change in biomass of skipjack tuna (top), yellowfin tuna (middle) and bigeye tuna (bottom) in the EEZs of Pacific Small Island Developing States in 2050, simulated with ocean forcings under the RCP8.5 emissions scenario (red), and surrogate RCP4.5 (purple) and RCP2.6 (green) scenarios. Circles depict average biomass change projected for each EEZ based on four Earth System Models (ESMs), with the vertical bars showing the range in biomass change from the four ESMs.

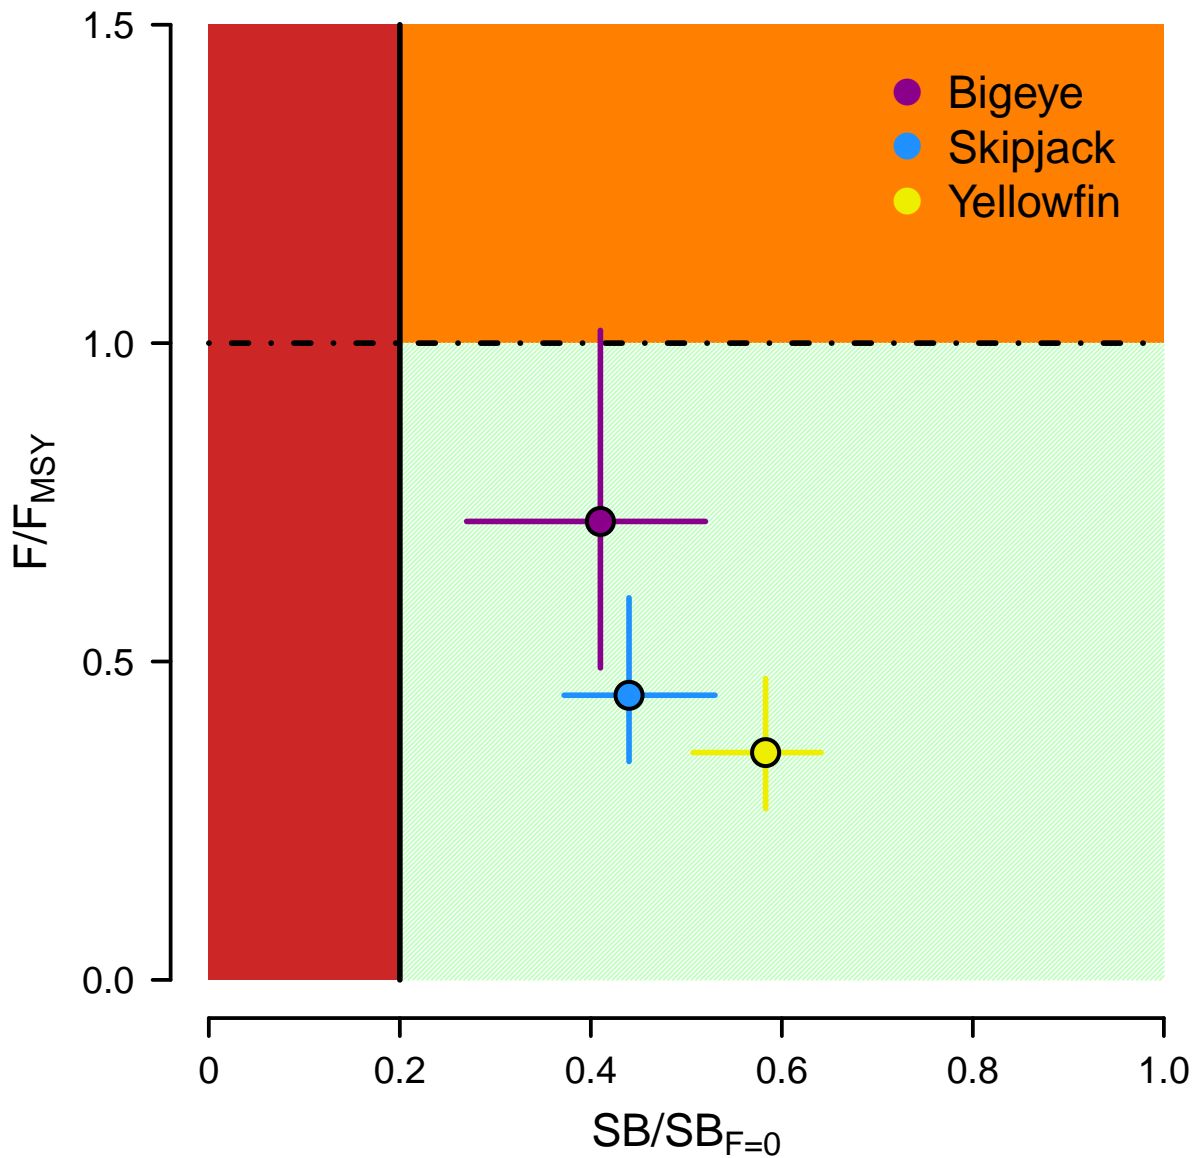

**Supplementary Figure 16.** ‘Majuro’ plot summarizing the stock status for skipjack, yellowfin and bigeye tuna in the Western and Central Pacific Ocean in 2020 in terms of spawning potential depletion relative to unfished levels ( $SB/SB_{F=0}$ ) and fishing mortality ( $F$ ) relative to the level required for maximum sustainable yield  $F_{(MSY)}$ . For each tuna stock, the point represents the median stock status calculated across the grid of assessment runs included by the Scientific Committee of the Western and Central Pacific Fisheries Commission within the ‘structural uncertainty grid’. The ‘cross hairs’ represent the 80 percentile ranges of  $SB/SB_{F=0}$  and  $F/F_{MSY}$  estimates within that grid, as included in management advice (source: Oceanic Fisheries Programme, Pacific Community).

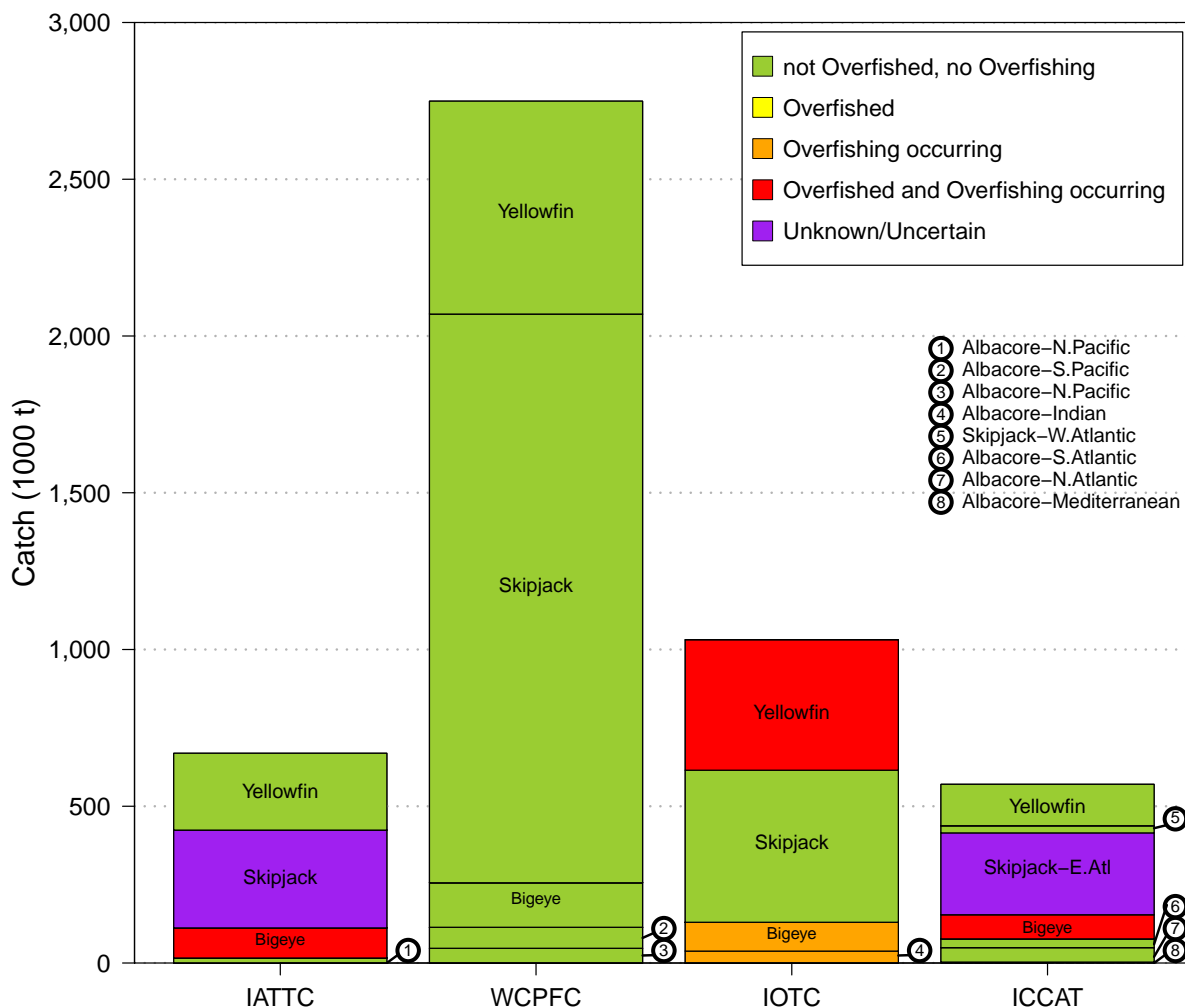

**Supplementary Figure 17.** Catch (5-year average) and stock status of skipjack (SKJ), yellowfin (YFT), bigeye (BET) and albacore (ALB) tuna reported by all tuna regional fisheries management organisations for October 2020. IATTC = Inter-American Tropical Tuna Commission; WCPFC = Western and Central Pacific Fisheries Commission; IOTC = Indian Ocean Tuna Commission; ICCAT = International Commission for the Conservation of Atlantic Tunas (source: Oceanic Fisheries Programme, Pacific Community).

**Supplementary Table 1.** Average total catch (in tonnes) for all tuna species, by all fishing methods, from the combined exclusive economic zones (EEZs) of Pacific Small Island Developing States (Pacific SIDS) between 2009 and 2018. Pacific SIDS have been divided into the eight Parties to the Nauru Agreement (PNA) plus Tokelau (Box 1) and ‘Other Pacific SIDS’. The average total tuna catch from the EEZ of each Pacific SIDS for the 10-year period, and the average percentage (%) of the total regional tuna catch taken from each EEZ, are also shown. For Kiribati, data are presented for the total EEZ for the nation, and for each of three separate EEZ areas comprising the total EEZ (source: Oceanic Fisheries Programme, Pacific Community, May 2020).

| EEZ*                              | Year             |                  |                  |                  |                  |                  |                  |                  |                  |                  | Average total catch | %            |
|-----------------------------------|------------------|------------------|------------------|------------------|------------------|------------------|------------------|------------------|------------------|------------------|---------------------|--------------|
|                                   | 2009             | 2010             | 2011             | 2012             | 2013             | 2014             | 2015             | 2016             | 2017             | 2018             |                     |              |
| <b>PNA Members (plus Tokelau)</b> |                  |                  |                  |                  |                  |                  |                  |                  |                  |                  |                     |              |
| FSM <sup>1</sup>                  | 131,886          | 159,230          | 161,963          | 189,270          | 217,330          | 143,096          | 170,786          | 199,889          | 195,570          | 288,997          | 185,802             | 12.24        |
| Kiribati                          | 328,734          | 204,767          | 214,315          | 556,320          | 296,695          | 735,059          | 642,118          | 413,012          | 384,064          | 401,081          | 417,617             | 27.52        |
| Gilbert Islands                   | (191,807)        | (119,985)        | (144,460)        | (430,840)        | (187,711)        | (438,353)        | (315,385)        | (334,131)        | (264,455)        | (287,947)        | (271,507)           | (17.89)      |
| Phoenix Islands                   | (21,852)         | (22,804)         | (28,078)         | (39,426)         | (32,001)         | (60,318)         | (184,399)        | (32,854)         | (30,290)         | (34,567)         | (48,659)            | (3.21)       |
| Line Islands                      | (115,075)        | (61,978)         | (41,777)         | (86,054)         | (76,982)         | (236,387)        | (142,334)        | (46,028)         | (89,319)         | (78,567)         | (97,450)            | (6.42)       |
| Marshall Islands                  | 16,971           | 26,200           | 25,663           | 32,493           | 46,153           | 87,102           | 38,165           | 89,093           | 33,153           | 36,468           | 43,146              | 2.84         |
| Nauru                             | 61,672           | 109,355          | 103,310          | 50,983           | 163,812          | 179,776          | 67,193           | 115,738          | 82,316           | 174,916          | 110,907             | 7.31         |
| Palau                             | 2,178            | 2,924            | 2,898            | 3,904            | 3,415            | 4,903            | 1,509            | 6,571            | 19,450           | 11,317           | 5,907               | 0.39         |
| PNG <sup>2</sup>                  | 486,102          | 733,397          | 626,478          | 586,094          | 592,134          | 339,386          | 191,135          | 341,527          | 383,992          | 369,451          | 464,970             | 30.64        |
| Solomon Islands                   | 140,375          | 182,422          | 176,773          | 97,695           | 129,322          | 89,724           | 132,107          | 162,812          | 173,652          | 91,898           | 137,678             | 9.07         |
| Tokelau                           | 7,239            | 4,018            | 19,659           | 21,083           | 15,981           | 27,433           | 46,840           | 8,143            | 34,845           | 38,475           | 22,371              | 1.47         |
| Tuvalu                            | 64,506           | 67,948           | 61,130           | 71,276           | 54,820           | 98,289           | 78,426           | 119,969          | 57,808           | 91,825           | 76,600              | 5.05         |
| <b>Sub-total</b>                  | <b>1,239,664</b> | <b>1,490,262</b> | <b>1,392,188</b> | <b>1,609,118</b> | <b>1,519,661</b> | <b>1,704,768</b> | <b>1,368,278</b> | <b>1,456,756</b> | <b>1,364,850</b> | <b>1,504,428</b> | <b>1,464,997</b>    | <b>96.53</b> |

| <b>Other Pacific SIDS</b> |                  |                  |                  |                  |                  |                  |                  |                  |                  |                  |                  |               |
|---------------------------|------------------|------------------|------------------|------------------|------------------|------------------|------------------|------------------|------------------|------------------|------------------|---------------|
| American Samoa            | 3,993            | 3,569            | 3,271            | 5,249            | 2,885            | 4,169            | 3,026            | 3,223            | 3,849            | 3,190            | 3,642            | 0.24          |
| Cook Islands              | 6,492            | 6,559            | 11,048           | 30,754           | 15,971           | 20,473           | 25,053           | 11,732           | 23,515           | 36,083           | 18,768           | 1.24          |
| Fiji                      | 8,370            | 9,895            | 7,333            | 6,845            | 5,475            | 7,423            | 12,175           | 10,733           | 12,159           | 9,127            | 8,953            | 0.59          |
| French Polynesia          | 6,877            | 6,249            | 6,026            | 7,266            | 6,670            | 7,170            | 7,316            | 6,940            | 6,278            | 7,072            | 6,786            | 0.45          |
| Guam                      | 173              | 165              | 196              | 155              | 251              | 192              | 324              | 256              | 262              | 301              | 228              | 0.01          |
| New Caledonia             | 120              | 162              | 120              | 163              | 175              | 117              | 42               | 96               | 27               | 136              | 116              | 0.01          |
| CNMI <sup>3</sup>         | 2,147            | 2,472            | 2,358            | 2,319            | 2,290            | 2,422            | 2,487            | 2,316            | 2,362            | 2,270            | 2,344            | 0.15          |
| Niue                      | 293              | 223              | 0                |                  | 420              | 283              | 282              | 110              | 15               | 426              | 228              | 0.02          |
| Pitcairn Islands          | 0                | 0                | 0                | 0                | 0                | 0                | 0                | 0                | 0                | 0                | 0                | 0.00          |
| Samoa                     | 3,545            | 3,351            | 2,749            | 3,251            | 2,052            | 1,352            | 2,311            | 3,652            | 3,320            | 2,112            | 2,769            | 0.18          |
| Tonga                     | 271              | 128              | 243              | 1,345            | 2,344            | 740              | 1,736            | 2,939            | 1,849            | 1,184            | 1,278            | 0.08          |
| Vanuatu                   | 7,566            | 3,800            | 8,716            | 6,186            | 8,536            | 6,887            | 6,043            | 8,910            | 12,047           | 6,621            | 7,531            | 0.50          |
| Wallis & Futuna           | 132              | 0                | 24               | 0                |                  | 167              | 0                | 0                | 0                |                  | 40               | 0.00          |
| <b>Sub-total</b>          | <b>39,978</b>    | <b>36,571</b>    | <b>42,085</b>    | <b>63,533</b>    | <b>47,070</b>    | <b>51,395</b>    | <b>60,794</b>    | <b>50,905</b>    | <b>65,683</b>    | <b>68,521</b>    | <b>52,654</b>    | <b>3.47</b>   |
| <b>TOTAL</b>              | <b>1,279,642</b> | <b>1,526,833</b> | <b>1,434,273</b> | <b>1,672,651</b> | <b>1,566,731</b> | <b>1,756,163</b> | <b>1,429,072</b> | <b>1,507,661</b> | <b>1,430,533</b> | <b>1,572,949</b> | <b>1,517,651</b> | <b>100.00</b> |

\*Includes area covered by the EEZ and archipelagic waters where they exist

1. Federated States of Micronesia; 2. Papua New Guinea; 3. Commonwealth of Northern Marinas Islands

**Supplementary Table 2.** Average, and standard deviation (SD), tuna-fishing access fees, total national government revenue (excluding grants), and percentage of government revenue derived from tuna-fishing access fees, for the 10 Pacific Small Island Developing States (Pacific SIDS) where most purse-seine fishing occurs in the Western and Central Pacific Ocean, for the 4-year period (2015 to 2018). The area (km<sup>2</sup>) of the exclusive economic zone (EEZ) of each Pacific SIDS is also shown (source: Pacific Islands Forum Fisheries Agency).

| Pacific SIDS | Access fees (USD millions) |            |            |            |              |             | Non-aid government revenue (USD millions) <sup>1</sup> |              |              |              |                |              | Percentage gov't revenue derived from access and licensing fees |      |      |      |      |      | EEZ area (km <sup>2</sup> )* |
|--------------|----------------------------|------------|------------|------------|--------------|-------------|--------------------------------------------------------|--------------|--------------|--------------|----------------|--------------|-----------------------------------------------------------------|------|------|------|------|------|------------------------------|
|              | 2015                       | 2016       | 2017       | 2018       | Mean         | SD          | 2015                                                   | 2016         | 2017         | 2018         | Mean           | SD           | 2015                                                            | 2016 | 2017 | 2018 | Mean | SD   |                              |
| Cook Is      | 8                          | 13         | 18         | 15         | 13.5         | 4.2         | 120                                                    | 122          | 132          | 130          | 126.1          | 6.0          | 6.7                                                             | 10.7 | 13.6 | 11.5 | 10.6 | 2.9  | 1,947,760                    |
| FSM          | 65                         | 63         | 73         | 72         | 68.4         | 5.1         | 117                                                    | 119          | 151          | 215          | 150.6          | 45.9         | 55.7                                                            | 52.9 | 48.2 | 33.6 | 47.6 | 9.8  | 2,939,300                    |
| Kiribati     | 149                        | 107        | 130        | 127        | 128.3        | 17.2        | 191                                                    | 156          | 183          | 197          | 181.7          | 18.2         | 78.2                                                            | 68.7 | 71.0 | 64.5 | 70.6 | 5.7  | 3,550,000 <sup>2</sup>       |
| Marshall Is  | 27                         | 32         | 33         | 32         | 31.0         | 2.7         | 50                                                     | 63           | 80           | 71           | 66.1           | 12.8         | 54.0                                                            | 50.8 | 41.3 | 45.1 | 47.8 | 5.7  | 2,004,888                    |
| Nauru        | 22                         | 28         | 36         | 32         | 29.5         | 6.0         | 58                                                     | 94           | 112          | 130          | 98.6           | 30.5         | 37.6                                                            | 29.9 | 32.1 | 24.7 | 31.1 | 5.4  | 293,079                      |
| Palau        | 6                          | 5          | 9          | 8          | 7.1          | 1.9         | 71                                                     | 75           | 78           | 77           | 75.2           | 3.0          | 8.5                                                             | 6.7  | 11.6 | 11.0 | 9.4  | 2.3  | 605,506                      |
| PNG          | 118                        | 149        | 111        | 159        | 134.3        | 23.3        | 3669                                                   | 2891         | 3163         | 3720         | 3360.8         | 401.7        | 3.2                                                             | 5.2  | 3.5  | 4.3  | 4.0  | 0.9  | 2,446,757                    |
| Solomon Is   | 40                         | 34         | 45         | 47         | 41.3         | 6.1         | 403                                                    | 388          | 445          | 480          | 429.0          | 41.7         | 9.8                                                             | 8.7  | 10.1 | 9.8  | 9.6  | 0.6  | 1,553,444                    |
| Tokelau      | 11                         | 16         | 13         | 14         | 13.4         | 2.1         | 12                                                     | 18           | 18           | 16           | 16.0           | 2.9          | 91.7                                                            | 87.9 | 72.4 | 84.6 | 84.2 | 8.4  | 318,990                      |
| Tuvalu       | 18                         | 25         | 21         | 38         | 25.6         | 9.0         | 40                                                     | 53           | 49           | 48           | 47.4           | 5.4          | 45.1                                                            | 47.2 | 43.1 | 80.2 | 53.9 | 17.6 | 719,174                      |
| <b>Total</b> | <b>464</b>                 | <b>472</b> | <b>489</b> | <b>546</b> | <b>492.4</b> | <b>37.0</b> | <b>4,731</b>                                           | <b>3,979</b> | <b>4,411</b> | <b>5,082</b> | <b>4,550.6</b> | <b>469.4</b> |                                                                 |      |      |      |      |      | <b>16,378,898</b>            |

**Supplementary Table 3.** Average (mean  $\pm$  standard deviation) annual catch (tonnes) of skipjack (SKJ), yellowfin (YFT) and bigeye (BET) tuna, and all three species of tuna combined, taken by purse-seine fishing over the 10-year period (2009–2018) in the exclusive economic zones (EEZs) of 10 Pacific Island Small Developing States; note that Kiribati has three EEZ areas (source: Oceanic Fisheries Programme, Pacific Community, May 2020).

| Tuna species | Year | Pacific Island Small Developing State EEZ* |                  |                    |                |               |               |                  |               |               |                  |                 |               |               | Total         |                  |
|--------------|------|--------------------------------------------|------------------|--------------------|----------------|---------------|---------------|------------------|---------------|---------------|------------------|-----------------|---------------|---------------|---------------|------------------|
|              |      | Cook Islands                               | FSM <sup>1</sup> | Kiribati EEZ areas |                |               |               | RMI <sup>2</sup> | Nauru         | Palau         | PNG <sup>3</sup> | Solomon Islands | Tokelau       | Tuvalu        |               |                  |
|              |      |                                            |                  | Gilbert            | Phoenix        | Line          | Total         |                  |               |               |                  |                 |               |               |               |                  |
| SKJ          | 2009 | 660                                        | 103,279          | 149,552            | 99,067         | 10,071        | 258,690       | 10,434           | 49,956        | 678           | 335,605          | 88,495          | 5,913         | 56,593        | 910,304       |                  |
|              | 2010 | 209                                        | 128,633          | 76,191             | 49,700         | 11,022        | 136,913       | 13,682           | 81,891        | 273           | 518,133          | 131,870         | 3,459         | 56,766        | 1,071,829     |                  |
|              | 2011 | 1,355                                      | 116,283          | 98,084             | 26,063         | 13,730        | 137,877       | 17,482           | 80,197        | 0             | 461,595          | 124,243         | 17,593        | 45,701        | 1,002,326     |                  |
|              | 2012 | 11,031                                     | 154,285          | 299,420            | 69,028         | 21,010        | 389,458       | 18,583           | 39,147        | 507           | 425,565          | 56,913          | 17,517        | 57,596        | 1,170,601     |                  |
|              | 2013 | 6,209                                      | 184,767          | 143,931            | 62,712         | 14,628        | 221,271       | 33,378           | 129,015       | 301           | 426,845          | 80,825          | 13,703        | 45,250        | 1,141,564     |                  |
|              | 2014 | 11,484                                     | 111,683          | 359,575            | 189,474        | 33,673        | 582,722       | 65,796           | 148,165       | 902           | 223,145          | 36,034          | 24,138        | 85,491        | 1,289,559     |                  |
|              | 2015 | 16,050                                     | 105,107          | 242,671            | 126,676        | 151,641       | 520,988       | 23,368           | 50,134        | 183           | 107,868          | 75,110          | 42,478        | 69,977        | 1,011,261     |                  |
|              | 2016 | 5,917                                      | 158,084          | 254,856            | 39,320         | 18,780        | 312,956       | 70,918           | 80,135        | 2,199         | 207,202          | 91,968          | 4,159         | 98,751        | 1,032,289     |                  |
|              | 2017 | 15,026                                     | 148,957          | 178,585            | 73,215         | 21,459        | 273,259       | 21,359           | 56,606        | 8,261         | 236,994          | 113,417         | 28,662        | 44,742        | 947,282       |                  |
|              | 2018 | 27,187                                     | 231,641          | 232,617            | 64,500         | 24,872        | 321,989       | 24,895           | 146,497       | 3,503         | 239,337          | 47,498          | 32,749        | 77,764        | 1,153,060     |                  |
|              |      | <b>Mean</b>                                | <b>9,513</b>     | <b>144,272</b>     | <b>203,548</b> | <b>79,976</b> | <b>32,089</b> | <b>315,612</b>   | <b>29,990</b> | <b>86,174</b> | <b>1,681</b>     | <b>318,229</b>  | <b>84,637</b> | <b>19,037</b> | <b>63,863</b> | <b>1,073,008</b> |
|              |      | <b>SD</b>                                  | <b>8,479</b>     | <b>40,676</b>      | <b>90,049</b>  | <b>47,975</b> | <b>42,597</b> | <b>180,621</b>   | <b>21,208</b> | <b>40,966</b> | <b>2,557</b>     | <b>134,404</b>  | <b>32,166</b> | <b>13,018</b> | <b>18,559</b> | <b>115,602</b>   |
| YFT          | 2009 | 80                                         | 19,034           | 18,866             | 6,931          | 1,917         | 27,714        | 2,032            | 9,872         | 272           | 131,693          | 27,684          | 971           | 5,345         | 224,697       |                  |
|              | 2010 | 45                                         | 19,291           | 25,531             | 6,857          | 2,575         | 34,963        | 3,232            | 23,977        | 63            | 191,250          | 25,550          | 423           | 6,647         | 305,442       |                  |
|              | 2011 | 48                                         | 32,564           | 18,591             | 9,508          | 3,249         | 31,348        | 2,546            | 14,453        | 0             | 146,453          | 31,623          | 913           | 7,461         | 267,407       |                  |
|              | 2012 | 1,368                                      | 22,466           | 101,556            | 10,851         | 5,500         | 117,907       | 3,164            | 8,257         | 220           | 140,960          | 18,094          | 1,878         | 6,763         | 321,078       |                  |
|              | 2013 | 1,428                                      | 22,468           | 27,742             | 7,702          | 4,573         | 40,017        | 4,899            | 26,393        | 7             | 146,802          | 26,440          | 1,351         | 5,326         | 275,131       |                  |
|              | 2014 | 1,060                                      | 19,461           | 55,009             | 31,827         | 12,776        | 99,612        | 9,731            | 23,555        | 1,801         | 104,346          | 20,366          | 2,074         | 7,517         | 289,523       |                  |
|              | 2015 | 1,293                                      | 50,323           | 47,592             | 11,482         | 15,810        | 74,884        | 7,598            | 14,532        | 2             | 72,242           | 23,156          | 1,289         | 5,119         | 250,438       |                  |
|              | 2016 | 939                                        | 27,827           | 56,298             | 3,169          | 1,966         | 61,433        | 11,261           | 31,958        | 1,557         | 118,169          | 55,774          | 665           | 10,725        | 320,307       |                  |
|              | 2017 | 2,799                                      | 36,853           | 69,162             | 12,546         | 3,749         | 85,457        | 4,899            | 22,126        | 4,249         | 132,006          | 41,930          | 3,462         | 7,114         | 340,896       |                  |
|              | 2018 | 2,014                                      | 42,886           | 39,462             | 9,635          | 4,559         | 53,656        | 4,986            | 24,395        | 1,245         | 116,568          | 21,166          | 3,588         | 7,424         | 277,928       |                  |
|              |      | <b>Mean</b>                                | <b>1,107</b>     | <b>29,317</b>      | <b>45,981</b>  | <b>11,051</b> | <b>5,667</b>  | <b>62,699</b>    | <b>5,435</b>  | <b>19,952</b> | <b>942</b>       | <b>130,049</b>  | <b>29,178</b> | <b>1,661</b>  | <b>6,944</b>  | <b>287,285</b>   |
|              |      | <b>SD</b>                                  | <b>896</b>       | <b>11,016</b>      | <b>26,024</b>  | <b>7,792</b>  | <b>4,746</b>  | <b>38,562</b>    | <b>3,123</b>  | <b>7,726</b>  | <b>1,355</b>     | <b>31,174</b>   | <b>11,546</b> | <b>1,104</b>  | <b>1,625</b>  | <b>35,507</b>    |

|                         |             |               |                |                |               |               |                |               |                |              |                |                |               |               |                  |
|-------------------------|-------------|---------------|----------------|----------------|---------------|---------------|----------------|---------------|----------------|--------------|----------------|----------------|---------------|---------------|------------------|
| <b>BET</b>              | 2009        | 35            | 3,250          | 6,792          | 3,780         | 2,226         | 12,798         | 697           | 1,835          | 0            | 14,761         | 2,269          | 343           | 1,380         | 37,368           |
|                         | 2010        | 10            | 5,278          | 2,671          | 3,216         | 2,401         | 8,288          | 596           | 3,397          | 11           | 20,917         | 5,658          | 132           | 1,651         | 45,938           |
|                         | 2011        | 5             | 4,248          | 12,716         | 4,134         | 3,485         | 20,335         | 1,666         | 8,486          | 0            | 15,496         | 4,784          | 658           | 3,436         | 59,112           |
|                         | 2012        | 458           | 5,323          | 15,423         | 3,244         | 3,251         | 21,918         | 1,956         | 3,354          | 11           | 15,263         | 2,239          | 686           | 1,518         | 52,726           |
|                         | 2013        | 727           | 4,865          | 8,868          | 4,796         | 4,724         | 18,388         | 1,585         | 8,222          | 2            | 17,137         | 3,399          | 749           | 1,683         | 56,758           |
|                         | 2014        | 815           | 3,588          | 13,969         | 5,840         | 3,802         | 23,611         | 2,856         | 7,760          | 1            | 9,917          | 1,494          | 981           | 2,874         | 53,896           |
|                         | 2015        | 320           | 5,214          | 10,345         | 2,685         | 4,455         | 17,485         | 691           | 2,441          | 1            | 8,897          | 1,908          | 368           | 1,687         | 39,011           |
|                         | 2016        | 393           | 6,562          | 12,567         | 1,515         | 1,680         | 15,762         | 3,112         | 3,609          | 53           | 10,058         | 3,377          | 186           | 4,066         | 47,178           |
|                         | 2017        | 1,055         | 5,355          | 11,117         | 3,343         | 4,083         | 18,543         | 1,621         | 3,563          | 188          | 8,396          | 3,379          | 1,422         | 1,472         | 44,994           |
|                         | 2018        | 781           | 6,295          | 10,975         | 4,145         | 5,122         | 20,242         | 1,006         | 4,006          | 63           | 6,698          | 2,104          | 1,410         | 2,966         | 45,570           |
|                         | <b>Mean</b> | <b>460</b>    | <b>4,998</b>   | <b>10,544</b>  | <b>3,670</b>  | <b>3,523</b>  | <b>17,737</b>  | <b>1,578</b>  | <b>4,667</b>   | <b>33</b>    | <b>12,754</b>  | <b>3,061</b>   | <b>693</b>    | <b>2,273</b>  | <b>48,255</b>    |
|                         | <b>SD</b>   | <b>375</b>    | <b>1,060</b>   | <b>3,708</b>   | <b>1,180</b>  | <b>1,139</b>  | <b>6,028</b>   | <b>881</b>    | <b>2,492</b>   | <b>59</b>    | <b>4,589</b>   | <b>1,334</b>   | <b>463</b>    | <b>972</b>    | <b>16,745</b>    |
| <b>All tuna species</b> | 2009        | 775           | 125,563        | 175,210        | 109,778       | 14,214        | 299,202        | 13,163        | 61,664         | 950          | 482,059        | 118,449        | 7,227         | 63,318        | 1,172,369        |
|                         | 2010        | 264           | 153,203        | 104,393        | 59,773        | 15,998        | 180,164        | 7,511         | 109,265        | 347          | 730,300        | 163,078        | 4,014         | 65,064        | 1,423,209        |
|                         | 2011        | 1,407         | 153,094        | 129,391        | 39,705        | 20,464        | 189,560        | 21,693        | 103,136        | 0            | 623,544        | 160,649        | 19,164        | 56,599        | 1,328,845        |
|                         | 2012        | 12,858        | 182,074        | 416,399        | 83,123        | 29,761        | 529,283        | 23,703        | 50,758         | 738          | 581,788        | 77,246         | 20,081        | 65,877        | 1,544,406        |
|                         | 2013        | 8,364         | 212,100        | 180,541        | 75,210        | 23,925        | 279,676        | 39,862        | 163,631        | 310          | 590,784        | 110,663        | 15,802        | 52,259        | 1,473,453        |
|                         | 2014        | 13,358        | 134,732        | 428,553        | 227,141       | 50,251        | 705,945        | 78,383        | 179,480        | 2,704        | 337,408        | 57,894         | 27,194        | 95,882        | 1,632,979        |
|                         | 2015        | 17,662        | 160,645        | 300,608        | 140,843       | 171,906       | 613,357        | 31,657        | 67,107         | 185          | 189,007        | 100,174        | 44,134        | 76,783        | 1,300,711        |
|                         | 2016        | 7,249         | 192,474        | 323,721        | 44,004        | 22,426        | 390,151        | 85,291        | 115,702        | 3,809        | 335,429        | 151,118        | 5,010         | 113,541       | 1,399,774        |
|                         | 2017        | 18,879        | 191,165        | 258,864        | 89,104        | 29,291        | 377,259        | 27,880        | 82,295         | 12,698       | 377,397        | 158,726        | 33,546        | 53,328        | 1,333,173        |
|                         | 2018        | 29,981        | 280,822        | 283,054        | 78,280        | 34,553        | 395,887        | ,886          | 174,898        | 4,812        | 362,603        | 70,768         | 37,747        | 88,154        | 1,476,559        |
|                         | <b>Mean</b> | <b>11,080</b> | <b>178,587</b> | <b>260,073</b> | <b>94,696</b> | <b>41,279</b> | <b>396,048</b> | <b>37,003</b> | <b>110,794</b> | <b>2,655</b> | <b>461,032</b> | <b>116,877</b> | <b>21,392</b> | <b>73,080</b> | <b>1,408,548</b> |
|                         | <b>SD</b>   | <b>9,478</b>  | <b>45,079</b>  | <b>112,491</b> | <b>55,304</b> | <b>47,054</b> | <b>214,849</b> | <b>24,858</b> | <b>47,659</b>  | <b>3,907</b> | <b>167,503</b> | <b>40,097</b>  | <b>14,044</b> | <b>20,289</b> | <b>132,245</b>   |

\*Includes area covered by the EEZ and archipelagic waters where they exist; 1. Federated States of Micronesia; 2. Republic of Marshall Islands; 3. Papua New Guinea



**Supplementary Table 4.** Annual average (mean  $\pm$  standard deviation) catch (tonnes) of skipjack (SKJ), yellowfin (YFT) and bigeye (BET) tuna, and all three species of tuna combined, taken by purse-seine fishing over the 10-year period (2009–2018) from high-seas areas in the Western and Central Pacific Ocean, and Eastern Pacific Ocean (Supplementary Figure 1) (source: Oceanic Fisheries Programme, Pacific Community, May 2020).

| Tuna species | Year      | High-seas areas |               |               |               |               |               |               |           |           |               |               |               |               |                | Total         |
|--------------|-----------|-----------------|---------------|---------------|---------------|---------------|---------------|---------------|-----------|-----------|---------------|---------------|---------------|---------------|----------------|---------------|
|              |           | I1              | I2            | I3            | I4            | I5            | I6            | I7            | I8        | I9        | H4            | H5            | EPO-N         | EPO-C         | EPO-S          |               |
| SKJ          | 2009      | 17,543          | 164,867       | 0             | 17,300        | 14,954        | 16,799        | 0             | 0         | 0         | 36,743        | 18,385        | 2,457         | 237,466       | 1,548          | 528,062       |
|              | 2010      | 578             | 1,881         | 0             | 4,013         | 8,845         | 28,771        | 0             | 0         | 0         | 9,828         | 10,970        | 3,252         | 169,348       | 795            | 238,281       |
|              | 2011      | 0               | 1,088         | 170           | 13,472        | 8,063         | 15,993        | 0             | 0         | 0         | 4,620         | 7,441         | 7,929         | 266,548       | 793            | 326,117       |
|              | 2012      | 130             | 530           | 20            | 8,517         | 7,936         | 21,006        | 71            | 0         | 94        | 8,196         | 25,874        | 9,045         | 263,449       | 341            | 345,209       |
|              | 2013      | 9,453           | 11,399        | 0             | 9,195         | 11,803        | 15,802        | 0             | 15        | 122       | 5,537         | 12,516        | 9,621         | 259,034       | 155            | 344,652       |
|              | 2014      | 19,370          | 1,214         | 205           | 7,917         | 13,104        | 28,006        | 0             | 0         | 24        | 18,581        | 44,258        | 5,389         | 246,195       | 1,691          | 385,954       |
|              | 2015      | 15,897          | 1,147         | 40            | 17,049        | 33,499        | 14,107        | 57            | 0         | 0         | 18,270        | 156,393       | 7,403         | 294,847       | 94             | 558,803       |
|              | 2016      | 14,189          | 1,350         | 6             | 51,532        | 37,033        | 1,928         | 0             | 0         | 0         | 35,938        | 13,386        | 5,089         | 272,644       | 3,364          | 436,459       |
|              | 2017      | 15,750          | 774           | 10            | 18,810        | 7,414         | 9,192         | 0             | 0         | 0         | 30,758        | 29,307        | 12,478        | 279,057       | 6,547          | 410,096       |
|              | 2018      | 12,370          | 2,046         | 0             | 17,352        | 27,288        | 2,988         | 0             | 0         | 0         | 15,839        | 72,965        | 8,057         | 257,433       | 4,985          | 421,323       |
|              |           | <b>Mean</b>     | <b>10,528</b> | <b>18,630</b> | <b>45</b>     | <b>16,516</b> | <b>16,994</b> | <b>15,459</b> | <b>13</b> | <b>2</b>  | <b>24</b>     | <b>18,431</b> | <b>39,150</b> | <b>7,072</b>  | <b>254,602</b> | <b>2,031</b>  |
|              | <b>SD</b> | <b>7,597</b>    | <b>51,483</b> | <b>77</b>     | <b>13,292</b> | <b>11,285</b> | <b>9,112</b>  | <b>27</b>     | <b>5</b>  | <b>45</b> | <b>12,185</b> | <b>45,695</b> | <b>3,056</b>  | <b>34,033</b> | <b>2,222</b>   | <b>95,088</b> |
| YFT          | 2009      | 2,333           | 32,140        | 5             | 4,244         | 4,803         | 70            | 0             | 0         | 0         | 1,700         | 1,436         | 76,470        | 165,564       | 1,390          | 290,155       |
|              | 2010      | 28              | 436           | 0             | 1,023         | 2,015         | 374           | 0             | 0         | 0         | 1,122         | 1,515         | 98,047        | 129,480       | 1,438          | 235,478       |
|              | 2011      | 0               | 196           | 3             | 2,002         | 1,507         | 2,405         | 0             | 0         | 0         | 1,092         | 3,031         | 74,508        | 133,305       | 319            | 218,369       |
|              | 2012      | 11              | 100           | 0             | 3,112         | 2,078         | 290           | 20            | 0         | 23        | 1,204         | 4,374         | 63,172        | 140,474       | 22             | 214,880       |
|              | 2013      | 2,799           | 2,476         | 0             | 2,770         | 3,172         | 225           | 0             | 5         | 38        | 444           | 1,926         | 93,516        | 126,251       | 33             | 233,655       |
|              | 2014      | 5,543           | 171           | 5             | 1,336         | 3,816         | 317           | 0             | 0         | 1         | 2,316         | 13,908        | 93,446        | 146,000       | 409            | 267,268       |
|              | 2015      | 7,667           | 267           | 0             | 3,132         | 6,349         | 685           | 7             | 0         | 0         | 1,300         | 9,971         | 69,398        | 176,302       | 72             | 275,150       |
|              | 2016      | 7,916           | 229           | 1             | 4,721         | 2,092         | 95            | 0             | 0         | 0         | 2,293         | 1,063         | 79,284        | 153,549       | 342            | 251,585       |
|              | 2017      | 8,094           | 141           | 0             | 7,685         | 1,462         | 499           | 0             | 0         | 0         | 6,107         | 4,134         | 61,627        | 140,750       | 372            | 230,871       |
|              | 2018      | 7,757           | 309           | 0             | 1,965         | 8,005         | 107           | 0             | 0         | 0         | 1,783         | 14,063        | 61,450        | 165,753       | 998            | 262,190       |
|              |           | <b>Mean</b>     | <b>4,215</b>  | <b>3,647</b>  | <b>1</b>      | <b>3,199</b>  | <b>3,530</b>  | <b>507</b>    | <b>3</b>  | <b>1</b>  | <b>6</b>      | <b>1,936</b>  | <b>5,542</b>  | <b>77,092</b> | <b>147,743</b> | <b>540</b>    |
|              | <b>SD</b> | <b>3,551</b>    | <b>10,037</b> | <b>2</b>      | <b>1,969</b>  | <b>2,227</b>  | <b>694</b>    | <b>6</b>      | <b>2</b>  | <b>13</b> | <b>1,574</b>  | <b>5,143</b>  | <b>13,844</b> | <b>16,997</b> | <b>539</b>     | <b>25,233</b> |

|                         |             |               |               |           |               |               |               |           |          |           |               |               |               |                |              |                |
|-------------------------|-------------|---------------|---------------|-----------|---------------|---------------|---------------|-----------|----------|-----------|---------------|---------------|---------------|----------------|--------------|----------------|
| <b>BET</b>              | 2009        | 266           | 6,571         | 0         | 1,614         | 2,606         | 112           | 0         | 0        | 0         | 557           | 931           | 9             | 59,593         | 1,964        | 74,223         |
|                         | 2010        | 11            | 126           | 0         | 645           | 1,909         | 211           | 0         | 0        | 0         | 233           | 948           | 12            | 48,119         | 998          | 53,212         |
|                         | 2011        | 0             | 115           | 6         | 2,078         | 1,727         | 498           | 0         | 0        | 0         | 617           | 702           | 0             | 44,960         | 204          | 50,907         |
|                         | 2012        | 3             | 35            | 0         | 1,784         | 2,565         | 362           | 0         | 0        | 14        | 305           | 1,017         | 0             | 54,935         | 113          | 61,133         |
|                         | 2013        | 485           | 924           | 0         | 2,218         | 3,166         | 222           | 0         | 2        | 14        | 277           | 1,723         | 3             | 51,416         | 298          | 60,748         |
|                         | 2014        | 478           | 61            | 0         | 402           | 2,369         | 685           | 0         | 0        | 2         | 556           | 3,026         | 35            | 52,815         | 400          | 60,829         |
|                         | 2015        | 993           | 45            | 0         | 688           | 2,460         | 156           | 12        | 0        | 0         | 498           | 2,224         | 0             | 65,264         | 101          | 72,441         |
|                         | 2016        | 435           | 103           | 1         | 3,533         | 2,048         | 6             | 0         | 0        | 0         | 609           | 439           | 4             | 57,710         | 25           | 64,913         |
|                         | 2017        | 1,087         | 24            | 0         | 3,279         | 2,348         | 7             | 0         | 0        | 0         | 889           | 2,728         | 48            | 63,810         | 805          | 75,025         |
|                         | 2018        | 2,117         | 64            | 0         | 1,038         | 5,870         | 192           | 0         | 0        | 0         | 715           | 4,519         | 2             | 54,571         | 2,313        | 71,401         |
|                         | <b>Mean</b> | <b>588</b>    | <b>807</b>    | <b>1</b>  | <b>1,728</b>  | <b>2,707</b>  | <b>245</b>    | <b>1</b>  | <b>0</b> | <b>3</b>  | <b>526</b>    | <b>1,826</b>  | <b>11</b>     | <b>55,319</b>  | <b>722</b>   | <b>64,483</b>  |
|                         | <b>SD</b>   | <b>660</b>    | <b>2,043</b>  | <b>2</b>  | <b>1,082</b>  | <b>1,182</b>  | <b>215</b>    | <b>4</b>  | <b>1</b> | <b>6</b>  | <b>206</b>    | <b>1,295</b>  | <b>17</b>     | <b>6,467</b>   | <b>813</b>   | <b>8,610</b>   |
| <b>All tuna species</b> | 2009        | 20,142        | 203,578       | 5         | 23,158        | 22,363        | 16,981        | 0         | 0        | 0         | 39,000        | 20,752        | 78,936        | 462,622        | 4,902        | 892,439        |
|                         | 2010        | 617           | 2,443         | 0         | 5,681         | 12,769        | 29,356        | 0         | 0        | 0         | 11,183        | 13,433        | 101,311       | 346,946        | 3,231        | 526,970        |
|                         | 2011        | 0             | 1,399         | 179       | 17,552        | 11,297        | 18,896        | 0         | 0        | 0         | 6,329         | 11,174        | 82,437        | 444,813        | 1,316        | 595,392        |
|                         | 2012        | 144           | 665           | 20        | 13,413        | 12,579        | 21,658        | 91        | 0        | 131       | 9,705         | 31,265        | 72,217        | 458,858        | 476          | 621,222        |
|                         | 2013        | 12,737        | 14,799        | 0         | 14,183        | 18,141        | 16,249        | 0         | 22       | 174       | 6,258         | 16,165        | 103,140       | 436,701        | 486          | 639,055        |
|                         | 2014        | 25,391        | 1,446         | 210       | 9,655         | 19,289        | 29,008        | 0         | 0        | 27        | 21,453        | 61,192        | 98,870        | 445,010        | 2,500        | 714,051        |
|                         | 2015        | 24,557        | 1,459         | 40        | 20,869        | 42,308        | 14,948        | 76        | 0        | 0         | 20,068        | 168,588       | 76,801        | 536,412        | 267          | 906,393        |
|                         | 2016        | 22,540        | 1,682         | 8         | 59,786        | 41,173        | 2,029         | 0         | 0        | 0         | 38,840        | 14,888        | 84,377        | 483,903        | 3,731        | 752,957        |
|                         | 2017        | 24,931        | 939           | 10        | 29,774        | 11,224        | 9,698         | 0         | 0        | 0         | 37,754        | 36,169        | 74,153        | 483,616        | 7,724        | 715,992        |
|                         | 2018        | 22,244        | 2,419         | 0         | 20,355        | 41,163        | 3,287         | 0         | 0        | 0         | 18,337        | 91,547        | 69,509        | 477,758        | 8,296        | 754,915        |
|                         | <b>Mean</b> | <b>15,330</b> | <b>23,083</b> | <b>47</b> | <b>21,443</b> | <b>23,231</b> | <b>16,211</b> | <b>17</b> | <b>2</b> | <b>33</b> | <b>20,893</b> | <b>46,517</b> | <b>84,175</b> | <b>457,664</b> | <b>3,293</b> | <b>711,939</b> |
|                         | <b>SD</b>   | <b>11,007</b> | <b>63,558</b> | <b>79</b> | <b>15,143</b> | <b>13,162</b> | <b>9,346</b>  | <b>35</b> | <b>7</b> | <b>64</b> | <b>13,281</b> | <b>49,904</b> | <b>12,529</b> | <b>48,323</b>  | <b>2,924</b> | <b>122,602</b> |

**Supplementary Table 5a.** *Average* projected percentage changes in biomass (relative to 2011–2020) of skipjack (SKJ), yellowfin (YFT) and bigeye (BET) tuna, and total biomass, in exclusive economic zones of 10 Pacific Small Island Developing States (Pacific SIDS) under RCP8.5 by 2050. Change in tonnes is also shown.

| Pacific SIDS        | Reference biomass (tonnes) |                  |                |                  | Relative abundance (%) |             |             | % change in reference biomass under RCP8.5 in 2050 |     |     |         | Biomass in 2050 (tonnes) | Change in biomass (tonnes) |
|---------------------|----------------------------|------------------|----------------|------------------|------------------------|-------------|-------------|----------------------------------------------------|-----|-----|---------|--------------------------|----------------------------|
|                     | SKJ                        | YFT              | BET            | TOTAL            | SKJ*                   | YFT*        | BET*        | SKJ                                                | YFT | BET | TOTAL** |                          |                            |
| Cook Islands        | 106,593                    | 79,372           | 38,968         | 224,933          | 47.4                   | 35.3        | 17.3        | -6                                                 | +11 | +2  | +1.4    | 228,048                  | + 3,115                    |
| FSM                 | 341,280                    | 299,670          | 97,815         | 738,765          | 46.2                   | 40.6        | 13.2        | -14                                                | -10 | -1  | -10.7   | 660,041                  | -78,724                    |
| Kiribati–Gilbert Is | 336,009                    | 134,529          | 35,998         | 506,536          | 66.3                   | 26.6        | 7.1         | -14                                                | -13 | -4  | -13.0   | 440,566                  | -65,970                    |
| Kiribati–Phoenix Is | 202,849                    | 80,528           | 24,810         | 308,187          | 65.8                   | 26.1        | 8.1         | -2                                                 | -7  | -5  | -3.5    | 297,253                  | -10,934                    |
| Kiribati–Line Is    | 250,078                    | 141,321          | 57,758         | 449,157          | 55.7                   | 31.5        | 12.9        | +14                                                | +7  | +1  | +10.1   | 494,638                  | + 45,481                   |
| Marshall Islands    | 178,892                    | 198,363          | 60,664         | 437,919          | 40.9                   | 45.3        | 13.9        | +1                                                 | -10 | -2  | -4.4    | 418,658                  | -19,261                    |
| Nauru               | 92,146                     | 30,347           | 7,976          | 130,469          | 70.6                   | 23.3        | 6.1         | -24                                                | -15 | -5  | -20.7   | 103,403                  | -27,066                    |
| Palau               | 62,544                     | 58,943           | 22,194         | 143,681          | 43.5                   | 41.0        | 15.4        | 0                                                  | -1  | +1  | -0.3    | 143,314                  | -367                       |
| PNG                 | 554,428                    | 248,820          | 71,292         | 874,540          | 63.4                   | 28.5        | 8.2         | -42                                                | -14 | -6  | -31.1   | 602,568                  | - 271,972                  |
| Solomon Islands     | 267,111                    | 138,747          | 40,297         | 446,155          | 59.9                   | 31.1        | 9.0         | -32                                                | -11 | -6  | -23.1   | 342,999                  | - 103,156                  |
| Tokelau             | 63,731                     | 30,688           | 11,113         | 105,532          | 60.4                   | 29.1        | 10.5        | -18                                                | +1  | -4  | -11.0   | 93,923                   | -11,609                    |
| Tuvalu              | 117,569                    | 55,562           | 18,089         | 191,220          | 61.5                   | 29.1        | 9.5         | -26                                                | -5  | -6  | -18.0   | 156,789                  | -34,431                    |
| <b>Total</b>        | <b>2,573,230</b>           | <b>1,496,890</b> | <b>486,974</b> | <b>4,557,094</b> | <b>56.5</b>            | <b>32.8</b> | <b>10.7</b> |                                                    |     |     |         | <b>3,982,199</b>         | <b>- 574,895 (-12.6%)</b>  |

\* Rounded to one decimal place; \*\* weighted average of projected changes in reference biomass for SKJ, YFT and BET

**Supplementary Table 5b. Maximum** (i.e., maximum negative/minimum positive) projected percentage changes in biomass (relative to 2011–2020) of skipjack (SKJ), yellowfin (YFT) and bigeye (BET) tuna, and total biomass, in the exclusive economic zones of the 10 Pacific Small Island Developing States (Pacific SIDS) under RCP8.5 by 2050. Change in tonnes is also shown.

| Pacific SIDS        | Reference biomass (tonnes) |                  |                |                  | Relative abundance (%) |             |             | % change in reference biomass under RCP8.5 in 2050 |     |     |         | Biomass in 2050 (tonnes) | Change in biomass (tonnes) |
|---------------------|----------------------------|------------------|----------------|------------------|------------------------|-------------|-------------|----------------------------------------------------|-----|-----|---------|--------------------------|----------------------------|
|                     | SKJ                        | YFT              | BET            | TOTAL            | SKJ*                   | YFT*        | BET*        | SKJ                                                | YFT | BET | TOTAL** |                          |                            |
| Cook Islands        | 106,593                    | 79,372           | 38,968         | 224,933          | 47.4                   | 35.3        | 17.3        | -10                                                | +3  | -1  | -3.9    | 216,265                  | -8,668                     |
| FSM                 | 341,280                    | 299,670          | 97,815         | 738,765          | 46.2                   | 40.6        | 13.2        | -24                                                | -13 | -4  | -16.9   | 613,988                  | -124,777                   |
| Kiribati–Gilbert Is | 336,009                    | 134,529          | 35,998         | 506,536          | 66.3                   | 26.6        | 7.1         | -29                                                | -15 | -5  | -23.6   | 387,114                  | -119,422                   |
| Kiribati–Phoenix Is | 202,849                    | 80,528           | 24,810         | 308,187          | 65.8                   | 26.1        | 8.1         | -13                                                | -9  | -6  | -11.4   | 273,081                  | -35,106                    |
| Kiribati–Line Is    | 250,078                    | 141,321          | 57,758         | 449,157          | 55.7                   | 31.5        | 12.9        | +9                                                 | +2  | -1  | +5.5    | 473,913                  | +24,756                    |
| Marshall Islands    | 178,892                    | 198,363          | 60,664         | 437,919          | 40.9                   | 45.3        | 13.9        | -8                                                 | -13 | -6  | -10.0   | 394,181                  | -43,738                    |
| Nauru               | 92,146                     | 30,347           | 7,976          | 130,469          | 70.6                   | 23.3        | 6.1         | -43                                                | -19 | -5  | -35.1   | 84,681                   | -45,788                    |
| Palau               | 62,544                     | 58,943           | 22,194         | 143,681          | 43.5                   | 41.0        | 15.4        | -12                                                | -5  | -1  | -7.4    | 133,007                  | -10,674                    |
| PNG                 | 554,428                    | 248,820          | 71,292         | 874,540          | 63.4                   | 28.5        | 8.2         | -54                                                | -20 | -7  | -40.5   | 520,394                  | -354,146                   |
| Solomon Islands     | 267,111                    | 138,747          | 40,297         | 446,155          | 59.9                   | 31.1        | 9.0         | -46                                                | -13 | -8  | -32.3   | 302,023                  | -144,132                   |
| Tokelau             | 63,731                     | 30,688           | 11,113         | 105,532          | 60.4                   | 29.1        | 10.5        | -22                                                | -5  | -7  | -15.5   | 89,199                   | -16,333                    |
| Tuvalu              | 117,569                    | 55,562           | 18,089         | 191,220          | 61.5                   | 29.1        | 9.5         | -35                                                | -9  | -8  | -24.9   | 143,623                  | -47,597                    |
| <b>Total</b>        | <b>2,573,230</b>           | <b>1,496,890</b> | <b>486,974</b> | <b>4,557,094</b> | <b>56.5</b>            | <b>32.8</b> | <b>10.7</b> |                                                    |     |     |         | <b>3,631,469</b>         | <b>- 925,625 (-20.3%)</b>  |

\* Rounded to one decimal place; \*\* weighted average of projected changes in reference biomass for SKJ, YFT and BET

**Supplementary Table 5c. *Minimum*** (i.e., minimum negative/maximum positive) projected percentage changes in biomass (relative to 2011–2020) of skipjack (SKJ), yellowfin (YFT) and bigeye (BET) tuna, and total biomass, in the exclusive economic zones of the 10 Pacific Small Island Developing States (Pacific SIDS) under RCP8.5 by 2050. Change in tonnes is also shown.

| Pacific SIDS        | Reference biomass (tonnes) |                  |                |                  | Relative abundance (%) |             |             | % change in reference biomass under RCP8.5 in 2050 |     |     |         | Biomass in 2050 (tonnes) | Change in biomass (tonnes) |
|---------------------|----------------------------|------------------|----------------|------------------|------------------------|-------------|-------------|----------------------------------------------------|-----|-----|---------|--------------------------|----------------------------|
|                     | SKJ                        | YFT              | BET            | TOTAL            | SKJ*                   | YFT*        | BET*        | SKJ                                                | YFT | BET | TOTAL** |                          |                            |
| Cook Islands        | 106,593                    | 79,372           | 38,968         | 224,933          | 47.4                   | 35.3        | 17.3        | -1                                                 | +18 | +7  | +7.1    | 240,882                  | +15,949                    |
| FSM                 | 341,280                    | 299,670          | 97,815         | 738,765          | 46.2                   | 40.6        | 13.2        | -5                                                 | -7  | +3  | -4.8    | 703,659                  | -35,106                    |
| Kiribati–Gilbert Is | 336,009                    | 134,529          | 35,998         | 506,536          | 66.3                   | 26.6        | 7.1         | -1                                                 | -10 | -3  | -3.5    | 488,643                  | -17,893                    |
| Kiribati–Phoenix Is | 202,849                    | 80,528           | 24,810         | 308,187          | 65.8                   | 26.1        | 8.1         | +5                                                 | -5  | -4  | +1.7    | 313,311                  | +5,124                     |
| Kiribati–Line Is    | 250,078                    | 141,321          | 57,758         | 449,157          | 55.7                   | 31.5        | 12.9        | +20                                                | +13 | +3  | +15.6   | 519,277                  | +70,120                    |
| Marshall Islands    | 178,892                    | 198,363          | 60,664         | 437,919          | 40.9                   | 45.3        | 13.9        | +8                                                 | -8  | +1  | -0.2    | 436,968                  | -951                       |
| Nauru               | 92,146                     | 30,347           | 7,976          | 130,469          | 70.6                   | 23.3        | 6.1         | -5                                                 | -11 | -4  | -6.3    | 122,204                  | -8,265                     |
| Palau               | 62,544                     | 58,943           | 22,194         | 143,681          | 43.5                   | 41.0        | 15.4        | +19                                                | +1  | +5  | +9.5    | 157,263                  | +13,582                    |
| PNG                 | 554,428                    | 248,820          | 71,292         | 874,540          | 63.4                   | 28.5        | 8.2         | -28                                                | -9  | -5  | -20.7   | 693,342                  | -181,198                   |
| Solomon Islands     | 267,111                    | 138,747          | 40,297         | 446,155          | 59.9                   | 31.1        | 9.0         | -21                                                | -8  | -5  | -15.5   | 376,947                  | -69,208                    |
| Tokelau             | 63,731                     | 30,688           | 11,113         | 105,532          | 60.4                   | 29.1        | 10.5        | -6                                                 | +6  | -1  | -2.0    | 103,438                  | -2,094                     |
| Tuvalu              | 117,569                    | 55,562           | 18,089         | 191,220          | 61.5                   | 29.1        | 9.5         | -16                                                | -2  | -4  | -10.8   | 170,574                  | -20,646                    |
| <b>Total</b>        | <b>2,573,230</b>           | <b>1,496,890</b> | <b>486,974</b> | <b>4,557,094</b> | <b>56.5</b>            | <b>32.8</b> | <b>10.7</b> |                                                    |     |     |         | <b>4,326,508</b>         | <b>-230,586 (-5.1%)</b>    |

\* Rounded to one decimal place; \*\* weighted average of projected changes in reference biomass for SKJ, YFT and BET

**Supplementary Table 6a.** Average projected percentage changes in biomass (relative to 2011–2020) of skipjack (SKJ), yellowfin (YFT) and bigeye (BET) tuna, and in total biomass, in high-seas areas under RCP8.5 by 2050. Change in tonnes is also shown.

| High-seas area | Reference biomass (tonnes) |                  |                  |                  | Relative abundance (%) |             |             | % change in reference biomass under RCP8.5 in 2050 |     |     |         | Biomass in 2050 (tonnes) | Change in biomass (tonnes) |
|----------------|----------------------------|------------------|------------------|------------------|------------------------|-------------|-------------|----------------------------------------------------|-----|-----|---------|--------------------------|----------------------------|
|                | SKJ                        | YFT              | BET              | TOTAL            | SKJ*                   | YFT*        | BET*        | SKJ                                                | YFT | BET | TOTAL** |                          |                            |
| I1             | 81,609                     | 45,234           | 15,605           | 142,448          | 57.3                   | 31.8        | 11.0        | -34                                                | -8  | -3  | -22.3   | 110,614                  | -31,834                    |
| I2             | 267,205                    | 96,116           | 27,397           | 390,718          | 68.4                   | 24.6        | 7.0         | -33                                                | -13 | -6  | -26.2   | 288,401                  | -102,317                   |
| I3             | 278,796                    | 169,837          | 74,682           | 523,315          | 53.3                   | 32.5        | 14.3        | +29                                                | +3  | +2  | +16.7   | 610,755                  | + 87,440                   |
| I4             | 282,157                    | 267,491          | 90,847           | 640,495          | 44.1                   | 41.8        | 14.2        | +3                                                 | -3  | -4  | -0.5    | 637,301                  | -3,194                     |
| I5             | 337,986                    | 331,911          | 149,952          | 819,849          | 41.2                   | 40.5        | 18.3        | +26                                                | +9  | +2  | +14.7   | 940,596                  | + 120,747                  |
| I6             | 218,353                    | 438,615          | 439,387          | 1,096,355        | 19.9                   | 40.0        | 40.1        | +4                                                 | +9  | -3  | +3.2    | 1,131,383                | +35,028                    |
| I7             | 34,044                     | 253,788          | 301,782          | 589,614          | 5.8                    | 43.0        | 51.2        | +10                                                | +9  | -2  | +3.4    | 609,824                  | +20,210                    |
| I8             | 3,969                      | 7,550            | 2,899            | 14,418           | 27.5                   | 52.4        | 20.1        | +23                                                | 0   | -2  | +5.9    | 15,273                   | +855                       |
| I9             | 3,487                      | 5,917            | 3,201            | 12,605           | 27.7                   | 46.9        | 25.4        | +29                                                | +18 | +4  | +17.5   | 14,809                   | +2,204                     |
| H4             | 50,735                     | 19,144           | 6,161            | 76,040           | 66.7                   | 25.2        | 8.1         | -16                                                | -6  | -6  | -12.7   | 66,404                   | - 9,636                    |
| H5             | 135,924                    | 63,112           | 21,508           | 220,544          | 61.6                   | 28.6        | 9.8         | +8                                                 | -2  | -2  | +4.2    | 229,726                  | + 9,182                    |
| EPO-N          | 209,308                    | 325,252          | 211,984          | 746,544          | 28.0                   | 43.6        | 28.4        | +12                                                | +20 | +11 | +15.2   | 860,030                  | +113,486                   |
| EPO-C          | 853,639                    | 1,230,664        | 799,917          | 2,884,220        | 29.6                   | 42.7        | 27.7        | +32                                                | +26 | +10 | +23.3   | 3,557,349                | +673,129                   |
| EPO-S          | 18,127                     | 91,127           | 217,864          | 327,118          | 5.5                    | 27.9        | 66.6        | +36                                                | +41 | +13 | +22.1   | 399,328                  | +72,210                    |
| <b>Total</b>   | <b>2,775,339</b>           | <b>3,345,758</b> | <b>2,363,186</b> | <b>8,484,283</b> | <b>32.7</b>            | <b>39.4</b> | <b>27.9</b> |                                                    |     |     |         | <b>9,471,793</b>         | <b>+987,510 (+11.6%)</b>   |

\* Rounded to one decimal place; \*\* weighted average of projected changes in reference biomass for SKJ, YFT and BET

**Supplementary Table 6b. Maximum** (i.e., maximum negative/minimum positive) projected percentage changes in biomass (relative to 2011–2020) of skipjack (SKJ), yellowfin (YFT) and bigeye (BET) tuna, and in total biomass, in high-seas areas under RCP8.5 by 2050. Change in tonnes is also shown.

| High-seas area | Reference biomass (tonnes) |                  |                  |                  | Relative abundance (%) |             |             | % change in reference biomass under RCP8.5 in 2050 |     |     |         | Biomass in 2050 (tonnes) | Change in biomass (tonnes) |
|----------------|----------------------------|------------------|------------------|------------------|------------------------|-------------|-------------|----------------------------------------------------|-----|-----|---------|--------------------------|----------------------------|
|                | SKJ                        | YFT              | BET              | TOTAL            | SKJ*                   | YFT*        | BET*        | SKJ                                                | YFT | BET | TOTAL** |                          |                            |
| I1             | 81,609                     | 45,234           | 15,605           | 142,448          | 57.3                   | 31.8        | 11.0        | -50                                                | -12 | -6  | -33.1   | 95,279                   | -47,169                    |
| I2             | 267,205                    | 96,116           | 27,397           | 390,718          | 68.4                   | 24.6        | 7.0         | -51                                                | -16 | -8  | -39.4   | 236,873                  | -153,845                   |
| I3             | 278,796                    | 169,837          | 74,682           | 523,315          | 53.3                   | 32.5        | 14.3        | +9                                                 | -1  | 0   | +4.5    | 546,708                  | +23,393                    |
| I4             | 282,157                    | 267,491          | 90,847           | 640,495          | 44.1                   | 41.8        | 14.2        | -7                                                 | -7  | -6  | -6.9    | 596,569                  | -43,926                    |
| I5             | 337,986                    | 331,911          | 149,952          | 819,849          | 41.2                   | 40.5        | 18.3        | +13                                                | +3  | -2  | +6.2    | 870,745                  | +50,896                    |
| I6             | 218,353                    | 438,615          | 439,387          | 1,096,355        | 19.9                   | 40.0        | 40.1        | -10                                                | +3  | -6  | -3.2    | 1,061,315                | -35,040                    |
| I7             | 34,044                     | 253,788          | 301,782          | 589,614          | 5.8                    | 43.0        | 51.2        | +1                                                 | +2  | -6  | -2.2    | 576,923                  | -12,691                    |
| I8             | 3,969                      | 7,550            | 2,899            | 14,418           | 27.5                   | 52.4        | 20.1        | -7                                                 | -5  | -4  | -5.3    | 13,647                   | -771                       |
| I9             | 3,487                      | 5,917            | 3,201            | 12,605           | 27.7                   | 46.9        | 25.4        | +19                                                | +7  | +1  | +8.8    | 13,714                   | +1,109                     |
| H4             | 50,735                     | 19,144           | 6,161            | 76,040           | 66.7                   | 25.2        | 8.1         | -26                                                | -10 | -7  | -20.4   | 60,503                   | -15,537                    |
| H5             | 135,924                    | 63,112           | 21,508           | 220,544          | 61.6                   | 28.6        | 9.8         | 0                                                  | -6  | -4  | -2.1    | 215,897                  | -4,647                     |
| EPO-N          | 209,308                    | 325,252          | 211,984          | 746,544          | 28.0                   | 43.6        | 28.4        | +2                                                 | +14 | +6  | +8.4    | 808,984                  | +62,440                    |
| EPO-C          | 853,639                    | 1,230,664        | 799,917          | 2,884,220        | 29.6                   | 42.7        | 27.7        | +16                                                | +17 | +5  | +13.4   | 3,270,011                | +385,791                   |
| EPO-S          | 18,127                     | 91,127           | 217,864          | 327,118          | 5.5                    | 27.9        | 66.6        | +23                                                | +25 | +6  | +12.2   | 367,141                  | 40,023                     |
| <b>Total</b>   | <b>2,775,339</b>           | <b>3,345,758</b> | <b>2,363,186</b> | <b>8,484,283</b> | <b>32.7</b>            | <b>39.4</b> | <b>27.9</b> |                                                    |     |     |         | <b>8,734,310</b>         | <b>+250,027 (+2.9%)</b>    |

\* Rounded to one decimal place; \*\* weighted average of projected changes in reference biomass for SKJ, YFT and BET

**Supplementary Table 6c. *Minimum*** (i.e., minimum negative/maximum positive) projected percentage changes in biomass (relative to 2011–2020) of skipjack (SKJ), yellowfin (YFT) and bigeye (BET) tuna, and in total biomass, in high-seas areas under RCP8.5 by 2050. Change in tonnes is also shown.

| High-seas area | Reference biomass (tonnes) |                  |                  |                  | Relative abundance (%) |             |             | % change in reference biomass under RCP8.5 in 2050 |     |     |         | Biomass in 2050 (tonnes) | Change in biomass (tonnes) |
|----------------|----------------------------|------------------|------------------|------------------|------------------------|-------------|-------------|----------------------------------------------------|-----|-----|---------|--------------------------|----------------------------|
|                | SKJ                        | YFT              | BET              | TOTAL            | SKJ*                   | YFT*        | BET*        | SKJ                                                | YFT | BET | TOTAL** |                          |                            |
| I1             | 81,609                     | 45,234           | 15,605           | 142,448          | 57.3                   | 31.8        | 11.0        | -15                                                | -3  | -1  | -9.7    | 128,694                  | -13,754                    |
| I2             | 267,205                    | 96,116           | 27,397           | 390,718          | 68.4                   | 24.6        | 7.0         | -17                                                | -10 | -5  | -14.4   | 334,312                  | -56,406                    |
| I3             | 278,796                    | 169,837          | 74,682           | 523,315          | 53.3                   | 32.5        | 14.3        | +47                                                | +7  | +5  | 28.0    | 669,972                  | +146,657                   |
| I4             | 282,157                    | 267,491          | 90,847           | 640,495          | 44.1                   | 41.8        | 14.2        | +9                                                 | +3  | -1  | +5.1    | 673,005                  | +32,510                    |
| I5             | 337,986                    | 331,911          | 149,952          | 819,849          | 41.2                   | 40.5        | 18.3        | +41                                                | +20 | +4  | 25.7    | 1,030,804                | +210,955                   |
| I6             | 218,353                    | 438,615          | 439,387          | 1,096,355        | 19.9                   | 40.0        | 40.1        | +16                                                | +17 | +1  | +10.4   | 1,210,250                | + 113,895                  |
| I7             | 34,044                     | 253,788          | 301,782          | 589,614          | 5.8                    | 43.0        | 51.2        | +30                                                | +18 | +6  | +12.6   | 663,616                  | +74,002                    |
| I8             | 3,969                      | 7,550            | 2,899            | 14,418           | 27.5                   | 52.4        | 20.1        | +48                                                | +4  | 0   | +15.3   | 16,625                   | +2,207                     |
| I9             | 3,487                      | 5,917            | 3,201            | 12,605           | 27.7                   | 46.9        | 25.4        | +48                                                | +27 | +9  | +28.2   | 16,164                   | +3,559                     |
| H4             | 50,735                     | 19,144           | 6,161            | 76,040           | 66.7                   | 25.2        | 8.1         | -9                                                 | -4  | -4  | -7.3    | 70,462                   | -5,578                     |
| H5             | 135,924                    | 63,112           | 21,508           | 220,544          | 61.6                   | 28.6        | 9.8         | +12                                                | +1  | -1  | +7.6    | 237,271                  | +16,727                    |
| EPO-N          | 209,308                    | 325,252          | 211,984          | 746,544          | 28.0                   | 43.6        | 28.4        | +19                                                | +25 | +18 | +21.3   | 905,783                  | +159,239                   |
| EPO-C          | 853,639                    | 1,230,664        | 799,917          | 2,884,220        | 29.6                   | 42.7        | 27.7        | +43                                                | +35 | +14 | +31.5   | 3,794,006                | +909,786                   |
| EPO-S          | 18,127                     | 91,127           | 217,864          | 327,118          | 5.5                    | 27.9        | 66.6        | +48                                                | +63 | +24 | +36.2   | 445,516                  | + 118,398                  |
| <b>Total</b>   | <b>2,775,339</b>           | <b>3,345,758</b> | <b>2,363,186</b> | <b>8,484,283</b> | <b>32.7</b>            | <b>39.4</b> | <b>27.9</b> |                                                    |     |     |         | <b>10,196,479</b>        | <b>+1,712,196 (+20.2%)</b> |

\* Rounded to one decimal place; \*\* weighted average of projected changes in reference biomass for SKJ, YFT and BET



**Supplementary Table 7a.** *Average* projected percentage changes in biomass (relative to 2011–2020) of skipjack (SKJ), yellowfin (YFT) and bigeye (BET) tuna, and total biomass, in the exclusive economic zones of the 10 Pacific Small Island Developing States (Pacific SIDS) under RCP4.5 by 2050. Change in tonnes is also shown.

| Pacific SIDS        | Reference biomass (tonnes) |                  |                |                  | Relative abundance (%) |             |             | % change in reference biomass under RCP4.5 in 2050 |     |     |         | Biomass in 2050 (tonnes) | Change in biomass (tonnes) |
|---------------------|----------------------------|------------------|----------------|------------------|------------------------|-------------|-------------|----------------------------------------------------|-----|-----|---------|--------------------------|----------------------------|
|                     | SKJ                        | YFT              | BET            | TOTAL            | SKJ*                   | YFT*        | BET*        | SKJ                                                | YFT | BET | TOTAL** |                          |                            |
| Cook Islands        | 106,593                    | 79,372           | 38,968         | 224,933          | 47.4                   | 35.3        | 17.3        | +9                                                 | +10 | +4  | +8.5    | 244,022                  | +19,089                    |
| FSM                 | 341,280                    | 299,670          | 97,815         | 738,765          | 46.2                   | 40.6        | 13.2        | -3                                                 | -2  | +2  | -1.9    | 724,490                  | - 4,276                    |
| Kiribati–Gilbert Is | 336,009                    | 134,529          | 35,998         | 506,536          | 66.3                   | 26.6        | 7.1         | +10                                                | -5  | -1  | +5.2    | 533,050                  | +26,514                    |
| Kiribati–Phoenix Is | 202,849                    | 80,528           | 24,810         | 308,187          | 65.8                   | 26.1        | 8.1         | +8                                                 | 0   | +1  | +5.3    | 324,663                  | +16,476                    |
| Kiribati–Line Is    | 250,078                    | 141,321          | 57,758         | 449,157          | 55.7                   | 31.5        | 12.9        | +6                                                 | +12 | +6  | +7.9    | 484,586                  | + 35,429                   |
| Marshall Islands    | 178,892                    | 198,363          | 60,664         | 437,919          | 40.9                   | 45.3        | 13.9        | +3                                                 | -2  | -1  | +0.2    | 438,712                  | +793                       |
| Nauru               | 92,146                     | 30,347           | 7,976          | 130,469          | 70.6                   | 23.3        | 6.1         | +9                                                 | -7  | -2  | +4.6    | 136,478                  | +6,009                     |
| Palau               | 62,544                     | 58,943           | 22,194         | 143,681          | 43.5                   | 41.0        | 15.4        | +2                                                 | +5  | +5  | +3.7    | 148,989                  | +5,308                     |
| PNG                 | 554,428                    | 248,820          | 71,292         | 874,540          | 63.4                   | 28.5        | 8.2         | -19                                                | -8  | -4  | -14.6   | 746,441                  | -128,099                   |
| Solomon Islands     | 267,111                    | 138,747          | 40,297         | 446,155          | 59.9                   | 31.1        | 9.0         | -10                                                | -5  | -7  | -8.2    | 409,686                  | -36,469                    |
| Tokelau             | 63,731                     | 30,688           | 11,113         | 105,532          | 60.4                   | 29.1        | 10.5        | +6                                                 | +5  | -1  | +5.0    | 110,779                  | +5,247                     |
| Tuvalu              | 117,569                    | 55,562           | 18,089         | 191,220          | 61.5                   | 29.1        | 9.5         | +4                                                 | 0   | -2  | +2.3    | 195,561                  | +4,341                     |
| <b>Total</b>        | <b>2,573,230</b>           | <b>1,496,890</b> | <b>486,974</b> | <b>4,557,094</b> | <b>56.5</b>            | <b>32.8</b> | <b>10.7</b> |                                                    |     |     |         | <b>4,497,457</b>         | <b>-59,637 (-1.3%)</b>     |

\* Rounded to one decimal place; \*\* weighted average of projected changes in reference biomass for SKJ, YFT and BET

**Supplementary Table 7b. Maximum** (i.e., maximum negative/minimum positive) projected percentage changes in biomass (relative to 2011–2020) of skipjack (SKJ), yellowfin (YFT) and bigeye (BET) tuna, and total biomass, in the exclusive economic zones of the 10 Pacific Small Island Developing States (Pacific SIDS) under RCP4.5 by 2050. Change in tonnes is also shown.

| Pacific SIDS        | Reference biomass (tonnes) |                  |                |                  | Relative abundance (%) |             |             | % change in reference biomass under RCP4.5 in 2050 |     |     |         | Biomass in 2050 (tonnes) | Change in biomass (tonnes) |
|---------------------|----------------------------|------------------|----------------|------------------|------------------------|-------------|-------------|----------------------------------------------------|-----|-----|---------|--------------------------|----------------------------|
|                     | SKJ                        | YFT              | BET            | TOTAL            | SKJ*                   | YFT*        | BET*        | SKJ                                                | YFT | BET | TOTAL** |                          |                            |
| Cook Islands        | 106,593                    | 79,372           | 38,968         | 224,933          | 47.4                   | 35.3        | 17.3        | -9                                                 | +3  | +1  | -3.0    | 218,110                  | -6,823                     |
| FSM                 | 341,280                    | 299,670          | 97,815         | 738,765          | 46.2                   | 40.6        | 13.2        | -11                                                | -6  | -3  | -7.9    | 680,310                  | -58,455                    |
| Kiribati–Gilbert Is | 336,009                    | 134,529          | 35,998         | 506,536          | 66.3                   | 26.6        | 7.1         | -1                                                 | -8  | -5  | -3.1    | 490,614                  | -15,922                    |
| Kiribati–Phoenix Is | 202,849                    | 80,528           | 24,810         | 308,187          | 65.8                   | 26.1        | 8.1         | +2                                                 | -2  | -3  | 0.6     | 309,889                  | +1,702                     |
| Kiribati–Line Is    | 250,078                    | 141,321          | 57,758         | 449,157          | 55.7                   | 31.5        | 12.9        | -6                                                 | +7  | +3  | -0.8    | 445,778                  | -3,379                     |
| Marshall Islands    | 178,892                    | 198,363          | 60,664         | 437,919          | 40.9                   | 45.3        | 13.9        | -6                                                 | -7  | -6  | -6.5    | 409,660                  | -28,259                    |
| Nauru               | 92,146                     | 30,347           | 7,976          | 130,469          | 70.6                   | 23.3        | 6.1         | -3                                                 | -10 | -6  | -4.8    | 124,191                  | -6,278                     |
| Palau               | 62,544                     | 58,943           | 22,194         | 143,681          | 43.5                   | 41.0        | 15.4        | -9                                                 | +3  | +1  | -2.5    | 140,042                  | -3,639                     |
| PNG                 | 554,428                    | 248,820          | 71,292         | 874,540          | 63.4                   | 28.5        | 8.2         | -29                                                | -10 | -8  | -21.9   | 683,171                  | -191,369                   |
| Solomon Islands     | 267,111                    | 138,747          | 40,297         | 446,155          | 59.9                   | 31.1        | 9.0         | -25                                                | -8  | -10 | -18.4   | 364,248                  | -81,907                    |
| Tokelau             | 63,731                     | 30,688           | 11,113         | 105,532          | 60.4                   | 29.1        | 10.5        | -11                                                | 0   | -3  | -7.0    | 98,188                   | -7,344                     |
| Tuvalu              | 117,569                    | 55,562           | 18,089         | 191,220          | 61.5                   | 29.1        | 9.5         | -5                                                 | -4  | -5  | -4.7    | 182,215                  | -9,005                     |
| <b>Total</b>        | <b>2,573,230</b>           | <b>1,496,890</b> | <b>486,974</b> | <b>4,557,094</b> | <b>56.5</b>            | <b>32.8</b> | <b>10.7</b> |                                                    |     |     |         | <b>4,146,415</b>         | <b>-410,679 (-9.0%)</b>    |

\* Rounded to one decimal place; \*\* weighted average of projected changes in reference biomass for SKJ, YFT and BET

**Supplementary Table 7c. *Minimum*** (i.e., minimum negative/maximum positive) projected percentage changes in biomass (relative to 2011–2020) of skipjack (SKJ), yellowfin (YFT) and bigeye (BET) tuna, and total biomass, in the exclusive economic zones of the 10 Pacific Small Island Developing States (Other Pacific SIDS) under RCP4.5 by 2050. Change in tonnes is also shown.

| Pacific SIDS        | Reference biomass (tonnes) |                  |                |                  | Relative abundance (%) |             |             | % change in reference biomass under RCP4.5 in 2050 |     |     |         | Biomass in 2050 (tonnes) | Change in biomass (tonnes) |
|---------------------|----------------------------|------------------|----------------|------------------|------------------------|-------------|-------------|----------------------------------------------------|-----|-----|---------|--------------------------|----------------------------|
|                     | SKJ                        | YFT              | BET            | TOTAL            | SKJ*                   | YFT*        | BET*        | SKJ                                                | YFT | BET | TOTAL** |                          |                            |
| Cook Islands        | 106,593                    | 79,372           | 38,968         | 224,933          | 47.4                   | 35.3        | 17.3        | +27                                                | +19 | +9  | +21.1   | 272,301                  | +47,368                    |
| FSM                 | 341,280                    | 299,670          | 97,815         | 738,765          | 46.2                   | 40.6        | 13.2        | +5                                                 | +2  | +5  | +3.8    | 766,713                  | +27,948                    |
| Kiribati–Gilbert Is | 336,009                    | 134,529          | 35,998         | 506,536          | 66.3                   | 26.6        | 7.1         | +21                                                | -3  | +2  | +13.3   | 573,782                  | +67,246                    |
| Kiribati–Phoenix Is | 202,849                    | 80,528           | 24,810         | 308,187          | 65.8                   | 26.1        | 8.1         | +14                                                | +3  | +4  | +10.3   | 339,994                  | +31,807                    |
| Kiribati–Line Is    | 250,078                    | 141,321          | 57,758         | 449,157          | 55.7                   | 31.5        | 12.9        | +11                                                | +16 | +10 | +12.4   | 505,053                  | +55,896                    |
| Marshall Islands    | 178,892                    | 198,363          | 60,664         | 437,919          | 40.9                   | 45.3        | 13.9        | +14                                                | 0   | +2  | +6.0    | 464,177                  | +26,258                    |
| Nauru               | 92,146                     | 30,347           | 7,976          | 130,469          | 70.6                   | 23.3        | 6.1         | +22                                                | -2  | 0   | +15.1   | 150,134                  | +19,665                    |
| Palau               | 62,544                     | 58,943           | 22,194         | 143,681          | 43.5                   | 41.0        | 15.4        | +20                                                | +8  | +9  | +13.4   | 162,903                  | +19,222                    |
| PNG                 | 554,428                    | 248,820          | 71,292         | 874,540          | 63.4                   | 28.5        | 8.2         | +2                                                 | -2  | -1  | +0.6    | 879,939                  | +5,399                     |
| Solomon Islands     | 267,111                    | 138,747          | 40,297         | 446,155          | 59.9                   | 31.1        | 9.0         | +9                                                 | -2  | -5  | +4.3    | 465,405                  | +19,250                    |
| Tokelau             | 63,731                     | 30,688           | 11,113         | 105,532          | 60.4                   | 29.1        | 10.5        | +33                                                | +13 | +4  | +24.1   | 130,997                  | +25,465                    |
| Tuvalu              | 117,569                    | 55,562           | 18,089         | 191,220          | 61.5                   | 29.1        | 9.5         | +22                                                | +6  | +2  | +15.5   | 220,781                  | +29,561                    |
| <b>Total</b>        | <b>2,573,230</b>           | <b>1,496,890</b> | <b>486,974</b> | <b>4,557,094</b> | <b>56.5</b>            | <b>32.8</b> | <b>10.7</b> |                                                    |     |     |         | <b>4,932,179</b>         | <b>+375,085 (+8.2%)</b>    |

\* Rounded to one decimal place; \*\* weighted average of projected changes in reference biomass for SKJ, YFT and BET

**Supplementary Table 8a.** Average projected percentage changes in biomass (relative to 2011–2020) of skipjack (SKJ), yellowfin (YFT) and bigeye (BET) tuna, and in total biomass, in high-seas areas under RCP4.5 by 2050. Change in tonnes is also shown.

| High-seas area | Reference biomass (tonnes) |                  |                  |                  | Relative abundance (%) |             |             | % change in reference biomass under RCP4.5 in 2050 |     |     |         | Biomass in 2050 (tonnes) | Change in biomass (tonnes) |
|----------------|----------------------------|------------------|------------------|------------------|------------------------|-------------|-------------|----------------------------------------------------|-----|-----|---------|--------------------------|----------------------------|
|                | SKJ                        | YFT              | BET              | TOTAL            | SKJ*                   | YFT*        | BET*        | SKJ                                                | YFT | BET | TOTAL** |                          |                            |
| I1             | 81,609                     | 45,234           | 15,605           | 142,448          | 57.3                   | 31.8        | 11.0        | -17                                                | 0   | 0   | -9.7    | 128,574                  | -13,874                    |
| I2             | 267,205                    | 96,116           | 27,397           | 390,718          | 68.4                   | 24.6        | 7.0         | -11                                                | -7  | -5  | -9.6    | 353,227                  | -37,491                    |
| I3             | 278,796                    | 169,837          | 74,682           | 523,315          | 53.3                   | 32.5        | 14.3        | +31                                                | +6  | +3  | +18.9   | 622,172                  | +98,857                    |
| I4             | 282,157                    | 267,491          | 90,847           | 640,495          | 44.1                   | 41.8        | 14.2        | +7                                                 | +4  | 0   | +4.8    | 670,946                  | +30,451                    |
| I5             | 337,986                    | 331,911          | 149,952          | 819,849          | 41.2                   | 40.5        | 18.3        | +13                                                | +16 | +7  | +13.1   | 927,390                  | +107,541                   |
| I6             | 218,353                    | 438,615          | 439,387          | 1,096,355        | 19.9                   | 40.0        | 40.1        | +10                                                | +9  | -1  | +5.2    | 1,153,272                | +56,917                    |
| I7             | 34,044                     | 253,788          | 301,782          | 589,614          | 5.8                    | 43.0        | 51.2        | 0                                                  | +8  | 0   | +3.4    | 609,917                  | +20,303                    |
| I8             | 3,969                      | 7,550            | 2,899            | 14,418           | 27.5                   | 52.4        | 20.1        | +28                                                | +5  | 0   | +10.3   | 15,907                   | +1,489                     |
| I9             | 3,487                      | 5,917            | 3,201            | 12,605           | 27.7                   | 46.9        | 25.4        | +8                                                 | +14 | +6  | +10.3   | 13,904                   | +1,299                     |
| H4             | 50,735                     | 19,144           | 6,161            | 76,040           | 66.7                   | 25.2        | 8.1         | +13                                                | +1  | 0   | +8.9    | 82,827                   | +6,787                     |
| H5             | 135,924                    | 63,112           | 21,508           | 220,544          | 61.6                   | 28.6        | 9.8         | +4                                                 | +4  | +3  | +3.9    | 229,151                  | +8,607                     |
| EPO-N          | 209,308                    | 325,252          | 211,984          | 746,544          | 28.0                   | 43.6        | 28.4        | +12                                                | +17 | +10 | +13.6   | 848,152                  | +101,608                   |
| EPO-C          | 853,639                    | 1,230,664        | 799,917          | 2,884,220        | 29.6                   | 42.7        | 27.7        | +17                                                | +22 | +14 | +18.3   | 3,412,073                | +527,853                   |
| EPO-S          | 18,127                     | 91,127           | 217,864          | 327,118          | 5.5                    | 27.9        | 66.6        | +14                                                | +18 | +10 | +12.5   | 367,845                  | +40,727                    |
| <b>Total</b>   | <b>2,775,339</b>           | <b>3,345,758</b> | <b>2,363,186</b> | <b>8,484,283</b> | <b>32.7</b>            | <b>39.4</b> | <b>27.9</b> |                                                    |     |     |         | <b>9,435,358</b>         | <b>+951,075 (+11.2%)</b>   |

\* Rounded to one decimal place; \*\* weighted average of projected changes in reference biomass for SKJ, YFT and BET

**Supplementary Table 8b. Maximum** (i.e., maximum negative/minimum positive) projected percentage changes in biomass (relative to 2011–2020) of skipjack (SKJ), yellowfin (YFT) and bigeye (BET) tuna, and in total biomass, in high-seas areas under RCP4.5 by 2050. Change in tonnes is also shown.

| High-seas area | Reference biomass (tonnes) |                  |                  |                  | Relative abundance (%) |             |             | % change in reference biomass under RCP4.5 in 2050 |     |     |         | Biomass in 2050 (tonnes) | Change in biomass (tonnes) |
|----------------|----------------------------|------------------|------------------|------------------|------------------------|-------------|-------------|----------------------------------------------------|-----|-----|---------|--------------------------|----------------------------|
|                | SKJ                        | YFT              | BET              | TOTAL            | SKJ*                   | YFT*        | BET*        | SKJ                                                | YFT | BET | TOTAL** |                          |                            |
| I1             | 81,609                     | 45,234           | 15,605           | 142,448          | 57.3                   | 31.8        | 11.0        | -28                                                | -2  | -5  | -17.2   | 117,913                  | -24,535                    |
| I2             | 267,205                    | 96,116           | 27,397           | 390,718          | 68.4                   | 24.6        | 7.0         | -22                                                | -10 | -9  | -18.1   | 319,856                  | -70,862                    |
| I3             | 278,796                    | 169,837          | 74,682           | 523,315          | 53.3                   | 32.5        | 14.3        | +19                                                | +4  | -1  | +11.3   | 582,333                  | +59,018                    |
| I4             | 282,157                    | 267,491          | 90,847           | 640,495          | 44.1                   | 41.8        | 14.2        | 0                                                  | -1  | -5  | -1.1    | 633,278                  | -7,217                     |
| I5             | 337,986                    | 331,911          | 149,952          | 819,849          | 41.2                   | 40.5        | 18.3        | -2                                                 | +11 | +1  | +3.8    | 851,099                  | +31,250                    |
| I6             | 218,353                    | 438,615          | 439,387          | 1,096,355        | 19.9                   | 40.0        | 40.1        | -3                                                 | +4  | -6  | -1.4    | 1,080,986                | -15,369                    |
| I7             | 34,044                     | 253,788          | 301,782          | 589,614          | 5.8                    | 43.0        | 51.2        | -9                                                 | +3  | -6  | -2.3    | 576,057                  | -13,557                    |
| I8             | 3,969                      | 7,550            | 2,899            | 14,418           | 27.5                   | 52.4        | 20.1        | +2                                                 | +1  | -4  | +0.3    | 14,457                   | +39                        |
| I9             | 3,487                      | 5,917            | 3,201            | 12,605           | 27.7                   | 46.9        | 25.4        | -7                                                 | +4  | +2  | +0.4    | 12,662                   | +57                        |
| H4             | 50,735                     | 19,144           | 6,161            | 76,040           | 66.7                   | 25.2        | 8.1         | +4                                                 | -2  | -4  | +1.8    | 77,440                   | +1,400                     |
| H5             | 135,924                    | 63,112           | 21,508           | 220,544          | 61.6                   | 28.6        | 9.8         | -1                                                 | +2  | 0   | 0.0     | 220,447                  | -97                        |
| EPO-N          | 209,308                    | 325,252          | 211,984          | 746,544          | 28.0                   | 43.6        | 28.4        | +7                                                 | +10 | +5  | +7.7    | 804,320                  | +57,776                    |
| EPO-C          | 853,639                    | 1,230,664        | 799,917          | 2,884,220        | 29.6                   | 42.7        | 27.7        | +3                                                 | +14 | +7  | +8.8    | 3,138,116                | + 253,896                  |
| EPO-S          | 18,127                     | 91,127           | 217,864          | 327,118          | 5.5                    | 27.9        | 66.6        | +4                                                 | +5  | +5  | +4.9    | 343,293                  | +16,175                    |
| <b>Total</b>   | <b>2,775,339</b>           | <b>3,345,758</b> | <b>2,363,186</b> | <b>8,484,283</b> | <b>32.7</b>            | <b>39.4</b> | <b>27.9</b> |                                                    |     |     |         | <b>8,772,255</b>         | <b>+287,972 (+3.4%)</b>    |

\* Rounded to one decimal place; \*\* weighted average of projected changes in reference biomass for SKJ, YFT and BET

**Supplementary Table 8c. *Minimum*** (i.e., minimum negative/maximum positive) projected percentage changes in biomass (relative to 2011–2020) of skipjack (SKJ), yellowfin (YFT) and bigeye (BET) tuna, and in total biomass, in high-seas areas under RCP4.5 by 2050. Change in tonnes is also shown.

| High-seas area | Reference biomass (tonnes) |                  |                  |                  | Relative abundance (%) |             |             | % change in reference biomass under RCP4.5 in 2050 |     |     |         | Biomass in 2050 (tonnes) | Change in biomass (tonnes) |
|----------------|----------------------------|------------------|------------------|------------------|------------------------|-------------|-------------|----------------------------------------------------|-----|-----|---------|--------------------------|----------------------------|
|                | SKJ                        | YFT              | BET              | TOTAL            | SKJ*                   | YFT*        | BET*        | SKJ                                                | YFT | BET | TOTAL** |                          |                            |
| I1             | 81,609                     | 45,234           | 15,605           | 142,448          | 57.3                   | 31.8        | 11.0        | 0                                                  | +3  | +2  | +1.2    | 144,117                  | +1,669                     |
| I2             | 267,205                    | 96,116           | 27,397           | 390,718          | 68.4                   | 24.6        | 7.0         | 0                                                  | -4  | -2  | -1.1    | 386,325                  | -4,393                     |
| I3             | 278,796                    | 169,837          | 74,682           | 523,315          | 53.3                   | 32.5        | 14.3        | +51                                                | +10 | +7  | +31.4   | 687,712                  | +164,397                   |
| I4             | 282,157                    | 267,491          | 90,847           | 640,495          | 44.1                   | 41.8        | 14.2        | +13                                                | +10 | +3  | +10.3   | 706,650                  | +66,155                    |
| I5             | 337,986                    | 331,911          | 149,952          | 819,849          | 41.2                   | 40.5        | 18.3        | +25                                                | +22 | +10 | +21.0   | 992,361                  | +172,512                   |
| I6             | 218,353                    | 438,615          | 439,387          | 1,096,355        | 19.9                   | 40.0        | 40.1        | +18                                                | +14 | +1  | +9.6    | 1,201,459                | +105,104                   |
| I7             | 34,044                     | 253,788          | 301,782          | 589,614          | 5.8                    | 43.0        | 51.2        | +15                                                | +18 | +8  | +12.7   | 664,545                  | +74,931                    |
| I8             | 3,969                      | 7,550            | 2,899            | 14,418           | 27.5                   | 52.4        | 20.1        | +56                                                | +10 | +3  | +21.3   | 17,483                   | +3,065                     |
| I9             | 3,487                      | 5,917            | 3,201            | 12,605           | 27.7                   | 46.9        | 25.4        | +25                                                | +22 | +11 | +20.0   | 15,131                   | +2,526                     |
| H4             | 50,735                     | 19,144           | 6,161            | 76,040           | 66.7                   | 25.2        | 8.1         | +18                                                | +7  | +4  | +14.1   | 86,759                   | +10,719                    |
| H5             | 135,924                    | 63,112           | 21,508           | 220,544          | 61.6                   | 28.6        | 9.8         | +8                                                 | +8  | +7  | +7.9    | 237,972                  | +17,428                    |
| EPO-N          | 209,308                    | 325,252          | 211,984          | 746,544          | 28.0                   | 43.6        | 28.4        | +16                                                | 26  | +16 | +20.4   | 898,516                  | +151,972                   |
| EPO-C          | 853,639                    | 1,230,664        | 799,917          | 2,884,220        | 29.6                   | 42.7        | 27.7        | +35                                                | +36 | +22 | +31.8   | 3,802,014                | + 917,794                  |
| EPO-S          | 18,127                     | 91,127           | 217,864          | 327,118          | 5.5                    | 27.9        | 66.6        | +27                                                | +37 | +19 | +24.5   | 407,123                  | +80,005                    |
| <b>Total</b>   | <b>2,775,339</b>           | <b>3,345,758</b> | <b>2,363,186</b> | <b>8,484,283</b> | <b>32.7</b>            | <b>39.4</b> | <b>27.9</b> |                                                    |     |     |         | <b>10,248,168</b>        | <b>+1,763,885 (+20.8%)</b> |

\* Rounded to one decimal place; \*\* weighted average of projected changes in reference biomass for SKJ, YFT and BET

**Supplementary Table 9a.** *Average* projected percentage changes in biomass (relative to 2011–2020) of skipjack (SKJ), yellowfin (YFT) and bigeye (BET) tuna, and total biomass, in the exclusive economic zones of other Pacific Small Island Developing States (Other Pacific SIDS) under RCP8.5 by 2050. Change in tonnes is also shown.

| Other Pacific SIDS  | Reference biomass (tonnes) |                |                |                | Relative abundance (%) |             |             | % change in reference biomass under RCP8.5 in 2050 |     |     |        | Biomass in 2050 (tonnes) | Change in biomass (tonnes) |
|---------------------|----------------------------|----------------|----------------|----------------|------------------------|-------------|-------------|----------------------------------------------------|-----|-----|--------|--------------------------|----------------------------|
|                     | SKJ                        | YFT            | BET            | TOTAL          | SKJ*                   | YFT*        | BET*        | SKJ                                                | YFT | BET | TOTAL* |                          |                            |
| American Samoa      | 10,291                     | 21,262         | 9,239          | 40,792         | 25.2                   | 52.1        | 22.6        | +10                                                | +10 | +1  | +8.0   | 44,040                   | +3,248                     |
| Fiji                | 22,430                     | 50,460         | 22,257         | 95,147         | 23.6                   | 53.0        | 23.4        | +10                                                | +2  | -2  | +3.0   | 97,954                   | + 2,807                    |
| French Polynesia    | 109,222                    | 127,431        | 85,269         | 321,922        | 33.9                   | 39.6        | 26.5        | +39                                                | +22 | +8  | +24.1  | 399,375                  | +77,453                    |
| Guam                | 19,096                     | 14,368         | 5,689          | 39,153         | 48.8                   | 36.7        | 14.5        | +17                                                | -1  | +2  | +8.2   | 42,369                   | + 3,216                    |
| New Caledonia       | 18,682                     | 49,159         | 21,226         | 89,067         | 21.0                   | 55.2        | 23.8        | +13                                                | -5  | -4  | -1.0   | 88,189                   | - 878                      |
| Niue                | 2,989                      | 9,692          | 5,579          | 18,260         | 16.4                   | 53.1        | 30.6        | +11                                                | +11 | +3  | +8.6   | 19,822                   | +1,562                     |
| Northern Mariana Is | 61,047                     | 37,202         | 19,499         | 117,748        | 51.8                   | 31.6        | 16.6        | +31                                                | +7  | +2  | +18.6  | 139,667                  | +21,919                    |
| Pitcairn Islands    | 2,055                      | 7,428          | 9,425          | 18,908         | 10.9                   | 39.3        | 49.8        | +29                                                | +33 | +12 | +22.1  | 23,086                   | +4,178                     |
| Samoa               | 1,038                      | 2,433          | 1,000          | 4,471          | 23.2                   | 54.4        | 22.4        | +9                                                 | +8  | 0   | +6.4   | 4,759                    | +288                       |
| Tonga               | 8,420                      | 24,704         | 13,283         | 46,407         | 18.1                   | 53.2        | 28.6        | +8                                                 | +6  | 0   | +4.6   | 48,563                   | + 2,156                    |
| Vanuatu             | 16,478                     | 34,920         | 13,418         | 64,816         | 25.4                   | 53.9        | 20.7        | +23                                                | -2  | -2  | +4.4   | 67,639                   | + 2,823                    |
| Wallis Futuna       | 6,581                      | 13,742         | 5,206          | 25,529         | 25.8                   | 53.8        | 20.4        | +2                                                 | +4  | -1  | +2.5   | 26,158                   | +629                       |
| <b>Total</b>        | <b>278,329</b>             | <b>392,801</b> | <b>211,090</b> | <b>882,220</b> | <b>31.5</b>            | <b>44.5</b> | <b>23.9</b> |                                                    |     |     |        | <b>1,001,621</b>         | <b>+119,401 (13.5%)</b>    |

\* Rounded to one decimal place; \*\* weighted average of projected changes in reference biomass for SKJ, YFT and BET

**Supplementary Table 9b. *Maximum*** (i.e., maximum negative/minimum positive) projected percentage changes in biomass (relative to 2011–2020) of skipjack (SKJ), yellowfin (YFT) and bigeye (BET) tuna, and total biomass, in the exclusive economic zones of other Pacific Small Island Developing States (Other Pacific SIDS) under RCP8.5 by 2050. Change in tonnes is also shown.

| Other Pacific SIDS  | Reference biomass (tonnes) |                |                |                | Relative abundance (%) |             |             | % change in reference biomass under RCP8.5 in 2050 |     |     |         | Biomass in 2050 (tonnes) | Change in biomass (tonnes) |
|---------------------|----------------------------|----------------|----------------|----------------|------------------------|-------------|-------------|----------------------------------------------------|-----|-----|---------|--------------------------|----------------------------|
|                     | SKJ                        | YFT            | BET            | TOTAL          | SKJ*                   | YFT*        | BET*        | SKJ                                                | YFT | BET | TOTAL** |                          |                            |
| American Samoa      | 10,291                     | 21,262         | 9,239          | 40,792         | 25.2                   | 52.1        | 22.6        | -3                                                 | +2  | -2  | -0.2    | 40,724                   | - 68                       |
| Fiji                | 22,430                     | 50,460         | 22,257         | 95,147         | 23.6                   | 53.0        | 23.4        | -7                                                 | -5  | -4  | -5.2    | 90,164                   | -4,983                     |
| French Polynesia    | 109,222                    | 127,431        | 85,269         | 321,922        | 33.9                   | 39.6        | 26.5        | +19                                                | +11 | +3  | +11.6   | 359,250                  | +37,328                    |
| Guam                | 19,096                     | 14,368         | 5,689          | 39,153         | 48.8                   | 36.7        | 14.5        | -2                                                 | -4  | 0   | -2.4    | 38,196                   | -957                       |
| New Caledonia       | 18,682                     | 49,159         | 21,226         | 89,067         | 21.0                   | 55.2        | 23.8        | -6                                                 | -9  | -6  | -7.7    | 82,248                   | -6,819                     |
| Niue                | 2,989                      | 9,692          | 5,579          | 18,260         | 16.4                   | 53.1        | 30.6        | -1                                                 | +2  | 0   | +0.9    | 18,424                   | +164                       |
| Northern Mariana Is | 61,047                     | 37,202         | 19,499         | 117,748        | 51.8                   | 31.6        | 16.6        | +12                                                | +1  | 0   | +6.5    | 125,446                  | +7,698                     |
| Pitcairn Islands    | 2,055                      | 7,428          | 9,425          | 18,908         | 10.9                   | 39.3        | 49.8        | +21                                                | +17 | +7  | +12.5   | 21,262                   | +2,354                     |
| Samoa               | 1,038                      | 2,433          | 1,000          | 4,471          | 23.2                   | 54.4        | 22.4        | -3                                                 | 0   | -3  | -1.4    | 4,410                    | - 61                       |
| Tonga               | 8,420                      | 24,704         | 13,283         | 46,407         | 18.1                   | 53.2        | 28.6        | -4                                                 | -1  | -3  | -2.1    | 45,425                   | -982                       |
| Vanuatu             | 16,478                     | 34,920         | 13,418         | 64,816         | 25.4                   | 53.9        | 20.7        | -5                                                 | -7  | -4  | -5.9    | 61,011                   | -3,805                     |
| Wallis Futuna       | 6,581                      | 13,742         | 5,206          | 25,529         | 25.8                   | 53.8        | 20.4        | -8                                                 | -2  | -4  | -4.0    | 24,519                   | - 1,010                    |
| <b>Total</b>        | <b>278,329</b>             | <b>392,801</b> | <b>211,090</b> | <b>882,220</b> | <b>31.5</b>            | <b>44.5</b> | <b>23.9</b> |                                                    |     |     |         | <b>911,078</b>           | <b>+28,858 (3.3%)</b>      |

\* Rounded to one decimal place; \*\* weighted average of projected changes in reference biomass for SKJ, YFT and BET



**Supplementary Table 9c. *Minimum*** (i.e., minimum negative/maximum positive) projected percentage changes in biomass (relative to 2011–2020) of skipjack (SKJ), yellowfin (YFT) and bigeye (BET) tuna, and total biomass, in the exclusive economic zones of other Pacific Small Island Developing States (Other Pacific SIDS) under RCP8.5 by 2050. Change in tonnes is also shown.

| Other Pacific SIDS  | Reference biomass (tonnes) |                |                |                | Relative abundance (%) |             |             | % change in reference biomass under RCP8.5 in 2050 |     |     |         | Biomass in 2050 (tonnes) | Change in biomass (tonnes) |
|---------------------|----------------------------|----------------|----------------|----------------|------------------------|-------------|-------------|----------------------------------------------------|-----|-----|---------|--------------------------|----------------------------|
|                     | SKJ                        | YFT            | BET            | TOTAL          | SKJ*                   | YFT*        | BET*        | SKJ                                                | YFT | BET | TOTAL** |                          |                            |
| American Samoa      | 10,291                     | 21,262         | 9,239          | 40,792         | 25.2                   | 52.1        | 22.6        | +26                                                | +16 | +6  | +16.3   | 47,424                   | +6,632                     |
| Fiji                | 22,430                     | 50,460         | 22,257         | 95,147         | 23.6                   | 53.0        | 23.4        | +28                                                | +6  | +1  | +10.0   | 104,678                  | +9,531                     |
| French Polynesia    | 109,222                    | 127,431        | 85,269         | 321,922        | 33.9                   | 39.6        | 26.5        | +58                                                | +31 | +13 | +35.4   | 435,859                  | +113,937                   |
| Guam                | 19,096                     | 14,368         | 5,689          | 39,153         | 48.8                   | 36.7        | 14.5        | +45                                                | +2  | +6  | +23.6   | 48,375                   | +9,222                     |
| New Caledonia       | 18,682                     | 49,159         | 21,226         | 89,067         | 21.0                   | 55.2        | 23.8        | +42                                                | -3  | -2  | +6.7    | 95,014                   | +5,947                     |
| Niue                | 2,989                      | 9,692          | 5,579          | 18,260         | 16.4                   | 53.1        | 30.6        | +24                                                | +18 | +7  | +15.6   | 21,112                   | +2,852                     |
| Northern Mariana Is | 61,047                     | 37,202         | 19,499         | 117,748        | 51.8                   | 31.6        | 16.6        | +51                                                | +13 | +4  | +31.2   | 154,498                  | +36,750                    |
| Pitcairn Islands    | 2,055                      | 7,428          | 9,425          | 18,908         | 10.9                   | 39.3        | 49.8        | +41                                                | +44 | +22 | +32.7   | 25,092                   | +6,184                     |
| Samoa               | 1,038                      | 2,433          | 1,000          | 4,471          | 23.2                   | 54.4        | 22.4        | +23                                                | +14 | +5  | +14.1   | 5,100                    | +629                       |
| Tonga               | 8,420                      | 24,704         | 13,283         | 46,407         | 18.1                   | 53.2        | 28.6        | +23                                                | +12 | +4  | +11.7   | 51,839                   | +5,432                     |
| Vanuatu             | 16,478                     | 34,920         | 13,418         | 64,816         | 25.4                   | 53.9        | 20.7        | +50                                                | 0   | 0   | +12.7   | 73,055                   | +8,239                     |
| Wallis Futuna       | 6,581                      | 13,742         | 5,206          | 25,529         | 25.8                   | 53.8        | 20.4        | +19                                                | +10 | +2  | +10.7   | 28,258                   | + 2,729                    |
| <b>Total</b>        | <b>278,329</b>             | <b>392,801</b> | <b>211,090</b> | <b>882,220</b> | <b>31.5</b>            | <b>44.5</b> | <b>23.9</b> |                                                    |     |     |         | <b>1,090,305</b>         | <b>+208,085 (+23.6%)</b>   |

\* Rounded to one decimal place; \*\* weighted average of projected changes in reference biomass for SKJ, YFT and BET

**Supplementary Table 10a.** *Average* projected percentage changes in biomass (relative to 2011–2020) of skipjack (SKJ), yellowfin (YFT) and bigeye (BET) tuna, and total biomass, in exclusive economic zones of other Pacific Small Island Developing States (Other Pacific SIDS) under RCP4.5 by 2050. Change in tonnes is also shown.

| Other Pacific SIDS  | Reference biomass (tonnes) |                |                |                | Relative abundance (%) |             |             | % change in reference biomass under RCP4.5 in 2050 |     |     |         | Biomass in 2050 (tonnes) | Change in biomass (tonnes) |
|---------------------|----------------------------|----------------|----------------|----------------|------------------------|-------------|-------------|----------------------------------------------------|-----|-----|---------|--------------------------|----------------------------|
|                     | SKJ                        | YFT            | BET            | TOTAL          | SKJ*                   | YFT*        | BET*        | SKJ                                                | YFT | BET | TOTAL** |                          |                            |
| American Samoa      | 10,291                     | 21,262         | 9,239          | 40,792         | 25.2                   | 52.1        | 22.6        | -9                                                 | +9  | +1  | +2.6    | 41,872                   | +1,080                     |
| Fiji                | 22,430                     | 50,460         | 22,257         | 95,147         | 23.6                   | 53.0        | 23.4        | +20                                                | +7  | +1  | +8.7    | 103,388                  | + 8,241                    |
| French Polynesia    | 109,222                    | 127,431        | 85,269         | 321,922        | 33.9                   | 39.6        | 26.5        | +6                                                 | +17 | +10 | +11.4   | 358,665                  | 36,743                     |
| Guam                | 19,096                     | 14,368         | 5,689          | 39,153         | 48.8                   | 36.7        | 14.5        | +29                                                | +3  | +4  | +15.8   | 45,349                   | + 6,196                    |
| New Caledonia       | 18,682                     | 49,159         | 21,226         | 89,067         | 21.0                   | 55.2        | 23.8        | +9                                                 | 0   | -3  | +1.2    | 90,112                   | +1,045                     |
| Niue                | 2,989                      | 9,692          | 5,579          | 18,260         | 16.4                   | 53.1        | 30.6        | +2                                                 | +12 | +3  | +7.6    | 19,650                   | + 1,390                    |
| Northern Mariana Is | 61,047                     | 37,202         | 19,499         | 117,748        | 51.8                   | 31.6        | 16.6        | +21                                                | +8  | +2  | +13.7   | 133,934                  | +16,186                    |
| Pitcairn Islands    | 2,055                      | 7,428          | 9,425          | 18,908         | 10.9                   | 39.3        | 49.8        | -10                                                | +16 | +11 | +10.7   | 20,928                   | + 2,020                    |
| Samoa               | 1,038                      | 2,433          | 1,000          | 4,471          | 23.2                   | 54.4        | 22.4        | -5                                                 | +9  | 0   | +3.7    | 4,638                    | +167                       |
| Tonga               | 8,420                      | 24,704         | 13,283         | 46,407         | 18.1                   | 53.2        | 28.6        | +11                                                | +10 | +2  | +7.9    | 50,069                   | +3,662                     |
| Vanuatu             | 16,478                     | 34,920         | 13,418         | 64,816         | 25.4                   | 53.9        | 20.7        | +17                                                | +3  | -1  | +5.7    | 68,531                   | +3,715                     |
| Wallis Futuna       | 6,581                      | 13,742         | 5,206          | 25,529         | 25.8                   | 53.8        | 20.4        | -3                                                 | +7  | -1  | +2.8    | 26,241                   | +712                       |
| <b>Total</b>        | <b>278,329</b>             | <b>392,801</b> | <b>211,090</b> | <b>882,220</b> | <b>31.5</b>            | <b>44.5</b> | <b>23.9</b> |                                                    |     |     |         | <b>963,377</b>           | <b>+81,157 (+9.2%)</b>     |

\* Rounded to one decimal place; \*\* weighted average of projected changes in reference biomass for SKJ, YFT and BET

**Supplementary Table 10b. *Maximum*** (i.e., maximum negative/minimum positive) projected percentage changes in biomass (relative to 2011–2020) of skipjack (SKJ), yellowfin (YFT) and bigeye (BET) tuna, and total biomass, in the exclusive economic zones of other Pacific Small Island Developing States (Other Pacific SIDS) under RCP4.5 by 2050. Change in tonnes is also shown.

| Other Pacific SIDS  | Reference biomass (tonnes) |                |                |                | Relative abundance (%) |             |             | % change in reference biomass under RCP4.5 in 2050 |     |     |         | Biomass in 2050 (tonnes) | Change in biomass (tonnes) |
|---------------------|----------------------------|----------------|----------------|----------------|------------------------|-------------|-------------|----------------------------------------------------|-----|-----|---------|--------------------------|----------------------------|
|                     | SKJ                        | YFT            | BET            | TOTAL          | SKJ*                   | YFT*        | BET*        | SKJ                                                | YFT | BET | TOTAL** |                          |                            |
| American Samoa      | 10,291                     | 21,262         | 9,239          | 40,792         | 25.2                   | 52.1        | 22.6        | -20                                                | +2  | -2  | -4.5    | 38,974                   | -1,818                     |
| Fiji                | 22,430                     | 50,460         | 22,257         | 95,147         | 23.6                   | 53.0        | 23.4        | 0                                                  | +2  | -2  | +0.6    | 95,711                   | +564                       |
| French Polynesia    | 109,222                    | 127,431        | 85,269         | 321,922        | 33.9                   | 39.6        | 26.5        | -12                                                | +7  | +6  | +0.3    | 322,852                  | +930                       |
| Guam                | 19,096                     | 14,368         | 5,689          | 39,153         | 48.8                   | 36.7        | 14.5        | +13                                                | +1  | +1  | +6.9    | 41,836                   | +2,683                     |
| New Caledonia       | 18,682                     | 49,159         | 21,226         | 89,067         | 21.0                   | 55.2        | 23.8        | -4                                                 | -3  | -5  | -3.7    | 85,784                   | -3,283                     |
| Niue                | 2,989                      | 9,692          | 5,579          | 18,260         | 16.4                   | 53.1        | 30.6        | -8                                                 | +4  | 0   | +0.8    | 18,409                   | +149                       |
| Northern Mariana Is | 61,047                     | 37,202         | 19,499         | 117,748        | 51.8                   | 31.6        | 16.6        | +6                                                 | +5  | -2  | +4.4    | 122,881                  | +5,133                     |
| Pitcairn Islands    | 2,055                      | 7,428          | 9,425          | 18,908         | 10.9                   | 39.3        | 49.8        | -18                                                | +3  | +6  | 2.2     | 19,326                   | +418                       |
| Samoa               | 1,038                      | 2,433          | 1,000          | 4,471          | 23.2                   | 54.4        | 22.4        | -14                                                | +2  | -3  | -2.8    | 4,344                    | -127                       |
| Tonga               | 8,420                      | 24,704         | 13,283         | 46,407         | 18.1                   | 53.2        | 28.6        | -2                                                 | +4  | -2  | +1.2    | 46,961                   | +554                       |
| Vanuatu             | 16,478                     | 34,920         | 13,418         | 64,816         | 25.4                   | 53.9        | 20.7        | -2                                                 | -1  | -4  | -1.9    | 63,601                   | -1,215                     |
| Wallis Futuna       | 6,581                      | 13,742         | 5,206          | 25,529         | 25.8                   | 53.8        | 20.4        | -13                                                | +1  | -4  | -3.6    | 24,603                   | -926                       |
| <b>Total</b>        | <b>278,329</b>             | <b>392,801</b> | <b>211,090</b> | <b>882,220</b> | <b>31.5</b>            | <b>44.5</b> | <b>23.9</b> |                                                    |     |     |         | <b>885,281</b>           | <b>+3,061 (+0.3%)</b>      |

\* Rounded to one decimal place; \*\* weighted average of projected changes in reference biomass for SKJ, YFT and BET

**Supplementary Table 10c. *Minimum*** (i.e., minimum negative/maximum positive) projected percentage changes in biomass (relative to 2011–2020) of skipjack (SKJ), yellowfin (YFT) and bigeye (BET) tuna, and total biomass, in the exclusive economic zones of other Pacific Small Island Developing States (Other Pacific SIDS) under RCP4.5 by 2050. Change in tonnes is also shown.

| Other Pacific SIDS  | Reference biomass (tonnes) |                |                |                | Relative abundance (%) |             |             | % change in reference biomass under RCP4.5 in 2050 |     |     |         | Biomass in 2050 (tonnes) | Change in biomass (tonnes) |
|---------------------|----------------------------|----------------|----------------|----------------|------------------------|-------------|-------------|----------------------------------------------------|-----|-----|---------|--------------------------|----------------------------|
|                     | SKJ                        | YFT            | BET            | TOTAL          | SKJ*                   | YFT*        | BET*        | SKJ                                                | YFT | BET | TOTAL** |                          |                            |
| American Samoa      | 10,291                     | 21,262         | 9,239          | 40,792         | 25.2                   | 52.1        | 22.6        | +11                                                | +18 | +6  | +13.5   | 46,306                   | +5,514                     |
| Fiji                | 22,430                     | 50,460         | 22,257         | 95,147         | 23.6                   | 53.0        | 23.4        | +43                                                | +13 | +5  | +18.2   | 112,465                  | +17,318                    |
| French Polynesia    | 109,222                    | 127,431        | 85,269         | 321,922        | 33.9                   | 39.6        | 26.5        | +17                                                | +27 | +16 | +20.7   | 388,539                  | + 66,617                   |
| Guam                | 19,096                     | 14,368         | 5,689          | 39,153         | 48.8                   | 36.7        | 14.5        | +45                                                | +6  | +8  | +25.3   | 49,063                   | + 9,910                    |
| New Caledonia       | 18,682                     | 49,159         | 21,226         | 89,067         | 21.0                   | 55.2        | 23.8        | +29                                                | +3  | 0   | +7.7    | 95,960                   | +6,893                     |
| Niue                | 2,989                      | 9,692          | 5,579          | 18,260         | 16.4                   | 53.1        | 30.6        | +16                                                | +19 | +8  | +15.1   | 21,026                   | +2,766                     |
| Northern Mariana Is | 61,047                     | 37,202         | 19,499         | 117,748        | 51.8                   | 31.6        | 16.6        | +39                                                | +11 | +5  | +24.5   | 146,624                  | +28,876                    |
| Pitcairn Islands    | 2,055                      | 7,428          | 9,425          | 18,908         | 10.9                   | 39.3        | 49.8        | 0                                                  | +30 | +20 | +21.8   | 23,021                   | +4,113                     |
| Samoa               | 1,038                      | 2,433          | 1,000          | 4,471          | 23.2                   | 54.4        | 22.4        | +12                                                | +17 | +5  | +13.2   | 5,059                    | +588                       |
| Tonga               | 8,420                      | 24,704         | 13,283         | 46,407         | 18.1                   | 53.2        | 28.6        | +29                                                | +17 | +6  | +16.0   | 53,845                   | +7,438                     |
| Vanuatu             | 16,478                     | 34,920         | 13,418         | 64,816         | 25.4                   | 53.9        | 20.7        | +41                                                | +7  | +3  | +14.8   | 74,419                   | +9,603                     |
| Wallis Futuna       | 6,581                      | 13,742         | 5,206          | 25,529         | 25.8                   | 53.8        | 20.4        | +14                                                | +15 | +4  | +12.5   | 28,720                   | +3,191                     |
| <b>Total</b>        | <b>278,329</b>             | <b>392,801</b> | <b>211,090</b> | <b>882,220</b> | <b>31.5</b>            | <b>44.5</b> | <b>23.9</b> |                                                    |     |     |         | <b>1,045,047</b>         | <b>+162,827 (+18.5%)</b>   |

\* Rounded to one decimal place; \*\* weighted average of projected changes in reference biomass for SKJ, YFT and BET

**Supplementary Table 11a.** Projected *average* changes in catches of skipjack (SKJ), yellowfin (YFT) and bigeye (BET) tuna in tonnes (t) caught by purse-seine fishing in the exclusive economic zones (EEZs) of 10 Pacific Island Small Developing States by 2050 under the IPCC RCP8.5 emissions scenario, relative to average catches for the 10-year period 2009–2018, based on the projected changes in biomass of each tuna species in Supplementary Table 17a. Changes in the total catch from all EEZs for each species, and for all species from all EEZs, are also shown. All values except ‘Change (%)’ for totals for EEZs and for all species combined are rounded to nearest whole number.

| Species              | Catch         | EEZ          |         |          |         |        |                  |         |       |          |                 |         | Total   |           |
|----------------------|---------------|--------------|---------|----------|---------|--------|------------------|---------|-------|----------|-----------------|---------|---------|-----------|
|                      |               | Cook Islands | FSM     | Kiribati |         |        | Marshall Islands | Nauru   | Palau | PNG      | Solomon Islands | Tokelau |         | Tuvalu    |
|                      |               |              |         | Gilbert  | Phoenix | Line   |                  |         |       |          |                 |         |         |           |
| SKJ                  | Average catch | 9,513        | 144,272 | 203,548  | 79,976  | 32,089 | 29,990           | 86,174  | 1,681 | 318,229  | 84,637          | 19,037  | 63,863  | 1,073,008 |
|                      | 2050 catch    | 8,942        | 124,074 | 175,051  | 78,376  | 36,581 | 30,289           | 65,492  | 1,681 | 184,573  | 57,553          | 15,610  | 47,259  | 825,482   |
|                      | Change (t)    | -571         | -20,198 | -28,497  | -1,600  | +4,492 | +300             | -20,682 | 0     | -133,656 | -27,084         | -3,427  | -16,604 | -247,526  |
|                      | Change (%)    | -6           | -14     | -14      | -2      | +14    | +1               | -24     | 0     | -42      | -32             | -18     | -26     | -23.1     |
| YFT                  | Average catch | 1,107        | 29,317  | 45,981   | 11,051  | 5,667  | 5,435            | 19,952  | 942   | 130,049  | 29,178          | 1,661   | 6,944   | 287,285   |
|                      | 2050 catch    | 1,229        | 26,386  | 40,003   | 10,277  | 6,064  | 4,891            | 16,959  | 932   | 111,842  | 25,969          | 1,678   | 6,597   | 252,827   |
|                      | Change (t)    | +122         | -2,932  | -5,978   | -774    | +397   | -543             | -2,993  | -9    | -18,207  | -3,210          | +17     | -347    | -34,457   |
|                      | Change (%)    | +11          | -10     | -13      | -7      | +7     | -10              | -15     | -1    | -14      | -11             | 1       | -5      | -12.0     |
| BET                  | Average catch | 460          | 4,998   | 10,544   | 3,670   | 3,523  | 1,578            | 4,667   | 33    | 12,754   | 3,061           | 693     | 2,273   | 48,256    |
|                      | 2050 catch    | 469          | 4,948   | 10,123   | 3,486   | 3,558  | 1,547            | 4,434   | 33    | 11,989   | 2,877           | 666     | 2,137   | 46,267    |
|                      | Change (t)    | +9           | -50     | -422     | -183    | +35    | -32              | -233    | 0     | -765     | -184            | -28     | -136    | -1,988    |
|                      | Change (%)    | +2           | -1      | -4       | -5      | +1     | -2               | -5      | +1    | -6       | -6              | -4      | -6      | -4.1      |
| All species combined | Average catch | 11,080       | 178,587 | 260,073  | 94,696  | 41,279 | 37,003           | 110,794 | 2,655 | 461,032  | 116,877         | 21,392  | 73,080  | 1,408,548 |
|                      | 2050 catch    | 10,640       | 155,407 | 225,177  | 92,140  | 46,203 | 36,728           | 86,886  | 2,646 | 308,404  | 86,399          | 17,954  | 55,992  | 1,124,577 |
|                      | Change (t)    | -440         | -23,180 | -34,896  | -2,557  | +4,924 | -275             | -23,908 | -9    | -152,628 | -30,477         | -3,438  | -17,088 | -283,971  |
|                      | Change (%)    | -4.0         | -13.0   | -13.4    | -2.7    | +11.9  | -0.7             | -21.6   | -0.3  | -33.1    | -26.1           | -16.1   | -23.4   | -20.2     |

**Supplementary Table 11b.** Projected *maximum* (i.e., maximum negative/minimum positive) changes in catches of skipjack (SKJ), yellowfin (YFT) and bigeye (BET) tuna in tonnes (t) caught by purse-seine fishing in the exclusive economic zones (EEZs) of 10 Pacific Island Small Developing States by 2050 under the IPCC RCP8.5 emissions scenario, relative to average catches for the 10-year period 2009–2018, based on the projected changes in biomass of each tuna species in Supplementary Table 17b. Changes in the total catch from all EEZs for each species, and for all species from all EEZs, are also shown. All values except ‘Change (%)’ for totals for EEZs and for all species combined are rounded to nearest whole number.

| Species              | Catch         | EEZ          |         |          |         |        |                  |         |       |          |                 |         | Total   |           |
|----------------------|---------------|--------------|---------|----------|---------|--------|------------------|---------|-------|----------|-----------------|---------|---------|-----------|
|                      |               | Cook Islands | FSM     | Kiribati |         |        | Marshall Islands | Nauru   | Palau | PNG      | Solomon Islands | Tokelau |         | Tuvalu    |
|                      |               |              |         | Gilbert  | Phoenix | Line   |                  |         |       |          |                 |         |         |           |
| SKJ                  | Average catch | 9,513        | 144,272 | 203,548  | 79,976  | 32,089 | 29,990           | 86,174  | 1,681 | 318,229  | 84,637          | 19,037  | 63,863  | 1,073,008 |
|                      | 2050 catch    | 8,562        | 109,647 | 144,519  | 69,579  | 34,977 | 27,590           | 49,119  | 1,479 | 146,385  | 45,704          | 14,849  | 41,511  | 693,921   |
|                      | Change (t)    | -951         | -34,625 | -59,029  | -10,397 | +2,888 | -2,399           | -37,055 | -202  | -171,844 | -38,933         | -4,188  | -22,352 | -379,087  |
|                      | Change (%)    | -10          | -24     | -29      | -13     | +9     | -8               | -43     | -12   | -54      | -46             | -22     | -35     | -35.3     |
| YFT                  | Average catch | 1,107        | 29,317  | 45,981   | 11,051  | 5,667  | 5,435            | 19,952  | 942   | 130,049  | 29,178          | 1,661   | 6,944   | 287,285   |
|                      | 2050 catch    | 1,140        | 25,506  | 39,084   | 10,056  | 5,781  | 4,728            | 16,161  | 894   | 104,039  | 25,385          | 1,578   | 6,319   | 240,673   |
|                      | Change (t)    | +33          | -3,811  | -6,897   | -995    | +113   | -707             | -3,791  | -47   | -26,010  | -3,793          | -83     | -625    | -46,612   |
|                      | Change (%)    | +3           | -13     | -15      | -9      | +2     | -13              | -19     | -5    | -20      | -13             | -5      | -9      | -16.2     |
| BET                  | Average catch | 460          | 4,998   | 10,544   | 3,670   | 3,523  | 1,578            | 4,667   | 33    | 12,754   | 3,061           | 693     | 2,273   | 48,256    |
|                      | 2050 catch    | 455          | 4,798   | 10,017   | 3,450   | 3,488  | 1,484            | 4,434   | 33    | 11,861   | 2,816           | 645     | 2,091   | 45,572    |
|                      | Change (t)    | -5           | -200    | -527     | -220    | -35    | -95              | -233    | 0     | -893     | -245            | -49     | -182    | -2,684    |
|                      | Change (%)    | -1           | -4      | -5       | -6      | -1     | -6               | -5      | -1    | -7       | -8              | -7      | -8      | -5.6      |
| All species combined | Average catch | 11,080       | 178,587 | 260,073  | 94,696  | 41,279 | 37,003           | 110,794 | 2,655 | 461,032  | 116,877         | 21,392  | 73,080  | 1,408,548 |
|                      | 2050 catch    | 10,157       | 139,951 | 193,620  | 83,085  | 44,245 | 33,802           | 69,714  | 2,406 | 262,286  | 73,905          | 17,072  | 49,922  | 980,165   |
|                      | Change (t)    | -923         | -38,636 | -66,453  | -11,612 | +2,966 | -3,200           | -41,079 | -249  | -198,746 | -42,971         | -4,320  | -23,159 | -428,383  |
|                      | Change (%)    | -8.3         | -21.6   | -25.6    | -12.3   | +7.2   | -8.6             | -37.1   | -9.4  | -43.1    | -36.8           | -20.2   | -31.7   | -30.4     |

**Supplementary Table 11c.** Projected *minimum* (i.e., minimum negative/maximum positive) changes in catches of skipjack (SKJ), yellowfin (YFT) and bigeye (BET) tuna in tonnes (t) caught by purse-seine fishing in the exclusive economic zones (EEZs) of 10 Pacific Island Small Developing States by 2050 under the IPCC RCP8.5 emissions scenario, relative to average catches for the 10-year period 2009–2018, based on the projected changes in biomass of each tuna species in Supplementary Table 17c. Changes in the total catch from all EEZs for each species, and for all species from all EEZs, are also shown. All values except ‘Change (%)’ for totals for EEZs and for all species combined are rounded to nearest whole number.

| Species              | Catch         | EEZ          |         |          |         |        |                  |         |       |          |                 |         | Total   |           |
|----------------------|---------------|--------------|---------|----------|---------|--------|------------------|---------|-------|----------|-----------------|---------|---------|-----------|
|                      |               | Cook Islands | FSM     | Kiribati |         |        | Marshall Islands | Nauru   | Palau | PNG      | Solomon Islands | Tokelau |         | Tuvalu    |
|                      |               |              |         | Gilbert  | Phoenix | Line   |                  |         |       |          |                 |         |         |           |
| SKJ                  | Average catch | 9,513        | 144,272 | 203,548  | 79,976  | 32,089 | 29,990           | 86,174  | 1,681 | 318,229  | 84,637          | 19,037  | 63,863  | 1,073,008 |
|                      | 2050 catch    | 9,418        | 137,058 | 201,513  | 83,974  | 38,506 | 32,389           | 81,865  | 2,000 | 229,125  | 66,863          | 17,895  | 53,645  | 954,252   |
|                      | Change (t)    | -95          | -7,214  | -2,035   | +3,999  | +6,418 | + 2,399          | -4,309  | +319  | -89,104  | -17,774         | -1,142  | -10,218 | -118,756  |
|                      | Change (%)    | -1           | -5      | -1       | +5      | +20    | +8               | -5      | 19    | -28      | -21             | -6      | -16     | -11.1     |
| YFT                  | Average catch | 1,107        | 29,317  | 45,981   | 11,051  | 5,667  | 5,435            | 19,952  | 942   | 130,049  | 29,178          | 1,661   | 6,944   | 287,285   |
|                      | 2050 catch    | 1,306        | 27,265  | 41,383   | 10,498  | 6,404  | 5,000            | 17,757  | 951   | 118,344  | 26,844          | 1,761   | 6,805   | 264,320   |
|                      | Change (t)    | +199         | -2,052  | -4,598   | -553    | +737   | -435             | -2,195  | +9    | -11,704  | -2,334          | +100    | -139    | -22,965   |
|                      | Change (%)    | +18          | -7      | -10      | -5      | +13    | -8               | -11     | +1    | -9       | -8              | 6       | -2      | -8.0      |
| BET                  | Average catch | 460          | 4,998   | 10,544   | 3,670   | 3,523  | 1,578            | 4,667   | 33    | 12,754   | 3,061           | 693     | 2,273   | 48,256    |
|                      | 2050 catch    | 492          | 5,148   | 10,228   | 3,523   | 3,629  | 1,594            | 4,481   | 35    | 12,116   | 2,908           | 686     | 2,182   | 47,022    |
|                      | Change (t)    | +32          | +150    | -316     | -147    | +106   | +16              | -187    | +2    | -638     | -153            | -7      | -91     | -1,233    |
|                      | Change (%)    | +7           | +3      | -3       | -4      | +3     | +1               | -4      | +5    | -5       | -5              | -1      | -4      | -2.6      |
| All species combined | Average catch | 11,080       | 178,587 | 260,073  | 94,696  | 41,279 | 37,003           | 110,794 | 2,655 | 461,032  | 116,877         | 21,392  | 73,080  | 1,408,548 |
|                      | 2050 catch    | 11,216       | 169,471 | 253,123  | 97,996  | 48,539 | 38,983           | 104,103 | 2,986 | 359,586  | 96,615          | 20,342  | 62,633  | 1,265,594 |
|                      | Change (t)    | +136         | -9,116  | -6,950   | +3,299  | +7,260 | +1,980           | -6,690  | +330  | -101,446 | -20,261         | -1,049  | -10,448 | -142,954  |
|                      | Change (%)    | +1.2         | -5.1    | -2.7     | +3.5    | +17.6  | +5.4             | -6.0    | +12.4 | -22.0    | -17.3           | -4.9    | -14.3   | -10.1     |

**Supplementary Table 12a.** Projected *average* changes in catches of skipjack (SKJ), yellowfin (YFT) and bigeye (BET) tuna in tonnes (t) caught by purse-seine fishing in the high-seas areas (Supplementary Figure 1) by 2050 under the IPCC RCP8.5 emissions scenario, relative to average catches for the 10-year period 2009–2018, based on the projected changes in biomass of each tuna species in Supplementary Table 17a. Changes in the total catch from all high-seas areas for each species, and for all species from all high-seas areas, are also shown.

| Species              | Catch         | High-seas area |        |       |        |        |        |      |      |       |        |        |         |          |        | Total           |
|----------------------|---------------|----------------|--------|-------|--------|--------|--------|------|------|-------|--------|--------|---------|----------|--------|-----------------|
|                      |               | I1             | I2     | I3    | I4     | I5     | I6     | I7   | I8   | I9    | H4     | H5     | EPO-N   | EPO-C    | EPO-S  |                 |
| SKJ                  | Average catch | 10,528         | 18,630 | 45    | 16,516 | 16,994 | 15,459 | 13   | 2    | 24    | 18,431 | 39,150 | 7,072   | 254,602  | 2,031  | <b>399,495</b>  |
|                      | 2050 catch    | 6,948          | 12,482 | 58    | 17,011 | 21,412 | 16,078 | 14   | 2    | 31    | 15,482 | 42,281 | 7,921   | 336,075  | 2,763  | <b>478,558</b>  |
|                      | Change (t)    | -3,580         | -6,148 | +13   | +495   | +4,418 | +618   | +1   | 0    | +7    | -2,949 | +3,132 | +849    | +81,473  | +731   | <b>+79,062</b>  |
|                      | Change (%)    | -34            | -33    | +29   | +3     | +26    | +4     | +10  | +23  | +29   | -16    | +8     | +12     | +32      | +36    | <b>+19.8</b>    |
| YFT                  | Average catch | 4,215          | 3,647  | 1     | 3,199  | 3,530  | 507    | 3    | 1    | 6     | 1,936  | 5,542  | 77,092  | 147,743  | 540    | <b>247,960</b>  |
|                      | 2050 catch    | 3,878          | 3,172  | 1     | 3,103  | 3,848  | 552    | 3    | 1    | 7     | 1,820  | 5,431  | 92,510  | 186,156  | 761    | <b>301,243</b>  |
|                      | Change (t)    | -337           | -474   | 0     | -96    | +318   | +46    | 0    | 0    | +1    | -116   | -111   | +15,418 | +38,413  | +221   | <b>+53,283</b>  |
|                      | Change (%)    | -8             | -13    | +3    | -3     | +9     | +9     | +9   | 0    | +18   | -6     | -2     | +20     | +26      | +41    | <b>+21.5</b>    |
| BET                  | Average catch | 588            | 807    | 1     | 1,728  | 2,707  | 245    | 1    | 0    | 3     | 526    | 1,826  | 11      | 55,319   | 722    | <b>64,483</b>   |
|                      | 2050 catch    | 570            | 758    | 1     | 1,659  | 2,761  | 238    | 1    | 0    | 3     | 494    | 1,789  | 13      | 60,851   | 816    | <b>69,954</b>   |
|                      | Change (t)    | -18            | -48    | 0     | -69    | +54    | -7     | 0    | 0    | 0     | -32    | -37    | +1      | +5,532   | +94    | <b>+5,471</b>   |
|                      | Change (%)    | -3             | -6     | +2    | -4     | +2     | -3     | -2   | -2   | +4    | -6     | -2     | +11     | +10      | +13    | <b>+8.5</b>     |
| All species combined | Average catch | 15,330         | 23,083 | 47    | 21,443 | 23,231 | 16,211 | 17   | 2.2  | 33    | 20,893 | 46,517 | 84,175  | 457,664  | 3,293  | <b>711,939</b>  |
|                      | 2050 catch    | 11,396         | 16,413 | 60    | 21,773 | 28,021 | 16,868 | 18   | 2.5  | 41    | 17,796 | 49,502 | 100,443 | 583,082  | 4,339  | <b>849,755</b>  |
|                      | Change (t)    | -3,934         | -6,670 | +13   | +330   | +4,790 | +657   | +1   | +0.3 | +8    | -3,097 | +2,985 | +16,268 | +125,418 | +1,046 | <b>+137,816</b> |
|                      | Change (%)    | -25.7          | -28.9  | +27.8 | +1.5   | +20.6  | +4.1   | +9.0 | 15.5 | +24.7 | -14.8  | +6.4   | +19.3   | +27.4    | +31.8  | <b>+19.4</b>    |

All values except 'Change (%)' for totals for high-seas areas and for all species combined are rounded to nearest whole number.



**Supplementary Table 12b.** Projected *maximum* (i.e., maximum negative, minimum positive) changes in catches of skipjack (SKJ), yellowfin (YFT) and bigeye (BET) tuna in tonnes (t) caught by purse-seine fishing in the high-seas areas (Supplementary Figure 1) by 2050 under the IPCC RCP8.5 emissions scenario, relative to average catches for the 10-year period 2009–2018, based on the projected changes in biomass of each tuna species in Supplementary Table 17b. Changes in the total catch from all high-seas areas for each species, and for all species from all high-seas areas, are also shown. All values except ‘Change (%)’ for totals for high-seas areas and for all species combined are rounded to nearest whole number.

| Species              | Catch         | High-seas area |        |      |        |        |        |    |      |       |        |        |         |         |       | Total   |
|----------------------|---------------|----------------|--------|------|--------|--------|--------|----|------|-------|--------|--------|---------|---------|-------|---------|
|                      |               | I1             | I2     | I3   | I4     | I5     | I6     | I7 | I8   | I9    | H4     | H5     | EPO-N   | EPO-C   | EPO-S |         |
| SKJ                  | Average catch | 10,528         | 18,630 | 45   | 16,516 | 16,994 | 15,459 | 13 | 2    | 24    | 18,431 | 39,150 | 7,072   | 254,602 | 2,031 | 399,495 |
|                      | 2050 catch    | 5,264          | 9,129  | 49   | 15,360 | 19,203 | 13,913 | 13 | 1    | 29    | 13,639 | 39,150 | 7,213   | 295,338 | 2,499 | 420,799 |
|                      | Change (t)    | -5,264         | -9,501 | +4   | -1,156 | +2,209 | -1,546 | 0  | 0    | +5    | -4,792 | 0      | +141    | +40,736 | +467  | +21,304 |
|                      | Change (%)    | -50            | -51    | +9   | -7     | +13    | -10    | +1 | -7   | +19   | -26    | 0      | +2      | +16     | +23   | +5.3    |
| YFT                  | Average catch | 4,215          | 3,647  | 1    | 3,199  | 3,530  | 507    | 3  | 1    | 6     | 1,936  | 5,542  | 77,092  | 147,743 | 540   | 247,960 |
|                      | 2050 catch    | 3,709          | 3,063  | 1    | 2,975  | 3,636  | 522    | 3  | 0    | 7     | 1,742  | 5,210  | 87,885  | 172,859 | 674   | 282,286 |
|                      | Change (t)    | -506           | -583   | 0    | -224   | +106   | +15    | 0  | 0    | +1    | -194   | -333   | +10,793 | +25,116 | +135  | +34,326 |
|                      | Change (%)    | -12            | -16    | -1   | -7     | +3     | +3     | +2 | -5   | +7    | -10    | -6     | +14     | +17     | +25   | +13.8   |
| BET                  | Average catch | 588            | 807    | 1    | 1,728  | 2,707  | 245    | 1  | 0    | 3     | 526    | 1,826  | 11      | 55,319  | 722   | 64,483  |
|                      | 2050 catch    | 552            | 742    | 1    | 1,624  | 2,653  | 230    | 1  | 0    | 3     | 489    | 1,753  | 12      | 58,085  | 765   | 66,911  |
|                      | Change (t)    | -35            | -65    | 0    | -104   | -54    | -15    | 0  | 0    | 0     | -37    | -73    | +1      | +2,766  | +43   | +2,428  |
|                      | Change (%)    | -6             | -8     | 0    | -6     | -2     | -6     | -6 | -4   | +1    | -7     | -4     | +6      | +5      | +6    | +3.8    |
| All species combined | Average catch | 15,330         | 23,083 | 47   | 21,443 | 23,231 | 16,211 | 17 | 2.2  | 33    | 20,893 | 46,517 | 84,175  | 457,664 | 3,293 | 711,939 |
|                      | 2050 catch    | 9,525          | 12,934 | 51   | 19,959 | 25,492 | 14,666 | 17 | 2.1  | 38    | 15,870 | 46,112 | 95,110  | 526,283 | 3,938 | 769,996 |
|                      | Change (t)    | -5,805         | 10,149 | +4   | -1,484 | +2,261 | -1,545 | 0  | -0.1 | +5    | -5,022 | -406   | +10,935 | +68,619 | +645  | +58,058 |
|                      | Change (%)    | -37.9          | -44.0  | +8.6 | -6.9   | +9.7   | -9.5   | 0  | -6.3 | +15.1 | -24.0  | -0.9   | +13.0   | +15.0   | +19.6 | +8.2    |

**Supplementary Table 12c.** Projected *minimum* (i.e., minimum negative/maximum positive) changes in catches of skipjack (SKJ), yellowfin (YFT) and bigeye (BET) tuna in tonnes (t) caught by purse-seine fishing in the high-seas areas (Supplementary Figure 1) by 2050 under the IPCC RCP8.5 emissions scenario, relative to average catches for the 10-year period 2009–2018, based on the projected changes in biomass of each tuna species in Supplementary Table 17c. Changes in the total catch from all high-seas areas for each species, and for all species from all high-seas areas, are also shown. All values except ‘Change (%)’ for totals for high-seas areas and for all species combined are rounded to nearest whole number.

| Species              | Catch         | High-seas area |        |       |        |        |        |       |       |       |        |        |         |          |        | Total    |
|----------------------|---------------|----------------|--------|-------|--------|--------|--------|-------|-------|-------|--------|--------|---------|----------|--------|----------|
|                      |               | I1             | I2     | I3    | I4     | I5     | I6     | I7    | I8    | I9    | H4     | H5     | EPO-N   | EPO-C    | EPO-S  |          |
| SKJ                  | Average catch | 10,528         | 18,630 | 45    | 16,516 | 16,994 | 15,459 | 13    | 2     | 24    | 18,431 | 39,150 | 7,072   | 254,602  | 2,031  | 399,495  |
|                      | 2050 catch    | 8,949          | 15,463 | 66    | 18,002 | 23,961 | 17,933 | 17    | 2     | 36    | 16,772 | 43,847 | 8,416   | 364,081  | 3,006  | 520,551  |
|                      | Change (t)    | -1,579         | -3,167 | +21   | +1,486 | +6,967 | +2,473 | +4    | 0     | +12   | -1,659 | +4,698 | +1,344  | +109,479 | +975   | +121,055 |
|                      | Change (%)    | -15            | -17    | +47   | +9     | +41    | +16    | +30   | +48   | +48   | -9     | +12    | +19     | +43      | +48    | +30.3    |
| YFT                  | Average catch | 4,215          | 3,647  | 1     | 3,199  | 3,530  | 507    | 3     | 1     | 6     | 1,936  | 5,542  | 77,092  | 147,743  | 540    | 247,960  |
|                      | 2050 catch    | 4,088          | 3,282  | 1     | 3,295  | 4,236  | 593    | 3     | 1     | 8     | 1,859  | 5,598  | 96,365  | 199,453  | 879    | 319,660  |
|                      | Change (t)    | -126           | -365   | 0     | +96    | +706   | +86    | 0     | 0     | +2    | -77    | +55    | +19,273 | +51,710  | +340   | +71,700  |
|                      | Change (%)    | -3             | -10    | +7    | +3     | +20    | +17    | +18   | +4    | +27   | -4     | +1     | +25     | +35      | +63    | +28.9    |
| BET                  | Average catch | 588            | 807    | 1     | 1,728  | 2,707  | 245    | 1     | 0     | 3     | 526    | 1,826  | 11      | 55,319   | 722    | 64,483   |
|                      | 2050 catch    | 582            | 766    | 1     | 1,711  | 2,815  | 248    | 1     | 0     | 3     | 505    | 1,807  | 13      | 63,064   | 895    | 72,411   |
|                      | Change (t)    | -6             | -40    | 0     | -17    | +108   | +2     | 0     | 0     | 0     | -21    | -18    | +2      | +7,745   | +173   | +7,928   |
|                      | Change (%)    | -1             | -5     | +5    | -1     | +4     | +1     | +6    | 0     | +9    | -4     | -1     | +18     | +14      | +24    | +12.3    |
| All species combined | Average catch | 15,330         | 23,083 | 47    | 21,443 | 23,231 | 16,211 | 17    | 2     | 33    | 20,893 | 46,517 | 84,175  | 457,664  | 3,293  | 711,939  |
|                      | 2050 catch    | 13,619         | 19,511 | 69    | 23,008 | 31,012 | 18,773 | 21    | 3     | 47    | 19,135 | 51,252 | 104,794 | 626,598  | 4,781  | 912,622  |
|                      | Change (t)    | -1,712         | -3,572 | +21   | +1,565 | +7,782 | +2,562 | +4    | +1    | +13   | -1,757 | +4,735 | +20,619 | +168,934 | +1,488 | +200,684 |
|                      | Change (%)    | -11.2          | -15.5  | +45.2 | +7.3   | +33.5  | +15.8  | +26.3 | +33.6 | +40.6 | -8.4   | +10.2  | +24.5   | +36.9    | +45.2  | +28.2    |

**Supplementary Table 13a.** Projected *average* changes in catches of skipjack (SKJ), yellowfin (YFT) and bigeye (BET) tuna in tonnes (t) caught by purse-seine fishing in the exclusive economic zones (EEZs) of 10 Pacific Island Small Developing States by 2050 under the IPCC RCP4.5 emissions scenario, relative to average catches for the 10-year period 2009–2018, based on the projected changes in biomass of each tuna species in Supplementary Table 18a. Changes in the total catch from all EEZs for each species, and for all species from all EEZs, are also shown. All values except ‘Change (%)’ for totals for EEZs and for all species combined are rounded to nearest whole number.

| Species              | Catch         | EEZ          |         |          |         |        |                  |         |       |         |                 |         | Total  |           |
|----------------------|---------------|--------------|---------|----------|---------|--------|------------------|---------|-------|---------|-----------------|---------|--------|-----------|
|                      |               | Cook Islands | FSM     | Kiribati |         |        | Marshall Islands | Nauru   | Palau | PNG     | Solomon Islands | Tokelau |        | Tuvalu    |
|                      |               |              |         | Gilbert  | Phoenix | Line   |                  |         |       |         |                 |         |        |           |
| SKJ                  | Average catch | 9,513        | 144,272 | 203,548  | 79,976  | 32,089 | 29,990           | 86,174  | 1,681 | 318,229 | 84,637          | 19,037  | 63,863 | 1,073,009 |
|                      | 2050 catch    | 10,369       | 139,944 | 223,903  | 86,374  | 34,014 | 30,889           | 93,930  | 1,714 | 257,766 | 76,174          | 20,179  | 66,418 | 1,041,673 |
|                      | Change (t)    | +856         | -4,328  | +20,355  | +6,398  | +1,925 | +900             | +7,756  | +34   | -60,464 | -8,464          | +1,142  | +2,555 | -31,335   |
|                      | Change (%)    | +9           | -3      | +10      | +8      | +6     | +3               | +9      | +2    | -19     | -10             | +6      | +4     | -2.9      |
| YFT                  | Average catch | 1,107        | 29,317  | 45,981   | 11,051  | 5,667  | 5,435            | 19,952  | 942   | 130,049 | 29,178          | 1,661   | 6,944  | 287,284   |
|                      | 2050 catch    | 1,218        | 28,731  | 43,682   | 11,051  | 6,347  | 5,326            | 18,555  | 989   | 119,645 | 27,719          | 1,745   | 6,944  | 271,952   |
|                      | Change (t)    | +111         | -586    | -2,299   | 0       | +680   | -109             | -1,397  | +47   | -10,404 | -1,459          | +83     | 0      | -15,333   |
|                      | Change (%)    | +10          | -2      | -5       | 0       | +12    | -2               | -7      | +5    | -8      | -5              | +5      | 0      | -5.3      |
| BET                  | Average catch | 460          | 4,998   | 10,544   | 3,670   | 3,523  | 1,578            | 4,667   | 33    | 12,754  | 3,061           | 693     | 2,273  | 48,256    |
|                      | 2050 catch    | 478          | 5,098   | 10,439   | 3,707   | 3,734  | 1,563            | 4,574   | 35    | 12,244  | 2,847           | 686     | 2,228  | 47,632    |
|                      | Change (t)    | +18          | +100    | -105     | +37     | +211   | -16              | -93     | +2    | -510    | -214            | -7      | -45    | -623      |
|                      | Change (%)    | +4           | +2      | -1       | +1      | +6     | -1               | -2      | +5    | -4      | -7              | -1      | -2     | -4.0      |
| All species combined | Average catch | 11,080       | 178,587 | 260,073  | 94,697  | 41,279 | 37,003           | 110,794 | 2,655 | 461,032 | 116,877         | 21,392  | 73,080 | 1,408,549 |
|                      | 2050 catch    | 12,065       | 173,773 | 278,023  | 101,132 | 44,096 | 37,778           | 117,059 | 2,738 | 389,654 | 106,740         | 22,610  | 75,589 | 1,361,257 |
|                      | Change (t)    | +985         | -4,815  | +17,950  | +6,435  | +2,817 | +775             | +6,266  | +82   | -71,378 | -10,137         | +1,218  | +2,509 | -47,291   |
|                      | Change (%)    | +8.9         | -2.7    | +6.9     | +6.8    | +6.8   | +2.1             | +5.7    | +3.1  | -15.5   | -8.7            | +5.7    | +3.4   | -3.4      |

**Supplementary Table 13b.** Projected *maximum* (i.e., maximum negative, minimum positive) changes in catches of skipjack (SKJ), yellowfin (YFT) and bigeye (BET) tuna in tonnes (t) caught by purse-seine fishing in the exclusive economic zones (EEZs) of 10 Pacific Island Small Developing States by 2050 under the IPCC RCP4.5 emissions scenario, relative to average catches for the 10-year period 2009–2018, based on the projected changes in biomass of each tuna species in Supplementary Table 18b. Changes in the total catch from all EEZs for each species, and for all species from all EEZs, are also shown. All values except ‘Change (%)’ for totals for EEZs and for all species combined are rounded to nearest whole number.

| Species              | Catch         | EEZ          |         |          |         |        |                  |         |       |          |                 |         | Total  |           |
|----------------------|---------------|--------------|---------|----------|---------|--------|------------------|---------|-------|----------|-----------------|---------|--------|-----------|
|                      |               | Cook Islands | FSM     | Kiribati |         |        | Marshall Islands | Nauru   | Palau | PNG      | Solomon Islands | Tokelau |        | Tuvalu    |
|                      |               |              |         | Gilbert  | Phoenix | Line   |                  |         |       |          |                 |         |        |           |
| SKJ                  | Average catch | 9,513        | 144,272 | 203,548  | 79,976  | 32,089 | 29,990           | 86,174  | 1,681 | 318,229  | 84,637          | 19,037  | 63,863 | 1,073,009 |
|                      | 2050 catch    | 8,657        | 128,402 | 201,513  | 81,576  | 30,164 | 28,190           | 83,589  | 1,529 | 225,943  | 63,478          | 16,943  | 60,670 | 930,652   |
|                      | Change (t)    | -856         | -15,870 | -2,035   | +1,600  | -1,925 | -1,799           | -2,585  | -151  | -92,286  | -21,159         | -2,094  | -3,193 | -142,356  |
|                      | Change (%)    | -9           | -11     | -1       | +2      | -6     | -6               | -3      | -9    | -29      | -25             | -11     | -5     | -13.3     |
| YFT                  | Average catch | 1,107        | 29,317  | 45,981   | 11,051  | 5,667  | 5,435            | 19,952  | 942   | 130,049  | 29,178          | 1,661   | 6,944  | 287,284   |
|                      | 2050 catch    | 1,140        | 27,558  | 42,303   | 10,830  | 6,064  | 5,054            | 17,957  | 970   | 117,044  | 26,844          | 1,661   | 6,666  | 264,091   |
|                      | Change (t)    | +33          | -1,759  | -3,678   | -221    | +397   | -380             | -1,995  | +28   | -13,005  | -2,334          | 0       | -278   | -23,193   |
|                      | Change (%)    | +3           | -6      | -8       | -2      | +7     | -7               | -10     | +3    | -10      | -8              | 0       | -4     | -8.1      |
| BET                  | Average catch | 460          | 4,998   | 10,544   | 3,670   | 3,523  | 1,578            | 4,667   | 33    | 12,754   | 3,061           | 693     | 2,273  | 48,256    |
|                      | 2050 catch    | 465          | 4,848   | 10,017   | 3,560   | 3,629  | 1,484            | 4,387   | 33    | 11,734   | 2,755           | 673     | 2,160  | 45,743    |
|                      | Change (t)    | +5           | -150    | -527     | -110    | +106   | -95              | -280    | 0     | -1,020   | -306            | -21     | -114   | -2,512    |
|                      | Change (%)    | +1           | -3      | -5       | -3      | +3     | -6               | -6      | +1    | -8       | -10             | -3      | -5     | -5.2      |
| All species combined | Average catch | 11,080       | 178,587 | 260,073  | 94,697  | 41,279 | 37,003           | 110,794 | 2,655 | 461,032  | 116,877         | 21,392  | 73,080 | 1,408,549 |
|                      | 2050 catch    | 10,262       | 160,808 | 253,832  | 95,965  | 39,856 | 34,728           | 105,933 | 2,533 | 354,720  | 93,077          | 19,277  | 69,496 | 1,240,487 |
|                      | Change (t)    | -818         | -17,779 | -6,241   | 1,268   | -1,423 | -2,275           | -4,860  | -123  | -106,312 | -23,800         | -2,115  | -3,585 | -168,061  |
|                      | Change (%)    | -7.4         | -10.0   | -2.4     | 1.3     | -3.4   | -6.1             | -4.4    | -4.6  | -23.1    | -20.4           | -9.9    | -4.9   | -11.9     |

**Supplementary Table 13c.** Projected *minimum* (i.e., minimum negative, maximum positive) changes in catches of skipjack (SKJ), yellowfin (YFT) and bigeye (BET) tuna in tonnes (t) caught by purse-seine fishing in the exclusive economic zones (EEZs) of 10 Pacific Island Small Developing States by 2050 under the IPCC RCP4.5 emissions scenario, relative to average catches for the 10-year period 2009–2018, based on the projected changes in biomass of each tuna species in Supplementary Table 18c. Changes in the total catch from all EEZs for each species, and for all species from all EEZs, are also shown. All values except ‘Change (%)’ for totals for EEZs and for all species combined are rounded to nearest whole number.

| Species              | Catch         | EEZ          |         |          |         |        |                  |         |       |         |                 |         | Total   |           |
|----------------------|---------------|--------------|---------|----------|---------|--------|------------------|---------|-------|---------|-----------------|---------|---------|-----------|
|                      |               | Cook Islands | FSM     | Kiribati |         |        | Marshall Islands | Nauru   | Palau | PNG     | Solomon Islands | Tokelau |         | Tuvalu    |
|                      |               |              |         | Gilbert  | Phoenix | Line   |                  |         |       |         |                 |         |         |           |
| SKJ                  | Average catch | 9,513        | 144,272 | 203,548  | 79,976  | 32,089 | 29,990           | 86,174  | 1,681 | 318,229 | 84,637          | 19,037  | 63,863  | 1,073,009 |
|                      | 2050 catch    | 12,082       | 151,485 | 246,293  | 91,173  | 35,619 | 34,188           | 105,133 | 2,017 | 324,594 | 92,255          | 25,319  | 77,913  | 1,198,069 |
|                      | Change (t)    | +2,569       | +7,214  | +42,745  | +11,197 | +3,530 | +4,199           | +18,958 | +336  | +6,365  | + 7,617         | +6,282  | +14,050 | 125,061   |
|                      | Change (%)    | +27          | +5      | +21      | +14     | +11    | +14              | +22     | +20   | +2      | +9              | +33     | +22     | +11.7     |
| YFT                  | Average catch | 1,107        | 29,317  | 45,981   | 11,051  | 5,667  | 5,435            | 19,952  | 942   | 130,049 | 29,178          | 1,661   | 6,944   | 287,284   |
|                      | 2050 catch    | 1,317        | 29,904  | 44,602   | 11,383  | 6,574  | 5,435            | 19,553  | 1,017 | 127,448 | 28,595          | 1,877   | 7,361   | 285,064   |
|                      | Change (t)    | +210         | +586    | -1,379   | +332    | + 907  | 0                | -399    | +75   | -2,601  | -584            | +216    | +417    | -2,220    |
|                      | Change (%)    | +19          | +2      | -3       | +3      | +16    | 0                | -2      | +8    | -2      | -2              | +13     | +6      | -0.8      |
| BET                  | Average catch | 460          | 4,998   | 10,544   | 3,670   | 3,523  | 1,578            | 4,667   | 33    | 12,754  | 3,061           | 693     | 2,273   | 48,256    |
|                      | 2050 catch    | 501          | 5,248   | 10,755   | 3,817   | 3,875  | 1,610            | 4,667   | 36    | 12,627  | 2,908           | 721     | 2,319   | 49,084    |
|                      | Change (t)    | +41          | + 250   | + 211    | +147    | +352   | +32              | 0       | +3    | -128    | -153            | +28     | +45     | + 828     |
|                      | Change (%)    | +9           | +5      | +2       | +4      | +10    | +2               | 0       | +9    | -1      | -5              | +4      | +2      | +9.0      |
| All species combined | Average catch | 11,080       | 178,587 | 260,073  | 94,697  | 41,279 | 37,003           | 110,794 | 2,655 | 461,032 | 116,877         | 21,392  | 73,080  | 1,408,549 |
|                      | 2050 catch    | 13,900       | 186,637 | 301,650  | 106,372 | 46,068 | 41,233           | 129,353 | 3,070 | 464,668 | 123,757         | 27,918  | 87,592  | 1,532,218 |
|                      | Change (t)    | +2,820       | +8,050  | +41,577  | +11,675 | +4,789 | +4,230           | +18,559 | +414  | +3,636  | +6,881          | +6,526  | +14,512 | +123,669  |
|                      | Change (%)    | +25.5        | +4.5    | +16.0    | +12.3   | +11.6  | +11.4            | +16.8   | +15.6 | +0.8    | +5.9            | +30.5   | +19.9   | +8.8      |

**Supplementary Table 14a.** Projected *average* changes in catches of skipjack (SKJ), yellowfin (YFT) and bigeye (BET) tuna in tonnes (t) caught by purse-seine fishing in the high-seas areas (Supplementary Figure 1) by 2050 under the IPCC RCP4.5 emissions scenario, relative to average catches for the 10-year period 2009–2018, based on the projected changes in biomass of each tuna species in Supplementary Table 18a. Changes in the total catch from all high-seas areas for each species, and for all species from all high-seas areas, are also shown. All values except ‘Change (%)’ for totals for high-seas areas and for all species combined are rounded to nearest whole number.

| Species              | Catch         | High-seas area |        |       |        |        |        |    |       |      |        |        |         |         |       | Total    |
|----------------------|---------------|----------------|--------|-------|--------|--------|--------|----|-------|------|--------|--------|---------|---------|-------|----------|
|                      |               | I1             | I2     | I3    | I4     | I5     | I6     | I7 | I8    | I9   | H4     | H5     | EPO-N   | EPO-C   | EPO-S |          |
| SKJ                  | Average catch | 10,528         | 18,630 | 45    | 16,516 | 16,994 | 15,459 | 13 | 2     | 24   | 18,431 | 39,150 | 7,072   | 254,602 | 2,031 | 399,495  |
|                      | 2050 catch    | 8,738          | 16,580 | 59    | 17,672 | 19,203 | 17,005 | 13 | 2     | 26   | 20,827 | 40,715 | 7,921   | 297,884 | 2,316 | 448,961  |
|                      | Change (t)    | -1,790         | -2,049 | +14   | +1,156 | +2,209 | +1,546 | 0  | 0     | +2   | +2,396 | +1,566 | + 849   | +43,282 | + 284 | +49,466  |
|                      | Change (%)    | -17            | -11    | +31   | +7     | +13    | +10    | 0  | +28   | +8   | +13    | +4     | +12     | +17     | +14   | +12.4    |
| YFT                  | Average catch | 4,215          | 3,647  | 1     | 3,199  | 3,530  | 507    | 3  | 1     | 6    | 1,936  | 5,542  | 77,092  | 147,743 | 540   | 247,960  |
|                      | 2050 catch    | 4,215          | 3,391  | 1     | 3,327  | 4,095  | 552    | 3  | 1     | 7    | 1,955  | 5,764  | 90,197  | 180,246 | 637   | 294,392  |
|                      | Change (t)    | 0              | -255   | 0     | +128   | + 565  | +46    | 0  | 0     | + 1  | +19    | + 222  | +13,106 | +32,503 | + 97  | +46,431  |
|                      | Change (%)    | 0              | -7     | +6    | +4     | +16    | +9     | +8 | +5    | +14  | +1     | +4     | +17     | +22     | +18   | +18.7    |
| BET                  | Average catch | 588            | 807    | 1     | 1,728  | 2,707  | 245    | 1  | 0     | 3    | 526    | 1,826  | 11      | 55,319  | 722   | 64,483   |
|                      | 2050 catch    | 588            | 766    | 1     | 1,728  | 2,896  | 243    | 1  | 0     | 3    | 526    | 1,880  | 12      | 63,064  | 794   | 72,503   |
|                      | Change (t)    | 0              | -40    | 0     | 0      | +189   | -2     | 0  | 0     | 0    | 0      | +55    | + 1     | +7,745  | +72   | + 8,020  |
|                      | Change (%)    | 0              | -7     | +6    | +4     | +16    | +9     | +8 | +5    | +14  | +1     | +4     | +17     | +22     | +18   | +12.4    |
| All species combined | Average catch | 15,330         | 23,083 | 47    | 21,443 | 23,231 | 16,211 | 17 | 2     | 33   | 20,893 | 46,517 | 84,175  | 457,664 | 3,293 | 711,939  |
|                      | 2050 catch    | 13,541         | 20,738 | 61    | 22,727 | 26,194 | 17,800 | 17 | 3     | 36   | 23,308 | 48,360 | 98,130  | 541,194 | 3,747 | 815,856  |
|                      | Change (t)    | -1,790         | -2,345 | +14   | +1,284 | +2,963 | +1,589 | 0  | +1    | +3   | +2,415 | +1,842 | +13,955 | +83,530 | +454  | +103,917 |
|                      | Change (%)    | -11.7          | -10.2  | +29.8 | +6.0   | +12.8  | +9.8   | 0  | +20.2 | +8.9 | + 11.6 | +4.0   | +16.6   | +18.3   | +13.8 | +14.6    |

**Supplementary Table 14b.** Projected *maximum* (i.e., maximum negative, minimum positive) changes in catches of skipjack (SKJ), yellowfin (YFT) and bigeye (BET) tuna in tonnes (t) caught by purse-seine fishing in the high-seas areas (Supplementary Figure 1) by 2050 under the IPCC RCP4.5 emissions scenario, relative to average catches for the 10-year period 2009–2018, based on the projected changes in biomass of each tuna species in Supplementary Table 18b. Changes in the total catch from all high-seas areas for each species, and for all species from all high-seas areas, are also shown. All values except ‘Change (%)’ for totals for high-seas areas and for all species combined are rounded to nearest whole number.

| Species              | Catch         | High-seas area |        |       |        |        |        |      |    |      |        |        |        |         |       | Total   |
|----------------------|---------------|----------------|--------|-------|--------|--------|--------|------|----|------|--------|--------|--------|---------|-------|---------|
|                      |               | I1             | I2     | I3    | I4     | I5     | I6     | I7   | I8 | I9   | H4     | H5     | EPO-N  | EPO-C   | EPO-S |         |
| SKJ                  | Average catch | 10,528         | 18,630 | 45    | 16,516 | 16,994 | 15,459 | 13   | 2  | 24   | 18,431 | 39,150 | 7,072  | 254,602 | 2,031 | 399,495 |
|                      | 2050 catch    | 7,580          | 14,531 | 54    | 16,516 | 16,654 | 14,995 | 12   | 2  | 22   | 19,168 | 38,758 | 7,567  | 262,240 | 2,113 | 400,211 |
|                      | Change (t)    | -2,948         | -4,099 | +9    | 0      | -340   | -464   | -1   | 0  | -2   | +737   | -391   | +495   | +7,638  | +81   | +716    |
|                      | Change (%)    | -28            | -22    | +19   | 0      | -2     | -3     | -9   | +2 | -7   | +4     | -1     | +7     | +3      | +4    | 0.2     |
| YFT                  | Average catch | 4,215          | 3,647  | 1     | 3,199  | 3,530  | 507    | 3    | 1  | 6    | 1,936  | 5,542  | 77,092 | 147,743 | 540   | 247,960 |
|                      | 2050 catch    | 4,131          | 3,282  | 1     | 3,167  | 3,918  | 527    | 3    | 1  | 6    | 1,897  | 5,653  | 84,801 | 168,427 | 567   | 276,380 |
|                      | Change (t)    | -84            | -365   | 0     | -32    | +388   | +20    | 0    | 0  | 0    | -39    | +111   | +7,709 | +20,684 | +27   | +28,420 |
|                      | Change (%)    | -2             | -10    | +4    | -1     | +11    | +4     | +3   | +1 | +4   | -2     | +2     | +10    | +14     | +5    | +11.5   |
| BET                  | Average catch | 588            | 807    | 1     | 1,728  | 2,707  | 245    | 1    | 0  | 3    | 526    | 1,826  | 11     | 55,319  | 722   | 64,483  |
|                      | 2050 catch    | 558            | 734    | 1     | 1,642  | 2,734  | 230    | 1    | 0  | 3    | 505    | 1,826  | 12     | 59,192  | 758   | 68,195  |
|                      | Change (t)    | -29            | -73    | 0     | -86    | +27    | -15    | 0    | 0  | 0    | -21    | 0      | +1     | +3,872  | +36   | 3,712   |
|                      | Change (%)    | -5             | -9     | -1    | -5     | +1     | -6     | -6   | -4 | +2   | -4     | 0      | +5     | +7      | +5    | 5.8     |
| All species combined | Average catch | 15,330         | 23,083 | 47    | 21,443 | 23,231 | 16,211 | 17   | 2  | 33   | 20,893 | 46,517 | 84,175 | 457,664 | 3,293 | 711,939 |
|                      | 2050 catch    | 12,269         | 18,547 | 56    | 21,324 | 23,306 | 15,753 | 16   | 2  | 32   | 21,570 | 46,237 | 92,380 | 489,858 | 3,437 | 744,787 |
|                      | Change (t)    | -3,062         | -4,536 | +9    | -118   | +75    | -458   | -1   | 0  | -1   | +677   | -281   | +8,205 | +32,194 | +144  | +32,848 |
|                      | Change (%)    | -20.0          | -19.6  | +18.3 | -0.6   | +0.3   | -2.8   | -6.8 | 0  | -4.1 | 3.2    | -0.6   | +9.7   | +7.0    | +4.4  | +4.6    |

**Supplementary Table 14c.** Projected *minimum* (i.e., minimum negative/maximum positive) changes in catches of skipjack (SKJ), yellowfin (YFT) and bigeye (BET) tuna in tonnes (t) caught by purse-seine fishing in the high-seas areas (Supplementary Figure 1) by 2050 under the IPCC RCP4.5 emissions scenario, relative to average catches for the 10-year period 2009–2018, based on the projected changes in biomass of each tuna species in Supplementary Table 18c. Changes in the total catch from all high-seas areas for each species, and for all species from all high-seas areas, are also shown. All values except ‘Change (%)’ for totals for high-seas areas and for all species combined are rounded to nearest whole number.

| Species              | Catch         | High-seas area |        |       |        |        |        |       |       |       |        |        |         |          |       | Total    |
|----------------------|---------------|----------------|--------|-------|--------|--------|--------|-------|-------|-------|--------|--------|---------|----------|-------|----------|
|                      |               | I1             | I2     | I3    | I4     | I5     | I6     | I7    | I8    | I9    | H4     | H5     | EPO-N   | EPO-C    | EPO-S |          |
| SKJ                  | Average catch | 10,528         | 18,630 | 45    | 16,516 | 16,994 | 15,459 | 13    | 2     | 24    | 18,431 | 39,150 | 7,072   | 254,602  | 2,031 | 399,495  |
|                      | 2050 catch    | 10,528         | 18,630 | 68    | 18,663 | 21,242 | 18,242 | 15    | 2     | 30    | 21,749 | 42,281 | 8,203   | 343,713  | 2,580 | 505,946  |
|                      | Change (t)    | 0              | 0      | +23   | +2,147 | +4,248 | +2,783 | +2    | 0     | +6    | +3,318 | +3,132 | +1,132  | +89,111  | +548  | +106,450 |
|                      | Change (%)    | 0              | 0      | +51   | +13    | +25    | +18    | +15   | +56   | +25   | +18    | +8     | +16     | +35      | +27   | +26.6    |
| YFT                  | Average catch | 4,215          | 3,647  | 1     | 3,199  | 3,530  | 507    | 3     | 1     | 6     | 1,936  | 5,542  | 77,092  | 147,743  | 540   | 247,960  |
|                      | 2050 catch    | 4,341          | 3,501  | 2     | 3,519  | 4,306  | 578    | 3     | 1     | 8     | 2,072  | 5,985  | 97,136  | 200,930  | 739   | 323,120  |
|                      | Change (t)    | +126           | -146   | 1     | +320   | +777   | +71    | 0     | 0     | 2     | +136   | +443   | +20,044 | +53,187  | +199  | +75,160  |
|                      | Change (%)    | +3             | -4     | +10   | +10    | +22    | +14    | +18   | +10   | +22   | +7     | +8     | +26     | +36      | +37   | +30.3    |
| BET                  | Average catch | 588            | 807    | 1     | 1,728  | 2,707  | 245    | 1     | 0     | 3     | 526    | 1,826  | 11      | 55,319   | 722   | 64,483   |
|                      | 2050 catch    | 599            | 791    | 1     | 1,780  | 2,977  | 248    | 1     | 0     | 3     | 547    | 1,953  | 13      | 67,489   | 859   | 77,262   |
|                      | Change (t)    | +12            | -16    | 0     | +52    | +271   | +2     | 0     | 0     | 0     | +21    | +128   | +2      | +12,170  | +137  | +12,779  |
|                      | Change (%)    | +2             | -2     | +7    | +3     | +10    | +1     | *8    | +3    | +11   | +4     | +7     | +16     | +22      | +19   | +19.8    |
| All species combined | Average catch | 15,330         | 23,083 | 47    | 21,443 | 23,231 | 16,211 | 17    | 2     | 33    | 20,893 | 46,517 | 84,175  | 457,664  | 3,293 | 711,939  |
|                      | 2050 catch    | 15,468         | 22,921 | 70    | 23,961 | 28,526 | 19,067 | 19    | 3     | 41    | 24,367 | 50,220 | 105,352 | 612,132  | 4,178 | 906,328  |
|                      | Change (t)    | +138           | -162   | +23   | +2,519 | +5,296 | +2,856 | +2    | 1     | +8    | +3,474 | +3,703 | +21,177 | +154,468 | +885  | +194,389 |
|                      | Change (%)    | +0.9           | -0.7   | +49.1 | +11.7  | +22.8  | +17.6  | +12.0 | +50.0 | +24.2 | +16.6  | +8.0   | +25.2   | +33.8    | +26.9 | +27.3    |



**Supplementary Table 15a.** Estimated *average* changes in tuna-fishing access fees, and total government revenue (excluding grants) in percentage terms, for 10 Pacific Small Island Developing States (Pacific SIDS) under the RCP8.5 emissions scenario by 2050. Numbers have been rounded to one decimal place, see spreadsheets at <https://osf.io/qa8w4/> for details of calculations. FSM = Federated States of Micronesia; PNG = Papua New Guinea.

| Pacific SIDS | Average 2015–2018           |                           |                                | Change in tuna catch by 2050 (RCP8.5) (%)* | 2050 (RCP8.5)               |                           |                                | Change by 2050            |                   |
|--------------|-----------------------------|---------------------------|--------------------------------|--------------------------------------------|-----------------------------|---------------------------|--------------------------------|---------------------------|-------------------|
|              | Gov't revenue (USD) million | Access fees (USD) million | Access fees as % Gov't revenue |                                            | Gov't revenue (USD) million | Access fees (USD) million | Access fees as % Gov't revenue | Access fees (USD) million | Gov't revenue (%) |
| Cook Is      | 126.1                       | 13.5                      | 10.6                           | -4.0                                       | 125.6                       | 13.0                      | 10.3                           | -0.5                      | -0.4              |
| FSM          | 150.6                       | 68.4                      | 47.6                           | -13.0                                      | 141.8                       | 59.5                      | 42.0                           | -8.9                      | -5.9              |
| Kiribati     | 181.7                       | 128.3                     | 70.6                           | -8.2                                       | 171.2                       | 117.8                     | 68.8                           | -10.5                     | -5.8              |
| Marshall Is  | 66.1                        | 31.0                      | 47.8                           | -0.7                                       | 65.8                        | 30.8                      | 46.8                           | -0.2                      | -0.3              |
| Nauru        | 98.6                        | 29.5                      | 31.1                           | -21.6                                      | 92.2                        | 23.2                      | 25.1                           | -6.4                      | -6.5              |
| Palau        | 75.2                        | 7.1                       | 9.4                            | -0.3                                       | 75.2                        | 7.1                       | 9.4                            | -0.02                     | -0.03             |
| PNG          | 3360.8                      | 134.3                     | 4.0                            | -33.1                                      | 3316.4                      | 89.8                      | 2.7                            | -44.4                     | -1.3              |
| Solomon Is   | 429.0                       | 41.3                      | 9.6                            | -26.1                                      | 418.2                       | 30.5                      | 7.3                            | -10.8                     | -2.5              |
| Tokelau      | 16.0                        | 13.4                      | 84.2                           | -16.1                                      | 13.9                        | 11.2                      | 80.9                           | -2.1                      | -13.4             |
| Tuvalu       | 47.4                        | 25.6                      | 53.9                           | -23.4                                      | 41.4                        | 19.6                      | 47.4                           | -6.0                      | -12.6             |
| <b>Total</b> |                             | <b>492.4</b>              |                                |                                            |                             | <b>402.5</b>              |                                | <b>-89.9</b>              |                   |

\* Based on the weighted average change in biomass of skipjack, yellowfin and bigeye tuna (see Supplementary Table 17a, and Supplementary Table 19a for Kiribati)

**Supplementary Table 15b.** Estimated *maximum* changes in tuna-fishing access fees, and total government revenue (excluding grants) in percentage terms, for 10 Pacific Small Island Developing States (Pacific SIDS) under the RCP8.5 emissions scenario by 2050. Numbers have been rounded to one decimal place, see spreadsheets at <https://osf.io/qa8w4/> for details of calculations. FSM = Federated States of Micronesia; PNG = Papua New Guinea.

| Pacific SIDS | Average 2015–2018           |                           |                                | Change in tuna catch by 2050 (RCP8.5) (%)* | 2050 (RCP8.5)               |                           |                                | Change by 2050            |                   |
|--------------|-----------------------------|---------------------------|--------------------------------|--------------------------------------------|-----------------------------|---------------------------|--------------------------------|---------------------------|-------------------|
|              | Gov't revenue (USD) million | Access fees (USD) million | Access fees as % Gov't revenue |                                            | Gov't revenue (USD) million | Access fees (USD) million | Access fees as % Gov't revenue | Access fees (USD) million | Gov't revenue (%) |
| Cook Is      | 126.1                       | 13.5                      | 10.6                           | -8.3                                       | 125.0                       | 12.4                      | 9.9                            | -1.1                      | -0.9              |
| FSM          | 150.6                       | 68.4                      | 47.6                           | -21.6                                      | 135.9                       | 53.6                      | 39.4                           | -14.8                     | -9.8              |
| Kiribati     | 181.7                       | 128.3                     | 70.6                           | -19.0                                      | 157.3                       | 103.9                     | 66.1                           | -24.4                     | -13.4             |
| Marshall Is  | 66.1                        | 31.0                      | 47.8                           | -8.6                                       | 63.4                        | 28.4                      | 44.7                           | -2.7                      | -4.0              |
| Nauru        | 98.6                        | 29.5                      | 31.1                           | -37.1                                      | 87.6                        | 18.6                      | 21.2                           | -10.9                     | -11.1             |
| Palau        | 75.2                        | 7.1                       | 9.4                            | -9.5                                       | 74.5                        | 6.4                       | 8.6                            | -0.7                      | -0.9              |
| PNG          | 3360.8                      | 134.3                     | 4.0                            | -43.1                                      | 3302.9                      | 76.4                      | 2.3                            | -57.9                     | -1.7              |
| Solomon Is   | 429.0                       | 41.3                      | 9.6                            | -36.8                                      | 413.8                       | 26.1                      | 6.3                            | -15.2                     | -3.5              |
| Tokelau      | 16.0                        | 13.4                      | 84.2                           | -20.2                                      | 13.3                        | 10.7                      | 80.1                           | -2.7                      | -16.9             |
| Tuvalu       | 47.4                        | 25.6                      | 53.9                           | -31.7                                      | 39.3                        | 17.5                      | 44.6                           | -8.1                      | -17.1             |
| <b>Total</b> |                             | <b>492.4</b>              |                                |                                            |                             | <b>354.0</b>              |                                | <b>-138.5</b>             |                   |

\*Based on the weighted average change in biomass of skipjack, yellowfin and bigeye tuna (see Supplementary Table 17b, and Supplementary Table 19b for Kiribati)

**Supplementary Table 15c.** Estimated *minimum* changes in tuna-fishing access fees, and total government revenue (excluding grants) in percentage terms, for 10 Pacific Small Island Developing States (Pacific SIDS) under the RCP8.5 emissions scenario by 2050. Numbers have been rounded to one decimal place, see spreadsheets at <https://osf.io/qa8w4/> for details of calculations. FSM = Federated States of Micronesia; PNG = Papua New Guinea.

| Pacific SIDS | Average 2015–2018           |                           |                                | Change in tuna catch by 2050 (RCP8.5) (%)* | 2050 (RCP8.5)               |                           |                                | Change by 2050            |                   |
|--------------|-----------------------------|---------------------------|--------------------------------|--------------------------------------------|-----------------------------|---------------------------|--------------------------------|---------------------------|-------------------|
|              | Gov't revenue (USD) million | Access fees (USD) million | Access fees as % Gov't revenue |                                            | Gov't revenue (USD) million | Access fees (USD) million | Access fees as % Gov't revenue | Access fees (USD) million | Gov't revenue (%) |
| Cook Is      | 126.1                       | 13.5                      | 10.6                           | +1.2                                       | 126.3                       | 13.7                      | 10.8                           | +0.2                      | +0.1              |
| FSM          | 150.6                       | 68.4                      | 47.6                           | -5.1                                       | 147.2                       | 64.9                      | 44.1                           | -3.5                      | -2.3              |
| Kiribati     | 181.7                       | 128.3                     | 70.6                           | +0.9                                       | 182.9                       | 129.5                     | 70.8                           | +1.2                      | +0.6              |
| Marshall Is  | 66.1                        | 31.0                      | 47.8                           | +5.4                                       | 67.7                        | 32.7                      | 48.3                           | +1.7                      | +2.5              |
| Nauru        | 98.6                        | 29.5                      | 31.1                           | -6.0                                       | 96.8                        | 27.7                      | 28.7                           | -1.8                      | -1.8              |
| Palau        | 75.2                        | 7.1                       | 9.4                            | +12.6                                      | 76.1                        | 8.0                       | 10.5                           | +0.9                      | +1.2              |
| PNG          | 3360.8                      | 134.3                     | 4.0                            | -22.0                                      | 3331.3                      | 104.7                     | 3.1                            | -29.5                     | -0.9              |
| Solomon Is   | 429.0                       | 41.3                      | 9.6                            | -17.3                                      | 421.8                       | 34.2                      | 8.1                            | -7.2                      | -1.7              |
| Tokelau      | 16.0                        | 13.4                      | 84.2                           | -4.9                                       | 15.4                        | 12.7                      | 82.7                           | -0.7                      | -4.1              |
| Tuvalu       | 47.4                        | 25.6                      | 53.9                           | -14.3                                      | 43.7                        | 22.0                      | 50.2                           | -3.7                      | -7.7              |
| <b>Total</b> |                             | <b>492.4</b>              |                                |                                            |                             | <b>450.0</b>              |                                | <b>-42.4</b>              |                   |

\* Based on the weighted average change in biomass of skipjack, yellowfin and bigeye tuna (see Supplementary Table 17c, and Supplementary Table 19c for Kiribati)

**Supplementary Table 16a.** Estimated *average* changes in tuna-fishing access fees, and total government revenue (excluding grants) in percentage terms, for 10 Pacific Small Island Developing States (Pacific SIDS) under the RCP8.5 emissions scenario by 2050. Numbers have been rounded to one decimal place, see spreadsheets at <https://osf.io/qa8w4/> for details of calculations. FSM = Federated States of Micronesia; PNG = Papua New Guinea.

| Pacific SIDS | Average 2015–2018           |                           |                                | Change in tuna catch by 2050 (RCP4.5) (%)* | 2050 (RCP4.5)               |                           |                                | Change by 2050            |                   |
|--------------|-----------------------------|---------------------------|--------------------------------|--------------------------------------------|-----------------------------|---------------------------|--------------------------------|---------------------------|-------------------|
|              | Gov't revenue (USD) million | Access fees (USD) million | Access fees as % Gov't revenue |                                            | Gov't revenue (USD) million | Access fees (USD) million | Access fees as % Gov't revenue | Access fees (USD) million | Gov't revenue (%) |
| Cook Is      | 126.1                       | 13.5                      | 10.6                           | +8.9                                       | 127.3                       | 14.7                      | 11.6                           | +1.2                      | +1.0              |
| FSM          | 150.6                       | 68.4                      | 47.6                           | -2.7                                       | 148.8                       | 66.5                      | 44.7                           | -1.8                      | -1.2              |
| Kiribati     | 181.7                       | 128.3                     | 70.6                           | +6.9                                       | 190.6                       | 137.2                     | 72.0                           | +8.9                      | +4.9              |
| Marshall Is  | 66.1                        | 31.0                      | 47.8                           | +2.1                                       | 66.7                        | 31.7                      | 47.5                           | +0.7                      | +1.0              |
| Nauru        | 98.6                        | 29.5                      | 31.1                           | +5.7                                       | 100.2                       | 31.2                      | 31.1                           | +1.7                      | +1.7              |
| Palau        | 75.2                        | 7.1                       | 9.4                            | +3.1                                       | 75.4                        | 7.3                       | 9.7                            | +0.2                      | +0.3              |
| PNG          | 3360.8                      | 134.3                     | 4.0                            | -15.5                                      | 3340.0                      | 113.5                     | 3.4                            | -20.8                     | -0.6              |
| Solomon Is   | 429.0                       | 41.3                      | 9.6                            | -8.7                                       | 425.4                       | 37.7                      | 8.9                            | -3.6                      | -0.8              |
| Tokelau      | 16.0                        | 13.4                      | 84.2                           | +5.7                                       | 16.8                        | 14.1                      | 84.2                           | +0.8                      | +4.8              |
| Tuvalu       | 47.4                        | 25.6                      | 53.9                           | +3.4                                       | 48.3                        | 26.5                      | 54.9                           | +0.9                      | +1.9              |
| <b>Total</b> |                             | <b>492.4</b>              |                                |                                            |                             | <b>480.5</b>              |                                | <b>-12.0</b>              |                   |

\*Based on the weighted average change in biomass of skipjack, yellowfin and bigeye tuna (see Supplementary Table 18a, and Supplementary Table 20a for Kiribati)

**Supplementary Table 16b.** Estimated *maximum* changes in tuna-fishing access fees, and total government revenue (excluding grants) in percentage terms, for 10 Pacific Small Island Developing States (Pacific SIDS) under the RCP8.5 emissions scenario by 2050. Numbers have been rounded to one decimal place, see spreadsheets at <https://osf.io/qa8w4/> for details of calculations. FSM = Federated States of Micronesia; PNG = Papua New Guinea.

| Pacific SIDS | Average 2015–2018           |                           |                                | Change in tuna catch by 2050 (RCP4.5) (%)* | 2050 (RCP4.5)               |                           |                                | Change by 2050            |                   |
|--------------|-----------------------------|---------------------------|--------------------------------|--------------------------------------------|-----------------------------|---------------------------|--------------------------------|---------------------------|-------------------|
|              | Gov't revenue (USD) million | Access fees (USD) million | Access fees as % Gov't revenue |                                            | Gov't revenue (USD) million | Access fees (USD) million | Access fees as % Gov't revenue | Access fees (USD) million | Gov't revenue (%) |
| Cook Is      | 126.1                       | 13.5                      | 10.6                           | -7.4                                       | 125.1                       | 12.5                      | 10.0                           | -1.0                      | -0.8              |
| FSM          | 150.6                       | 68.4                      | 47.6                           | -10.0                                      | 143.8                       | 61.5                      | 42.8                           | -6.8                      | -4.5              |
| Kiribati     | 181.7                       | 128.3                     | 70.6                           | -1.6                                       | 179.7                       | 126.3                     | 70.3                           | -2.1                      | -1.1              |
| Marshall Is  | 66.1                        | 31.0                      | 47.8                           | -6.1                                       | 64.2                        | 29.1                      | 45.4                           | -1.9                      | -2.9              |
| Nauru        | 98.6                        | 29.5                      | 31.1                           | -4.4                                       | 97.3                        | 28.2                      | 29.0                           | -1.3                      | -1.3              |
| Palau        | 75.2                        | 7.1                       | 9.4                            | -4.7                                       | 74.9                        | 6.8                       | 9.1                            | -0.3                      | -0.4              |
| PNG          | 3360.8                      | 134.3                     | 4.0                            | -23.1                                      | 3329.8                      | 103.3                     | 3.1                            | -31.0                     | -0.9              |
| Solomon Is   | 429.0                       | 41.3                      | 9.6                            | -20.4                                      | 420.6                       | 32.9                      | 7.8                            | -8.4                      | -2.0              |
| Tokelau      | 16.0                        | 13.4                      | 84.2                           | -9.9                                       | 14.7                        | 12.1                      | 82.0                           | -1.3                      | -8.3              |
| Tuvalu       | 47.4                        | 25.6                      | 53.9                           | -4.9                                       | 46.1                        | 24.4                      | 52.8                           | -1.3                      | -2.7              |
| <b>Total</b> |                             | <b>492.4</b>              |                                |                                            |                             | <b>437.1</b>              |                                | <b>-55.3</b>              |                   |

\*Based on the weighted average change in biomass of skipjack, yellowfin and bigeye tuna (see Supplementary Table 18b, and Supplementary Table 20b for Kiribati)

**Supplementary Table 16c.** Estimated *minimum* changes in tuna-fishing access fees, and total government revenue (excluding grants) in percentage terms, for 10 Pacific Small Island Developing States (Pacific SIDS) under the RCP8.5 emissions scenario by 2050. Numbers have been rounded to one decimal place, see spreadsheets at <https://osf.io/qa8w4/> for details of calculations. FSM = Federated States of Micronesia; PNG = Papua New Guinea.

| Pacific SIDS | Average 2015–2018           |                           |                                | Change in tuna catch by 2050 (RCP4.5) (%)* | 2050 (RCP4.5)               |                           |                                | Change by 2050            |                   |
|--------------|-----------------------------|---------------------------|--------------------------------|--------------------------------------------|-----------------------------|---------------------------|--------------------------------|---------------------------|-------------------|
|              | Gov't revenue (USD) million | Access fees (USD) million | Access fees as % Gov't revenue |                                            | Gov't revenue (USD) million | Access fees (USD) million | Access fees as % Gov't revenue | Access fees (USD) million | Gov't revenue (%) |
| Cook Is      | 126.1                       | 13.5                      | 10.6                           | +25.5                                      | 129.6                       | 16.9                      | 13.1                           | +3.4                      | +2.7              |
| FSM          | 150.6                       | 68.4                      | 47.6                           | +4.5                                       | 153.7                       | 71.4                      | 46.5                           | +3.1                      | +2.0              |
| Kiribati     | 181.7                       | 128.3                     | 70.6                           | +14.7                                      | 200.6                       | 147.2                     | 73.4                           | +18.9                     | +10.4             |
| Marshall Is  | 66.1                        | 31.0                      | 47.8                           | +11.4                                      | 69.6                        | 34.6                      | 49.7                           | +3.5                      | +5.4              |
| Nauru        | 98.6                        | 29.5                      | 31.1                           | +16.8                                      | 103.5                       | 34.5                      | 33.3                           | +4.9                      | +5.0              |
| Palau        | 75.2                        | 7.1                       | 9.4                            | +15.7                                      | 76.3                        | 8.2                       | 10.8                           | +1.1                      | +1.5              |
| PNG          | 3360.8                      | 134.3                     | 4.0                            | +0.8                                       | 3361.9                      | 135.3                     | 4.0                            | +1.1                      | <0.001            |
| Solomon Is   | 429.0                       | 41.3                      | 9.6                            | +5.9                                       | 431.4                       | 43.7                      | 10.1                           | +2.4                      | +0.6              |
| Tokelau      | 16.0                        | 13.4                      | 84.2                           | +30.5                                      | 20.1                        | 17.5                      | 86.8                           | +4.1                      | +25.5             |
| Tuvalu       | 47.4                        | 25.6                      | 53.9                           | +19.9                                      | 52.5                        | 30.7                      | 58.5                           | +5.1                      | +10.7             |
| <b>Total</b> |                             | <b>492.4</b>              |                                |                                            |                             | <b>540.1</b>              |                                | <b>+47.7</b>              |                   |

\* Based on weighted average change in biomass of skipjack, yellowfin and bigeye tuna (see Supplementary Table 18c, and Supplementary Table 20c for Kiribati).

**Supplementary Table 17a.** Projected *average* percentage changes in purse-seine catch in the exclusive economic zones (EEZs) of 10 Pacific Small Island Developing States (Pacific SIDS), and high-seas areas (Supplementary Figure 1), based on SEAPODYM simulations for the IPCC RCP8.5 emissions scenario by 2050. Projections for the percentage changes in purse-seine catch are based on average percentage changes in combined biomass of skipjack, yellowfin and bigeye tuna, weighted by their average relative abundance in purse-seine catches for the 10-year period (2009–2018) (Supplementary Tables 3 and 4). FSM = Federated States of Micronesia; PNG = Papua New Guinea.

| Area                               | Relative abundance of tuna species (%)* |           |          | Projected changes in biomass (%) |           |          | Change in purse-seine catch by 2050 (%)** |
|------------------------------------|-----------------------------------------|-----------|----------|----------------------------------|-----------|----------|-------------------------------------------|
|                                    | Skipjack                                | Yellowfin | Bigeye   | Skipjack                         | Yellowfin | Bigeye   |                                           |
|                                    | <i>a</i>                                | <i>b</i>  | <i>c</i> | <i>d</i>                         | <i>e</i>  | <i>f</i> |                                           |
| <b><i>EEZs of Pacific SIDS</i></b> |                                         |           |          |                                  |           |          |                                           |
| Cook Islands                       | 85.9                                    | 10.0      | 4.1      | -6                               | +11       | +2       | -4.0                                      |
| FSM                                | 80.8                                    | 16.4      | 2.8      | -14                              | -10       | -1       | -13.0                                     |
| Kiribati - Gilbert Is              | 78.3                                    | 17.7      | 4.1      | -14                              | -13       | -4       | -13.4                                     |
| Kiribati - Phoenix Is              | 84.5                                    | 11.7      | 3.9      | -2                               | -7        | -5       | -2.7                                      |
| Kiribati - Line Is                 | 77.7                                    | 13.7      | 8.5      | +14                              | +7        | +1       | +11.9                                     |
| Marshall Islands                   | 81.0                                    | 14.7      | 4.3      | +1                               | -10       | -2       | -0.7                                      |
| Nauru                              | 77.8                                    | 18.0      | 4.2      | -24                              | -15       | -5       | -21.6                                     |
| Palau                              | 64.0                                    | 35.5      | 1.2      | 0                                | -1        | +1       | -0.3                                      |
| PNG                                | 69.0                                    | 28.2      | 2.8      | -42                              | -14       | -6       | -33.1                                     |
| Solomon Islands                    | 72.4                                    | 25.0      | 2.6      | -32                              | -11       | -6       | -26.1                                     |
| Tokelau                            | 89.0                                    | 7.8       | 3.2      | -18                              | +1        | -4       | -16.1                                     |
| Tuvalu                             | 87.4                                    | 9.5       | 3.1      | -26                              | -5        | -6       | -23.4                                     |
| <b><i>High-seas areas</i></b>      |                                         |           |          |                                  |           |          |                                           |
| I1                                 | 68.7                                    | 27.5      | 3.8      | -34                              | -8        | -3       | -25.7                                     |
| I2                                 | 80.7                                    | 15.8      | 3.5      | -33                              | -13       | -6       | -28.9                                     |
| I3                                 | 95.6                                    | 3.0       | 1.5      | +29                              | +3        | +2       | +27.8                                     |
| I4                                 | 77.0                                    | 14.9      | 8.1      | +3                               | -3        | -4       | +1.5                                      |
| I5                                 | 73.2                                    | 15.2      | 11.7     | +26                              | +9        | +2       | +20.6                                     |
| I6                                 | 95.4                                    | 3.1       | 1.5      | +4                               | +9        | -3       | +4.1                                      |
| I7                                 | 76.6                                    | 16.2      | 7.2      | +10                              | +9        | -2       | +9.0                                      |
| I8                                 | 68.2                                    | 22.7      | 9.1      | +23                              | 0         | -2       | +15.5                                     |
| I9                                 | 72.3                                    | 18.7      | 9.0      | +29                              | +18       | +4       | +24.7                                     |
| H4                                 | 88.2                                    | 9.3       | 2.5      | -16                              | -6        | -6       | -14.8                                     |
| H5                                 | 84.2                                    | 11.9      | 3.9      | +8                               | -2        | -2       | +6.4                                      |
| EPO-N                              | 8.4                                     | 91.6      | 0.0      | +12                              | +20       | +11      | +19.3                                     |
| EPO-C                              | 55.6                                    | 32.3      | 12.1     | +32                              | +26       | +10      | +27.4                                     |
| EPO-S                              | 61.7                                    | 16.4      | 21.9     | +36                              | +41       | +13      | +31.8                                     |

\*Rounded to one decimal place; \*\*Calculated as  $((a \times d) + (b \times e) + (c \times f))/100$

**Supplementary Table 17b.** Projected *maximum* (i.e., maximum negative/minimum positive) percentage changes in purse-seine catch in the exclusive economic zones (EEZs) of 10 Pacific Small Island Developing States (Pacific SIDS), and high-seas areas (Supplementary Figure 1), based on SEAPODYM simulations for the IPCC RCP8.5 emissions scenario by 2050. Projections for the percentage changes in purse-seine catch are based on average percentage changes in combined biomass of skipjack, yellowfin and bigeye tuna, weighted by their average relative abundance in purse-seine catches for the 10-year period (2009–2018) (Supplementary Tables 3 and 4). FSM = Federated States of Micronesia; PNG = Papua New Guinea.

| Area                               | Relative abundance of tuna species (%)* |           |          | Projected changes in biomass (%) |           |          | Change in purse-seine catch by 2050 (%)** |
|------------------------------------|-----------------------------------------|-----------|----------|----------------------------------|-----------|----------|-------------------------------------------|
|                                    | Skipjack                                | Yellowfin | Bigeye   | Skipjack                         | Yellowfin | Bigeye   |                                           |
|                                    | <i>a</i>                                | <i>b</i>  | <i>c</i> | <i>d</i>                         | <i>e</i>  | <i>f</i> |                                           |
| <b><i>EEZs of Pacific SIDS</i></b> |                                         |           |          |                                  |           |          |                                           |
| Cook Islands                       | 85.9                                    | 10.0      | 4.1      | -10                              | +3        | -1       | -8.3                                      |
| FSM                                | 80.8                                    | 16.4      | 2.8      | -24                              | -13       | -4       | -21.6                                     |
| Kiribati - Gilbert Is              | 78.3                                    | 17.7      | 4.1      | -29                              | -15       | -5       | -25.6                                     |
| Kiribati - Phoenix Is              | 84.5                                    | 11.7      | 3.9      | -13                              | -9        | -6       | -12.3                                     |
| Kiribati - Line Is                 | 77.7                                    | 13.7      | 8.5      | +9                               | +2        | -1       | +7.2                                      |
| Marshall Islands                   | 81.0                                    | 14.7      | 4.3      | -8                               | -13       | -6       | -8.6                                      |
| Nauru                              | 77.8                                    | 18.0      | 4.2      | -43                              | -19       | -5       | -37.1                                     |
| Palau                              | 64.0                                    | 35.5      | 1.2      | -12                              | -5        | -1       | -9.5                                      |
| PNG                                | 69.0                                    | 28.2      | 2.8      | -54                              | -20       | -7       | -43.1                                     |
| Solomon Islands                    | 72.4                                    | 25.0      | 2.6      | -46                              | -13       | -8       | -36.8                                     |
| Tokelau                            | 89.0                                    | 7.8       | 3.2      | -22                              | -5        | -7       | -20.2                                     |
| Tuvalu                             | 87.4                                    | 9.5       | 3.1      | -35                              | -9        | -8       | -31.7                                     |
| <b><i>High-seas areas</i></b>      |                                         |           |          |                                  |           |          |                                           |
| I1                                 | 68.7                                    | 27.5      | 3.8      | -50                              | -12       | -6       | -37.9                                     |
| I2                                 | 80.7                                    | 15.8      | 3.5      | -51                              | -16       | -8       | -44.0                                     |
| I3                                 | 95.6                                    | 3.0       | 1.5      | +9                               | -1        | 0        | +8.6                                      |
| I4                                 | 77.0                                    | 14.9      | 8.1      | -7                               | -7        | -6       | -6.9                                      |
| I5                                 | 73.2                                    | 15.2      | 11.7     | +13                              | +3        | -2       | +9.7                                      |
| I6                                 | 95.4                                    | 3.1       | 1.5      | -10                              | +3        | -6       | -9.5                                      |
| I7                                 | 76.6                                    | 16.2      | 7.2      | +1                               | +2        | -6       | +0.7                                      |
| I8                                 | 68.2                                    | 22.7      | 9.1      | -7                               | -5        | -4       | -6.3                                      |
| I9                                 | 72.3                                    | 18.7      | 9.0      | +19                              | +7        | +1       | +15.1                                     |
| H4                                 | 88.2                                    | 9.3       | 2.5      | -26                              | -10       | -7       | -24.0                                     |
| H5                                 | 84.2                                    | 11.9      | 3.9      | 0                                | -6        | -4       | -0.9                                      |
| EPO-N                              | 8.4                                     | 91.6      | 0.0      | +2                               | +14       | +6       | +13.0                                     |
| EPO-C                              | 55.6                                    | 32.3      | 12.1     | +16                              | +17       | +5       | +15.0                                     |
| EPO-S                              | 61.7                                    | 16.4      | 21.9     | +23                              | +25       | +6       | +19.6                                     |

\*Rounded to one decimal place; \*\*Calculated as  $((a \times d) + (b \times e) + (c \times f))/100$



**Supplementary Table 17c.** Projected *minimum* (i.e., minimum negative/maximum positive) percentage changes in purse-seine catch in the exclusive economic zones (EEZs) of 10 Pacific Small Island Developing States (Pacific SIDS), and high-seas areas (Supplementary Figure 1), based on SEAPODYM simulations for the IPCC RCP8.5 emissions scenario by 2050. Projections for the percentage changes in purse-seine catch are based on average percentage changes in combined biomass of skipjack, yellowfin and bigeye tuna, weighted by their average relative abundance in purse-seine catches for the 10-year period (2009–2018) (Supplementary Tables 3 and 4). FSM = Federated States of Micronesia; PNG = Papua New Guinea.

| Area                               | Relative abundance of tuna species (%)* |           |          | Projected changes in biomass (%) |           |          | Change in purse-seine catch by 2050 (%)** |
|------------------------------------|-----------------------------------------|-----------|----------|----------------------------------|-----------|----------|-------------------------------------------|
|                                    | Skipjack                                | Yellowfin | Bigeye   | Skipjack                         | Yellowfin | Bigeye   |                                           |
|                                    | <i>a</i>                                | <i>b</i>  | <i>c</i> | <i>d</i>                         | <i>e</i>  | <i>f</i> |                                           |
| <b><i>EEZs of Pacific SIDS</i></b> |                                         |           |          |                                  |           |          |                                           |
| Cook Islands                       | 85.9                                    | 10.0      | 4.1      | -1                               | +18       | +7       | +1.2                                      |
| FSM                                | 80.8                                    | 16.4      | 2.8      | -5                               | -7        | +3       | -5.1                                      |
| Kiribati - Gilbert Is              | 78.3                                    | 17.7      | 4.1      | -1                               | -10       | -3       | -2.7                                      |
| Kiribati - Phoenix Is              | 84.5                                    | 11.7      | 3.9      | +5                               | -5        | -4       | +3.5                                      |
| Kiribati - Line Is                 | 77.7                                    | 13.7      | 8.5      | +20                              | +13       | +3       | +17.6                                     |
| Marshall Islands                   | 81.0                                    | 14.7      | 4.3      | +8                               | -8        | +1       | +5.4                                      |
| Nauru                              | 77.8                                    | 18.0      | 4.2      | -5                               | -11       | -4       | -6.0                                      |
| Palau                              | 64.0                                    | 35.5      | 1.2      | +19                              | +1        | +5       | +12.6                                     |
| PNG                                | 69.0                                    | 28.2      | 2.8      | -28                              | -9        | -5       | -22.0                                     |
| Solomon Islands                    | 72.4                                    | 25.0      | 2.6      | -21                              | -8        | -5       | -17.3                                     |
| Tokelau                            | 89.0                                    | 7.8       | 3.2      | -6                               | +6        | -1       | -4.9                                      |
| Tuvalu                             | 87.4                                    | 9.5       | 3.1      | -16                              | -2        | -4       | -14.3                                     |
| <b><i>High-seas areas</i></b>      |                                         |           |          |                                  |           |          |                                           |
| I1                                 | 68.7                                    | 27.5      | 3.8      | -15                              | -3        | -1       | -11.2                                     |
| I2                                 | 80.7                                    | 15.8      | 3.5      | -17                              | -10       | -5       | -15.5                                     |
| I3                                 | 95.6                                    | 3.0       | 1.5      | +47                              | +7        | +5       | +45.2                                     |
| I4                                 | 77.0                                    | 14.9      | 8.1      | +9                               | +3        | -1       | +7.3                                      |
| I5                                 | 73.2                                    | 15.2      | 11.7     | +41                              | +20       | +4       | +33.5                                     |
| I6                                 | 95.4                                    | 3.1       | 1.5      | +16                              | +17       | +1       | +15.8                                     |
| I7                                 | 76.6                                    | 16.2      | 7.2      | +30                              | +18       | +6       | +26.3                                     |
| I8                                 | 68.2                                    | 22.7      | 9.1      | +48                              | +4        | 0        | +33.6                                     |
| I9                                 | 72.3                                    | 18.7      | 9.0      | +48                              | +27       | +9       | +40.6                                     |
| H4                                 | 88.2                                    | 9.3       | 2.5      | -9                               | -4        | -4       | -8.4                                      |
| H5                                 | 84.2                                    | 11.9      | 3.9      | +12                              | +1        | -1       | +10.2                                     |
| EPO-N                              | 8.4                                     | 91.6      | 0.0      | +19                              | +25       | +18      | +24.5                                     |
| EPO-C                              | 55.6                                    | 32.3      | 12.1     | +43                              | +35       | +14      | +36.9                                     |
| EPO-S                              | 61.7                                    | 16.4      | 21.9     | +48                              | +63       | +24      | +45.2                                     |

\* Rounded to one decimal place; \*\*Calculated as  $((a \times d) + (b \times e) + (c \times f))/100$

**Supplementary Table 18a.** Projected *average* percentage changes in purse-seine catch in the exclusive economic zones (EEZs) of 10 Pacific Small Island Developing States (Pacific SIDS), and high-seas areas (Supplementary Figure 1), based on SEAPODYM simulations for the IPCC RCP4.5 emissions scenario by 2050. Projections for the percentage changes in purse-seine catch are based on average percentage changes in combined biomass of skipjack, yellowfin and bigeye tuna, weighted by their average relative abundance in purse-seine catches for the 10-year period (2009–2018) (Supplementary Tables 3 and 4). FSM = Federated States of Micronesia; PNG = Papua New Guinea.

| Area                               | Relative abundance of tuna species (%)* |           |          | Projected changes in biomass (%) |           |          | Change in purse-seine catch by 2050 (%)** |
|------------------------------------|-----------------------------------------|-----------|----------|----------------------------------|-----------|----------|-------------------------------------------|
|                                    | Skipjack                                | Yellowfin | Bigeye   | Skipjack                         | Yellowfin | Bigeye   |                                           |
|                                    | <i>a</i>                                | <i>B</i>  | <i>c</i> | <i>d</i>                         | <i>e</i>  | <i>F</i> |                                           |
| <b><i>EEZs of Pacific SIDS</i></b> |                                         |           |          |                                  |           |          |                                           |
| Cook Is                            | 85.9                                    | 10.0      | 4.1      | +9                               | +10       | +4       | +8.9                                      |
| FSM                                | 80.8                                    | 16.4      | 2.8      | -3                               | -2        | +2       | -2.7                                      |
| Kiribati - Gilbert Is              | 78.3                                    | 17.7      | 4.1      | +10                              | -5        | -1       | +6.9                                      |
| Kiribati - Phoenix Is              | 84.5                                    | 11.7      | 3.9      | +8                               | 0         | +1       | +6.8                                      |
| Kiribati - Line Is                 | 77.7                                    | 13.7      | 8.5      | +6                               | +12       | +6       | +6.8                                      |
| Marshall Is                        | 81.0                                    | 14.7      | 4.3      | +3                               | -2        | -1       | +2.1                                      |
| Nauru                              | 77.8                                    | 18.0      | 4.2      | +9                               | -7        | -2       | +5.7                                      |
| Palau                              | 64.0                                    | 35.5      | 1.2      | +2                               | +5        | +5       | +3.1                                      |
| PNG                                | 69.0                                    | 28.2      | 2.8      | -19                              | -8        | -4       | -15.5                                     |
| Solomon Is                         | 72.4                                    | 25.0      | 2.6      | -10                              | -5        | -7       | -8.7                                      |
| Tokelau                            | 89.0                                    | 7.8       | 3.2      | +6                               | +5        | -1       | +5.7                                      |
| Tuvalu                             | 87.4                                    | 9.5       | 3.1      | +4                               | 0         | -2       | +3.4                                      |
| <b><i>High-seas areas</i></b>      |                                         |           |          |                                  |           |          |                                           |
| I1                                 | 68.7                                    | 27.5      | 3.8      | -17                              | 0         | 0        | -11.7                                     |
| I2                                 | 80.7                                    | 15.8      | 3.5      | -11                              | -7        | -5       | -10.2                                     |
| I3                                 | 95.6                                    | 3.0       | 1.5      | +31                              | +6        | +3       | +29.8                                     |
| I4                                 | 77.0                                    | 14.9      | 8.1      | +7                               | +4        | 0        | +6.0                                      |
| I5                                 | 73.2                                    | 15.2      | 11.7     | +13                              | +16       | +7       | +12.8                                     |
| I6                                 | 95.4                                    | 3.1       | 1.5      | +10                              | +9        | -1       | +9.8                                      |
| I7                                 | 76.6                                    | 16.2      | 7.2      | 0                                | +8        | 0        | +1.3                                      |
| I8                                 | 68.2                                    | 22.7      | 9.1      | +28                              | +5        | 0        | +20.2                                     |
| I9                                 | 72.3                                    | 18.7      | 9.0      | +8                               | +14       | +6       | +8.9                                      |
| H4                                 | 88.2                                    | 9.3       | 2.5      | +13                              | +1        | 0        | +11.6                                     |
| H5                                 | 84.2                                    | 11.9      | 3.9      | +4                               | +4        | +3       | +4.0                                      |
| EPO-N                              | 8.4                                     | 91.6      | 0.0      | +12                              | +17       | +10      | +16.6                                     |
| EPO-C                              | 55.6                                    | 32.3      | 12.1     | +17                              | +22       | +14      | +18.3                                     |
| EPO-S                              | 61.7                                    | 16.4      | 21.9     | +14                              | +18       | +10      | +13.8                                     |

\* Rounded to one decimal place; \*\*Calculated as  $((a \times d) + (b \times e) + (c \times f))/100$

**Supplementary Table 18b.** Projected *maximum* (i.e., maximum negative, minimum positive) percentage changes in purse-seine catch in the exclusive economic zones (EEZs) of 10 Pacific Small Island Developing States (Pacific SIDS), and high-seas areas (Supplementary Figure 1), based on SEAPODYM simulations for the IPCC RCP4.5 emissions scenario by 2050. Projections for the percentage changes in purse-seine catch are based on average percentage changes in combined biomass of skipjack, yellowfin and bigeye tuna, weighted by their average relative abundance in purse-seine catches for the 10-year period (2009–2018) (Supplementary Tables 3 and 4). FSM = Federated States of Micronesia; PNG = Papua New Guinea.

| Area                        | Relative abundance of tuna species (%)* |           |          | Projected changes in biomass (%) |           |          | Change in purse-seine catch by 2050 (%)** |
|-----------------------------|-----------------------------------------|-----------|----------|----------------------------------|-----------|----------|-------------------------------------------|
|                             | Skipjack                                | Yellowfin | Bigeye   | Skipjack                         | Yellowfin | Bigeye   |                                           |
|                             | <i>a</i>                                | <i>B</i>  | <i>c</i> | <i>d</i>                         | <i>e</i>  | <i>F</i> |                                           |
| <b>EEZs of Pacific SIDS</b> |                                         |           |          |                                  |           |          |                                           |
| Cook Is                     | 85.9                                    | 10.0      | 4.1      | -9                               | +3        | 1        | -7.4                                      |
| FSM                         | 80.8                                    | 16.4      | 2.8      | -11                              | -6        | -3       | -10.0                                     |
| Kiribati - Gilbert Is       | 78.3                                    | 17.7      | 4.1      | -1                               | -8        | -5       | -2.4                                      |
| Kiribati - Phoenix Is       | 84.5                                    | 11.7      | 3.9      | +2                               | -2        | -3       | 1.3                                       |
| Kiribati - Line Is          | 77.7                                    | 13.7      | 8.5      | -6                               | +7        | 3        | -3.4                                      |
| Marshall Is                 | 81.0                                    | 14.7      | 4.3      | -6                               | -7        | -6       | -6.1                                      |
| Nauru                       | 77.8                                    | 18.0      | 4.2      | -3                               | -10       | -6       | -4.4                                      |
| Palau                       | 64.0                                    | 35.5      | 1.2      | -9                               | +3        | 1        | -4.7                                      |
| PNG                         | 69.0                                    | 28.2      | 2.8      | -29                              | -10       | -8       | -23.1                                     |
| Solomon Is                  | 72.4                                    | 25.0      | 2.6      | -25                              | -8        | -10      | -20.4                                     |
| Tokelau                     | 89.0                                    | 7.8       | 3.2      | -11                              | 0         | -3       | -9.9                                      |
| Tuvalu                      | 87.4                                    | 9.5       | 3.1      | -5                               | -4        | -5       | -4.9                                      |
| <b>High-seas areas</b>      |                                         |           |          |                                  |           |          |                                           |
| I1                          | 68.7                                    | 27.5      | 3.8      | -28                              | -2        | -5       | -20.0                                     |
| I2                          | 80.7                                    | 15.8      | 3.5      | -22                              | -10       | -9       | -19.6                                     |
| I3                          | 95.6                                    | 3.0       | 1.5      | +19                              | +4        | -1       | +18.3                                     |
| I4                          | 77.0                                    | 14.9      | 8.1      | 0                                | -1        | -5       | -0.6                                      |
| I5                          | 73.2                                    | 15.2      | 11.7     | -2                               | +11       | +1       | +0.3                                      |
| I6                          | 95.4                                    | 3.1       | 1.5      | -3                               | +4        | -6       | -2.8                                      |
| I7                          | 76.6                                    | 16.2      | 7.2      | -9                               | +3        | -6       | -6.8                                      |
| I8                          | 68.2                                    | 22.7      | 9.1      | +2                               | +1        | -4       | +1.2                                      |
| I9                          | 72.3                                    | 18.7      | 9.0      | -7                               | +4        | +2       | -4.1                                      |
| H4                          | 88.2                                    | 9.3       | 2.5      | +4                               | -2        | -4       | +3.2                                      |
| H5                          | 84.2                                    | 11.9      | 3.9      | -1                               | +2        | 0        | -0.6                                      |
| EPO-N                       | 8.4                                     | 91.6      | 0.0      | +7                               | +10       | +5       | +9.7                                      |
| EPO-C                       | 55.6                                    | 32.3      | 12.1     | +3                               | +14       | +7       | +7.0                                      |
| EPO-S                       | 61.7                                    | 16.4      | 21.9     | +4                               | +5        | +5       | +4.4                                      |

\* Rounded to one decimal place; \*\*Calculated as  $((a \times d) + (b \times e) + (c \times f))/100$

**Supplementary Table 18c.** Projected *minimum* (i.e., minimum negative, maximum positive) percentage changes in purse-seine catch in the exclusive economic zones (EEZs) of 10 Pacific Small Island Developing States (Pacific SIDS), and high-seas areas (Supplementary Figure 1), based on SEAPODYM simulations for the IPCC RCP4.5 emissions scenario by 2050. Projections for the percentage changes in purse-seine catch are based on average percentage changes in combined biomass of skipjack, yellowfin and bigeye tuna, weighted by their average relative abundance in purse-seine catches for the 10-year period (2009–2018) (Supplementary Tables 3 and 4). FSM = Federated States of Micronesia; PNG = Papua New Guinea.

| Area                               | Relative abundance of tuna species (%)* |           |          | Projected changes in biomass (%) |           |          | Change in purse-seine catch by 2050 (%)** |
|------------------------------------|-----------------------------------------|-----------|----------|----------------------------------|-----------|----------|-------------------------------------------|
|                                    | Skipjack                                | Yellowfin | Bigeye   | Skipjack                         | Yellowfin | Bigeye   |                                           |
|                                    | <i>a</i>                                | <i>B</i>  | <i>c</i> | <i>D</i>                         | <i>e</i>  | <i>F</i> |                                           |
| <b><i>EEZs of Pacific SIDS</i></b> |                                         |           |          |                                  |           |          |                                           |
| Cook Is                            | 85.9                                    | 10.0      | 4.1      | +27                              | +19       | +9       | +25.5                                     |
| FSM                                | 80.8                                    | 16.4      | 2.8      | +5                               | +2        | +5       | +4.5                                      |
| Kiribati - Gilbert Is              | 78.3                                    | 17.7      | 4.1      | +21                              | -3        | +2       | +16.0                                     |
| Kiribati - Phoenix Is              | 84.5                                    | 11.7      | 3.9      | +14                              | +3        | +4       | +12.3                                     |
| Kiribati - Line Is                 | 77.7                                    | 13.7      | 8.5      | +11                              | +16       | +10      | +11.6                                     |
| Marshall Is                        | 81.0                                    | 14.7      | 4.3      | +14                              | 0         | +2       | +11.4                                     |
| Nauru                              | 77.8                                    | 18.0      | 4.2      | +22                              | -2        | +0       | +16.8                                     |
| Palau                              | 64.0                                    | 35.5      | 1.2      | +20                              | +8        | +9       | +15.7                                     |
| PNG                                | 69.0                                    | 28.2      | 2.8      | +2                               | -2        | -1       | +0.8                                      |
| Solomon Is                         | 72.4                                    | 25.0      | 2.6      | +9                               | -2        | -5       | +5.9                                      |
| Tokelau                            | 89.0                                    | 7.8       | 3.2      | +33                              | +13       | +4       | +30.5                                     |
| Tuvalu                             | 87.4                                    | 9.5       | 3.1      | +22                              | +6        | +2       | +19.9                                     |
| <b><i>High-seas areas</i></b>      |                                         |           |          |                                  |           |          |                                           |
| I1                                 | 68.7                                    | 27.5      | 3.8      | 0                                | +3        | +2       | +0.9                                      |
| I2                                 | 80.7                                    | 15.8      | 3.5      | 0                                | -4        | -2       | -0.7                                      |
| I3                                 | 95.6                                    | 3.0       | 1.5      | +51                              | +10       | +7       | +49.1                                     |
| I4                                 | 77.0                                    | 14.9      | 8.1      | +13                              | +10       | +3       | +11.7                                     |
| I5                                 | 73.2                                    | 15.2      | 11.7     | +25                              | +22       | +10      | +22.8                                     |
| I6                                 | 95.4                                    | 3.1       | 1.5      | +18                              | +14       | +1       | +17.6                                     |
| I7                                 | 76.6                                    | 16.2      | 7.2      | +15                              | +18       | +8       | +15.0                                     |
| I8                                 | 68.2                                    | 22.7      | 9.1      | +56                              | +10       | +3       | +40.7                                     |
| I9                                 | 72.3                                    | 18.7      | 9.0      | +25                              | +22       | +11      | +23.2                                     |
| H4                                 | 88.2                                    | 9.3       | 2.5      | +18                              | +7        | +4       | +16.6                                     |
| H5                                 | 84.2                                    | 11.9      | 3.9      | +8                               | +8        | +7       | +8.0                                      |
| EPO-N                              | 8.4                                     | 91.6      | 0.0      | +16                              | +26       | +16      | +25.2                                     |
| EPO-C                              | 55.6                                    | 32.3      | 12.1     | +35                              | +36       | +22      | +33.8                                     |
| EPO-S                              | 61.7                                    | 16.4      | 21.9     | +27                              | +37       | +19      | +26.9                                     |

\* Rounded to one decimal place; \*\*Calculated as  $((a \times d) + (b \times e) + (c \times f))/100$

**Supplementary Table 19a.** Projected *average* changes in the catches of skipjack, yellowfin and bigeye tuna in tonnes (t) caught by purse-seine fishing in the three exclusive economic zone (EEZ) areas of Kiribati by 2050 under the IPCC RCP8.5 emissions scenario, relative to average catches for the 10-year period 2009–2018, based on the projected changes in biomass of each tuna species in Supplementary Table 17a. Changes in the total combined catch of all three tuna species in each EEZ area, and for the total EEZ of Kiribati, are shown. Values for ‘2050 catch’ and ‘Change (t)’ are rounded to the nearest whole number.

| Species              | Catch                        | EEZ area       |               |               |                |
|----------------------|------------------------------|----------------|---------------|---------------|----------------|
|                      |                              | Gilbert Is     | Phoenix Is    | Line Is       | Total          |
| Skipjack             | 10-year average catch        | 203,548        | 79,976        | 32,089        | <b>315,613</b> |
|                      | 2050 catch                   | 175,051        | 78,376        | 36,581        | <b>290,008</b> |
|                      | Change (t)                   | -28,497        | -1,600        | +4,492        | <b>-25,604</b> |
|                      | Change (%)                   | -14            | -2            | +14           | <b>-8.1</b>    |
| Yellowfin            | 10-year average catch        | 45,981         | 11,051        | 5,667         | <b>62,699</b>  |
|                      | 2050 catch                   | 40,003         | 10,277        | 6,064         | <b>56,345</b>  |
|                      | Change (t)                   | -5,978         | -774          | +397          | <b>-6,354</b>  |
|                      | Change (%)                   | -13            | -7            | +7            | <b>-10.1</b>   |
| Bigeye               | 10-year average catch        | 10,544         | 3,670         | 3,523         | <b>17,737</b>  |
|                      | 2050 catch                   | 10,123         | 3,486         | 3,558         | <b>17,167</b>  |
|                      | Change (t)                   | -422           | -183          | +35           | <b>-570</b>    |
|                      | Change (%)                   | -4             | -5            | +1            | <b>-3.2</b>    |
| All species combined | <b>10-year average catch</b> | <b>260,073</b> | <b>94,697</b> | <b>41,279</b> | <b>396,049</b> |
|                      | <b>2050 catch</b>            | <b>225,177</b> | <b>92,140</b> | <b>46,203</b> | <b>363,520</b> |
|                      | <b>Change (t)</b>            | <b>-34,896</b> | <b>-2,557</b> | <b>+4,924</b> | <b>-32,528</b> |
|                      | <b>Change (%)</b>            | <b>-13.4</b>   | <b>-2.7</b>   | <b>+11.9</b>  | <b>-8.2</b>    |

**Supplementary Table 19b.** Projected *maximum* (i.e., maximum negative, minimum positive) changes in the catches of skipjack, yellowfin and bigeye tuna in tonnes (t) caught by purse-seine fishing in the three exclusive economic zone (EEZ) areas of Kiribati by 2050 under the IPCC RCP8.5 emissions scenario, relative to average catches for the 10-year period 2009–2018, based on the projected changes in biomass of each tuna species in Supplementary Table 17b. Changes in the total combined catch of all three tuna species in each EEZ area, and for the total EEZ of Kiribati, are shown. Values for ‘2050 catch’ and ‘Change (t)’ are rounded to the nearest whole number.

| Species              | Catch                        | EEZ area       |                |               |                |
|----------------------|------------------------------|----------------|----------------|---------------|----------------|
|                      |                              | Gilbert Is     | Phoenix Is     | Line Is       | Total          |
| Skipjack             | 10-year average catch        | 203,548        | 79,976         | 32,089        | <b>315,613</b> |
|                      | 2050 catch                   | 144,519        | 69,579         | 34,977        | <b>249,074</b> |
|                      | Change (t)                   | -59,029        | -10,397        | +2,888        | <b>-66,538</b> |
|                      | Change (%)                   | -29            | -13            | +9            | <b>-21.1</b>   |
| Yellowfin            | 10-year average catch        | 45,981         | 11,051         | 5,667         | <b>62,699</b>  |
|                      | 2050 catch                   | 39,084         | 10,056         | 5,781         | <b>54,921</b>  |
|                      | Change (t)                   | -6,897         | -995           | +113          | <b>-7,778</b>  |
|                      | Change (%)                   | -15            | -9             | +2            | <b>-12.4</b>   |
| Bigeye               | 10-year average catch        | 10,544         | 3,670          | 3,523         | <b>17,737</b>  |
|                      | 2050 catch                   | 10,017         | 3,450          | 3,488         | <b>16,954</b>  |
|                      | Change (t)                   | -527           | -220           | -35           | <b>-783</b>    |
|                      | Change (%)                   | -5.0           | -6.0           | -1.0          | <b>-4.4</b>    |
| All species combined | <b>10-year average catch</b> | <b>260,073</b> | <b>94,697</b>  | <b>41,279</b> | <b>396,049</b> |
|                      | <b>2050 catch</b>            | <b>193,620</b> | <b>83,085</b>  | <b>44,245</b> | <b>320,950</b> |
|                      | <b>Change (t)</b>            | <b>-66,453</b> | <b>-11,612</b> | <b>+2,966</b> | <b>-75,099</b> |
|                      | <b>Change (%)</b>            | <b>-25.6</b>   | <b>-12.3</b>   | <b>+7.2</b>   | <b>-19.0</b>   |

**Supplementary Table 19c.** Projected *minimum* (i.e., minimum negative, maximum positive) changes in the catches of skipjack, yellowfin and bigeye tuna in tonnes (t) caught by purse-seine fishing in the three exclusive economic zone (EEZ) areas of Kiribati by 2050 under the IPCC RCP8.5 emissions scenario, relative to average catches for the 10-year period 2009–2018, based on the projected changes in biomass of each tuna species in Supplementary Table 17c. Changes in the total combined catch of all three tuna species in each EEZ area, and for the total EEZ of Kiribati, are shown. Values for ‘2050 catch’ and ‘Change (t)’ are rounded to the nearest whole number.

| Species              | Catch                        | EEZ area       |               |               |                |
|----------------------|------------------------------|----------------|---------------|---------------|----------------|
|                      |                              | Gilbert Is     | Phoenix Is    | Line Is       | Total          |
| Skipjack             | 10-year average catch        | 203,548        | 79,976        | 32,089        | <b>315,613</b> |
|                      | 2050 catch                   | 201,513        | 83,974        | 38,506        | <b>323,993</b> |
|                      | Change (t)                   | -2,035         | +3,999        | +6,418        | <b>+8,381</b>  |
|                      | Change (%)                   | -1             | +5            | +20           | <b>+2.7</b>    |
| Yellowfin            | 10-year average catch        | 45,981         | 11,051        | 5,667         | <b>62,699</b>  |
|                      | 2050 catch                   | 41,383         | 10,498        | 6,404         | <b>58,285</b>  |
|                      | Change (t)                   | -4,598         | -553          | +737          | <b>-4,414</b>  |
|                      | Change (%)                   | -10            | -5            | +13           | <b>-7.0</b>    |
| Bigeye               | 10-year average catch        | 10,544         | 3,670         | 3,523         | <b>17,737</b>  |
|                      | 2050 catch                   | 10,228         | 3,523         | 3,629         | <b>17,380</b>  |
|                      | Change (t)                   | -316           | -147          | +106          | <b>-357</b>    |
|                      | Change (%)                   | -3             | -4            | +3            | <b>-2.0</b>    |
| All species combined | <b>10-year average catch</b> | <b>260,073</b> | <b>94,697</b> | <b>41,279</b> | <b>396,049</b> |
|                      | <b>2050 catch</b>            | <b>253,123</b> | <b>97,996</b> | <b>48,539</b> | <b>399,658</b> |
|                      | <b>Change (t)</b>            | <b>-6,950</b>  | <b>+3,299</b> | <b>+7,260</b> | <b>+3,610</b>  |
|                      | <b>Change (%)</b>            | <b>-2.7</b>    | <b>+3.5</b>   | <b>+17.6</b>  | <b>+0.9</b>    |

**Supplementary Table 20a.** Projected *average* changes in the catches of skipjack, yellowfin and bigeye tuna in tonnes (t) caught by purse-seine fishing in the three exclusive economic zone (EEZ) areas of Kiribati by 2050 under the IPCC RCP4.5 emissions scenario, relative to average catches for the 10-year period 2009–2018, based on the projected changes in biomass of each tuna species in Supplementary Table 18a. Changes in the total combined catch of all three tuna species in each EEZ area, and for the total EEZ of Kiribati, are shown. Values for ‘2050 catch’ and ‘Change (t)’ are rounded to the nearest whole number.

| Species                     | Catch                        | EEZ area       |                |               |                |
|-----------------------------|------------------------------|----------------|----------------|---------------|----------------|
|                             |                              | Gilbert Is     | Phoenix Is     | Line Is       | Total          |
| Skipjack                    | 10-year average catch        | 203,548        | 79,976         | 32,089        | <b>315,613</b> |
|                             | 2050 catch                   | 223,903        | 86,374         | 34,014        | <b>344,291</b> |
|                             | Change (t)                   | +20,355        | +6,398         | +1,925        | <b>+28,678</b> |
|                             | Change (%)                   | +10            | +8             | +6            | <b>+9.1</b>    |
| Yellowfin                   | 10-year average catch        | 45,981         | 11,051         | 5,667         | <b>62,699</b>  |
|                             | 2050 catch                   | 43,682         | 11,051         | 6,347         | <b>61,080</b>  |
|                             | Change (t)                   | -2,299         | 0              | +680          | <b>-1,619</b>  |
|                             | Change (%)                   | -5             | 0              | +12           | <b>-2.6</b>    |
| Bigeye                      | 10-year average catch        | 10,544         | 3,670          | 3,523         | <b>17,737</b>  |
|                             | 2050 catch                   | 10,439         | 3,707          | 3,734         | <b>17,880</b>  |
|                             | Change (t)                   | -105           | +37            | +211          | <b>+143</b>    |
|                             | Change (%)                   | -1             | +1             | +6            | <b>+0.8</b>    |
| <b>All species combined</b> | <b>10-year average catch</b> | <b>260,073</b> | <b>94,697</b>  | <b>41,279</b> | <b>396,049</b> |
|                             | <b>2050 catch</b>            | <b>278,023</b> | <b>101,132</b> | <b>44,096</b> | <b>423,251</b> |
|                             | <b>Change (t)</b>            | <b>+17,950</b> | <b>+6,435</b>  | <b>+2,817</b> | <b>+27,202</b> |
|                             | <b>Change (%)</b>            | <b>+6.9</b>    | <b>+6.8</b>    | <b>+6.8</b>   | <b>+6.9</b>    |



**Supplementary Table 20b.** Projected *maximum* (i.e., maximum negative, minimum positive) changes in the catches of skipjack, yellowfin and bigeye tuna in tonnes (t) caught by purse-seine fishing in the three exclusive economic zone (EEZ) areas of Kiribati by 2050 under the IPCC RCP4.5 emissions scenario, relative to average catches for the 10-year period 2009–2018, based on the projected changes in biomass of each tuna species in Supplementary Table 18b. Changes in the total combined catch of all three tuna species in each EEZ area, and for the total EEZ of Kiribati, are shown. Values for ‘2050 catch’ and ‘Change (t)’ are rounded to the nearest whole number.

| Species              | Catch                        | EEZ area       |               |               |                |
|----------------------|------------------------------|----------------|---------------|---------------|----------------|
|                      |                              | Gilbert Is     | Phoenix Is    | Line Is       | Total          |
| Skipjack             | 10-year average catch        | 203,548        | 79,976        | 32,089        | <b>315,613</b> |
|                      | 2050 catch                   | 201,513        | 81,576        | 30,164        | <b>313,252</b> |
|                      | Change (t)                   | -2,035         | 1,600         | -1,925        | <b>-2,361</b>  |
|                      | Change (%)                   | -1             | +2            | -6            | <b>-0.7</b>    |
| Yellowfin            | 10-year average catch        | 45,981         | 11,051        | 5,667         | <b>62,699</b>  |
|                      | 2050 catch                   | 42,303         | 10,830        | 6,064         | <b>59,196</b>  |
|                      | Change (t)                   | -3,678         | -221          | +397          | <b>-3,503</b>  |
|                      | Change (%)                   | -8             | -2            | +7            | <b>-5.6</b>    |
| Bigeye               | 10-year average catch        | 10,544         | 3,670         | 3,523         | <b>17,737</b>  |
|                      | 2050 catch                   | 10,017         | 3,560         | 3,629         | <b>17,205</b>  |
|                      | Change (t)                   | -527           | -110          | +106          | <b>-532</b>    |
|                      | Change (%)                   | -5             | -3            | +3            | <b>-3.0</b>    |
| All species combined | <b>10-year average catch</b> | <b>260,073</b> | <b>94,697</b> | <b>41,279</b> | <b>396,049</b> |
|                      | <b>2050 catch</b>            | <b>253,832</b> | <b>95,965</b> | <b>39,856</b> | <b>389,653</b> |
|                      | <b>Change (t)</b>            | <b>-6,241</b>  | <b>+1,268</b> | <b>-1,423</b> | <b>-6,396</b>  |
|                      | <b>Change (%)</b>            | <b>-2.4</b>    | <b>+1.3</b>   | <b>-3.4</b>   | <b>-1.6</b>    |

**Supplementary Table 20c.** Projected *minimum* (i.e., minimum negative, maximum positive) changes in the catches of skipjack, yellowfin and bigeye tuna in tonnes (t) caught by purse-seine fishing in the three exclusive economic zone (EEZ) areas of Kiribati by 2050 under the IPCC RCP4.5 emissions scenario, relative to average catches for the 10-year period 2009–2018, based on the projected changes in biomass of each tuna species in Supplementary Table 18c. Changes in the total combined catch of all three tuna species in each EEZ area, and for the total EEZ of Kiribati, are shown. Values for ‘2050 catch’ and ‘Change (t)’ are rounded to the nearest whole number.

| Species              | Catch                        | EEZ area       |                |               |                |
|----------------------|------------------------------|----------------|----------------|---------------|----------------|
|                      |                              | Gilbert Is     | Phoenix Is     | Line Is       | Total          |
| Skipjack             | 10-year average catch        | 203,548        | 79,976         | 32,089        | <b>315,613</b> |
|                      | 2050 catch                   | 246,293        | 91,173         | 35,619        | <b>373,085</b> |
|                      | Change (t)                   | +42,745        | +11,197        | +3,530        | <b>+57,472</b> |
|                      | Change (%)                   | +21            | +14            | +11           | <b>+18.2</b>   |
| Yellowfin            | 10-year average catch        | 45,981         | 11,051         | 5,667         | <b>62,699</b>  |
|                      | 2050 catch                   | 44,602         | 11,383         | 6,574         | <b>62,558</b>  |
|                      | Change (t)                   | -1,379         | +332           | +907          | <b>-141</b>    |
|                      | Change (%)                   | -3             | +3             | +16           | <b>-0.2</b>    |
| Bigeye               | 10-year average catch        | 10,544         | 3,670          | 3,523         | <b>17,737</b>  |
|                      | 2050 catch                   | 10,755         | 3,817          | 3,875         | <b>18,447</b>  |
|                      | Change (t)                   | +211           | +147           | +352          | <b>+710</b>    |
|                      | Change (%)                   | +2             | +4             | +10           | <b>+4</b>      |
| All species combined | <b>10-year average catch</b> | <b>260,073</b> | <b>94,697</b>  | <b>41,279</b> | <b>396,049</b> |
|                      | <b>2050 catch</b>            | <b>301,650</b> | <b>106,372</b> | <b>46,068</b> | <b>454,089</b> |
|                      | <b>Change (t)</b>            | <b>+41,577</b> | <b>+11,675</b> | <b>+4,789</b> | <b>+58,040</b> |
|                      | <b>Change (%)</b>            | <b>+16.0</b>   | <b>+12.3</b>   | <b>+11.6</b>  | <b>+14.7</b>   |

**Supplementary Table 21.** Uncertainties explored in the simulation ensembles for the three tropical tuna species.

| Name | Model                                                                                                                                                                      |                                    |                              |                                  | Uncertainty                                    |
|------|----------------------------------------------------------------------------------------------------------------------------------------------------------------------------|------------------------------------|------------------------------|----------------------------------|------------------------------------------------|
|      | GFDL                                                                                                                                                                       | IPSL                               | MIROC-                       | MPI                              |                                                |
| REF  | DSF5+GFDL-<br>ESM2G<br>anomalies                                                                                                                                           | DSF5+IPSL-<br>CM5A-MR<br>anomalies | DSF5+MIROC-<br>ESM anomalies | DSF5+MPI-<br>ESM-MR<br>anomalies | Atmospheric forcing                            |
| SP   | <i>Primary production:</i> Increase of PP by 10% in tropical waters (defined by SST >27°C)                                                                                 |                                    |                              |                                  | Structural uncertainty in biogeochemical model |
| SO   | <i>Dissolved Oxygen:</i> No change = Use of climatological fields                                                                                                          |                                    |                              |                                  |                                                |
| ST   | <i>Genetic adaptation:</i> Gradual increase in optimal spawning temperature to reach + 1°C by mid-century                                                                  |                                    |                              |                                  | Structural uncertainty in SEAPODYM             |
| PH   | <i>Ocean acidification:</i> Additional mortality of larvae based on laboratory experiments with low medium and high sensitivity to pH (available only for yellowfin tuna). |                                    |                              |                                  |                                                |
